# Supplementary material for: microRNA-mRNA Profile of Skeletal Muscle Differentiation and Relevance to Congenital Myotonic Dystrophy
Source: Int J Mol Sci. 2021 Mar 7;22(5):2692. doi: 10.3390/ijms22052692 (PMC7962092; doi:10.3390/ijms22052692)
Supplement: Supplementary file 1 [file ijms-22-02692-s001.xlsx]

## Sheet: Supplemental Table 1
Gene	LFC D0 to D2	FDR D0 to D2	LFC D2 to D5	FDR D2 to D5	LFC D0 to D5	FDR D0 to D5
mmu-let-7a-1-3p	0.930352	3.43847e-08	-1.10938	7.71193e-10	-0.179158	0.345731		*miRNA represented in both mouse and human miRNA data
mmu-let-7a-5p*	-0.62985	1.92297e-05	0.397367	0.00967775	-0.232482	0.126904
mmu-let-7b-3p*	-0.102911	0.852557	-2.32929	1.51258e-06	-2.43511	5.66875e-08
mmu-let-7b-5p*	0.684763	2.88314e-06	-1.19539	2.41181e-16	-0.510625	0.000444798
mmu-let-7c-2-3p	0.930352	3.43847e-08	-1.10938	7.71193e-10	-0.179158	0.345731
mmu-let-7c-5p*	0.451965	0.00256284	0.705612	2.01926e-06	1.15758	7.65399e-16
mmu-let-7d-3p*	-0.248173	0.124168	-3.32982	1.63027e-89	-3.57816	6.83636e-105
mmu-let-7d-5p*	-0.347938	0.0261571	0.837905	2.58506e-08	0.489976	0.00087805
mmu-let-7e-3p*	-0.127352	0.947957	-1.44701	0.372474	-1.57658	0.253708
mmu-let-7e-5p*	-0.11134	0.519878	-0.363909	0.0204089	-0.475252	0.00120304
mmu-let-7f-1-3p*	0.383197	0.38147	-2.01883	8.9335e-05	-1.64128	0.000428942
mmu-let-7f-5p*	0.103062	0.548284	0.887948	1.61786e-09	0.99101	5.62719e-12
mmu-let-7g-5p*	-0.435229	0.00413031	0.843432	1.48371e-08	0.408207	0.00569198
mmu-let-7i-5p*	-0.201484	0.208856	-0.0843344	0.671572	-0.285818	0.0573119
mmu-miR-100-5p*	-0.481675	0.00132612	0.110413	0.554484	-0.371262	0.0122294
mmu-miR-101a-3p	-0.924427	1.25547e-09	0.33262	0.0496186	-0.591797	8.10925e-05
mmu-miR-101b-3p	-0.0670135	0.737574	0.595627	0.000208253	0.528633	0.00046874
mmu-miR-103-3p	-0.659859	2.04387e-05	0.229642	0.206309	-0.43021	0.00491438
mmu-miR-106b-3p*	-1.28561	8.01181e-14	0.473398	0.0166593	-0.812156	6.89113e-07
mmu-miR-106b-5p*	-1.4011	0.000363085	-1.38396	0.00415539	-2.78667	2.16601e-11
mmu-miR-107-3p	-1.01844	0.0175503	0.511389	0.346416	-0.506689	0.224995
mmu-miR-10a-5p*	-1.90019	7.57871e-35	-1.70326	3.83873e-21	-3.60369	3.15142e-98
mmu-miR-10b-5p*	-2.38893	1.14579e-43	-1.71325	5.01791e-13	-4.10291	2.66094e-96
mmu-miR-1191a	0.628772	0.685626	-0.686421	0.707274	-0.0583829	0.99165
mmu-miR-1198-5p	0.249574	0.158131	-0.540803	0.00246346	-0.291275	0.0897289
mmu-miR-125a-3p*	-0.411915	0.0697939	0.284524	0.28749	-0.12731	0.564523
mmu-miR-125a-5p*	-0.289705	0.0730329	-0.064304	0.760601	-0.354011	0.0197338
mmu-miR-125b-1-3p*	-1.34525	0.119749	-0.908592	0.340881	-2.25387	0.00611574
mmu-miR-125b-2-3p*	-0.279369	0.397918	-0.0956952	0.878477	-0.375163	0.187557
mmu-miR-125b-5p*	-0.23947	0.134336	-0.433202	0.0054817	-0.672676	4.50031e-06
mmu-miR-128-2-5p*	2.34356	0.0955106	-1.86264	0.218505	0.479212	0.776738
mmu-miR-128-3p*	1.93696	6.94896e-40	-0.145545	0.415079	1.79141	8.31572e-35
mmu-miR-129-5p*	-1.15207	1.77412e-10	-0.485323	0.0341689	-1.63754	9.26602e-20
mmu-miR-130a-3p*	0.773311	0.604613	0.539177	0.760418	1.31286	0.32102
mmu-miR-130b-5p*	-0.723366	2.04387e-05	-1.53784	1.16612e-14	-2.26155	6.51801e-36
mmu-miR-132-3p*	0.00240582	1	0.376817	0.756074	0.379452	0.684196
mmu-miR-133a-3p*	3.45669	8.65136e-51	3.68181	4.81838e-102	7.13891	3.17295e-250
mmu-miR-133a-5p*	11.0885	2.24395e-46	0.764559	0.000456701	11.9367	8.76133e-78
mmu-miR-133b-3p	3.22211	4.17288e-10	4.68241	3.486e-68	8.24937	8.41526e-74
mmu-miR-133b-5p	9.8829	5.63934e-12	-0.843247	0.252267	9.12222	2.54048e-09
mmu-miR-135a-5p	-0.972797	0.0305315	0.901132	0.0654382	-0.070046	0.959745
mmu-miR-139-3p	5.53402	1.45219e-70	-1.88877	3.08828e-16	3.64551	2.13912e-21
mmu-miR-139-5p*	4.80821	7.09866e-97	0.305465	0.111664	5.114	2.04778e-114
mmu-miR-140-3p*	-0.445862	0.00326321	-0.165425	0.354951	-0.611288	2.87925e-05
mmu-miR-140-5p*	-0.0567295	0.827707	0.74863	2.98646e-05	0.691976	2.0507e-05
mmu-miR-143-3p*	0.420667	0.00514842	0.43459	0.00448465	0.855258	2.79838e-09
mmu-miR-143-5p*	0.33177	0.54496	1.70738	6.44418e-05	2.04022	1.77849e-07
mmu-miR-145a-3p	0.436485	0.0123853	0.873505	1.95115e-07	1.31005	7.05073e-17
mmu-miR-146a-5p*	-2.2088	1.179e-33	-1.39919	8.07092e-08	-3.60876	3.48836e-70
mmu-miR-146b-5p*	-1.5992	5.65967e-27	1.53589	1.75191e-24	-0.0632848	0.707018
mmu-miR-148a-3p*	0.673966	6.24409e-06	1.0229	5.05848e-12	1.69687	2.70725e-31
mmu-miR-148a-5p*	0.522294	0.285126	-0.23241	0.750288	0.289553	0.591313
mmu-miR-148b-3p*	-0.334026	0.0427535	0.42652	0.0100208	0.0925099	0.587866
mmu-miR-148b-5p*	0.0497082	0.987996	-0.588845	0.757827	-0.5398	0.711768
mmu-miR-149-5p*	1.24051	7.54892e-16	-0.329032	0.0540122	0.911467	3.08649e-09
mmu-miR-151-3p	-0.655774	9.12611e-06	-0.0764416	0.707274	-0.732216	4.52945e-07
mmu-miR-151-5p	3.9396	1.92212e-115	0.167305	0.360837	4.10695	7.82944e-126
mmu-miR-152-3p*	0.00401124	0.989969	1.66426	8.25249e-28	1.66832	1.55135e-29
mmu-miR-152-5p*	0.982807	1.26968e-05	0.308769	0.227476	1.2917	3.18224e-10
mmu-miR-155-5p*	-2.1839	2.23847e-34	-0.375683	0.139456	-2.55973	3.34258e-46
mmu-miR-15b-3p*	-0.386358	0.827707	-0.107947	0.968393	-0.494476	0.736415
mmu-miR-16-1-3p*	-0.0124245	0.969008	-0.699668	0.00450303	-0.712357	0.000727478
mmu-miR-16-2-3p*	-2.01982	1.66108e-27	-2.37263	1.56362e-15	-4.39452	8.1542e-79
mmu-miR-16-5p*	-1.08318	8.2415e-09	0.324171	0.177051	-0.758946	1.92233e-05
mmu-miR-17-5p*	-0.537931	0.00574443	0.586696	0.00452291	0.0488697	0.818811
mmu-miR-181a-1-3p	0.438027	0.0744112	-0.559083	0.0395094	-0.121288	0.647204
mmu-miR-181a-2-3p*	-0.115132	0.538053	-1.60654	3.83873e-21	-1.72182	4.19601e-26
mmu-miR-181a-5p*	-0.577344	0.000202399	0.259956	0.139456	-0.31738	0.0407608
mmu-miR-181b-5p*	-0.261844	0.117182	-0.235211	0.193372	-0.497065	0.00113699
mmu-miR-181d-5p*	0.342815	0.0932566	-0.265936	0.263015	0.0768325	0.729431
mmu-miR-182-5p*	0.242546	0.139408	0.25614	0.136826	0.498692	0.000870786
mmu-miR-183-5p*	0.799093	5.65215e-08	-0.543972	0.00038515	0.255117	0.0965491
mmu-miR-1839-5p	-0.741416	1.58184e-05	0.913206	2.26515e-07	0.171876	0.311645
mmu-miR-1843a-3p	-0.326743	0.851151	0.501086	0.790288	0.174696	0.915299
mmu-miR-1843a-5p	0.177221	0.616236	1.63424	1.67245e-11	1.81216	2.2693e-18
mmu-miR-1843b-3p	0.045774	0.944904	-1.38544	0.00210991	-1.34079	0.0011652
mmu-miR-1843b-5p	0.77944	0.000268963	0.931671	3.12866e-06	1.71131	1.09671e-20
mmu-miR-185-5p*	-0.752808	0.000296881	0.28425	0.296892	-0.468482	0.0159996
mmu-miR-186-5p*	-0.849692	1.51208e-07	-0.177861	0.401684	-1.02757	9.51457e-11
mmu-miR-188-5p*	4.25993	0.00567399	0.732202	0.673791	4.995	0.00125602
mmu-miR-191-5p*	-0.0582553	0.848697	-0.140895	0.638772	-0.199152	0.398071
mmu-miR-192-5p*	0.0109088	0.963107	-0.202819	0.277161	-0.191918	0.239561
mmu-miR-193a-5p*	-0.778777	0.000380727	-0.322565	0.300528	-1.10152	1.77849e-07
mmu-miR-1946a	-1.40497	0.337703	-1.52615	0.372474	-2.93541	0.037527
mmu-miR-195a-3p	-1.41302	1.14465e-11	-0.803789	0.0061592	-2.21734	6.81353e-25
mmu-miR-1964-3p	-0.414725	0.0225734	-0.456158	0.0235131	-0.87096	3.96602e-07
mmu-miR-196a-2-3p	-0.334674	0.240083	-1.76216	2.71443e-06	-2.0992	9.13849e-12
mmu-miR-196a-5p*	-0.230696	0.150161	0.442501	0.00447202	0.211809	0.170866
mmu-miR-196b-5p*	-1.017	4.65202e-08	0.369237	0.106754	-0.647699	0.000218953
mmu-miR-1981-3p	0.829945	0.579947	-0.349785	0.855436	0.479936	0.736415
mmu-miR-1981-5p	0.555486	0.00212115	0.225555	0.28749	0.781074	3.55086e-06
mmu-miR-1983	-0.618743	0.401633	0.225806	0.847365	-0.392629	0.568944
mmu-miR-199a-3p*	0.588562	0.000169087	1.91846	5.72641e-37	2.50706	2.15829e-62
mmu-miR-199a-5p*	1.05153	7.09204e-13	-0.121813	0.509857	0.929716	1.52045e-10
mmu-miR-199b-3p*	0.588562	0.000169087	1.91846	5.72641e-37	2.50706	2.15829e-62
mmu-miR-199b-5p*	1.70007	3.5199e-05	0.0382321	0.95985	1.73844	1.36051e-05
mmu-miR-19a-3p*	-1.16107	0.429356	-0.101334	0.970336	-1.26268	0.344652
mmu-miR-19b-3p*	-1.10703	0.448274	-0.776148	0.647286	-1.88413	0.163222
mmu-miR-1a-3p	3.54034	3.2446e-114	2.49309	2.27199e-62	6.03344	1.60756e-264
mmu-miR-200a-3p	-2.50406	1.60808e-39	-1.76683	5.36728e-09	-4.27238	2.55323e-81
mmu-miR-200b-3p*	-2.30147	2.47856e-46	-1.77828	3.52714e-19	-4.08016	2.80856e-112
mmu-miR-206-3p	3.48457	8.0096e-113	0.120761	0.509857	3.60533	1.95627e-119
mmu-miR-20a-5p*	-1.09829	3.37195e-11	0.368993	0.0550492	-0.729261	5.37576e-06
mmu-miR-210-3p*	0.144323	0.456855	1.16486	2.4783e-12	1.30927	4.52218e-17
mmu-miR-212-5p*	0.393635	0.0392316	-0.938292	3.14796e-06	-0.544842	0.0044045
mmu-miR-214-3p*	0.142771	0.456855	0.510302	0.00331836	0.653109	3.41479e-05
mmu-miR-214-5p*	0.556384	0.00856935	0.907128	5.15291e-06	1.46369	3.2834e-16
mmu-miR-218-5p*	0.200601	0.280788	0.585839	0.000645127	0.78648	5.06402e-07
mmu-miR-21a-3p	-0.645356	0.123922	-1.1933	0.0121264	-1.83977	7.69478e-06
mmu-miR-21a-5p	-0.0709434	0.694932	0.0908081	0.640094	0.0198646	0.915299
mmu-miR-221-3p*	-0.571574	0.000559856	0.830209	7.41073e-07	0.258686	0.11198
mmu-miR-221-5p*	-1.30306	2.20914e-11	-0.0332457	0.9599	-1.33634	9.73234e-13
mmu-miR-222-3p*	-1.03303	2.32689e-12	-0.778225	3.61054e-07	-1.81127	1.20569e-34
mmu-miR-222-5p*	-0.359317	0.8334	-0.983047	0.549994	-1.34334	0.317062
mmu-miR-22-3p*	0.805695	3.70689e-08	0.352535	0.0237415	1.15823	8.97979e-16
mmu-miR-224-5p*	0.0354975	0.853642	-0.266284	0.119373	-0.230792	0.143182
mmu-miR-22-5p*	-0.535437	0.0193988	0.768619	0.00129925	0.233425	0.253708
mmu-miR-23a-3p*	-0.70808	0.000572306	2.64287	1.3193e-44	1.93518	1.05019e-32
mmu-miR-23b-3p*	0.13913	0.564293	2.48427	1.65492e-42	2.62372	1.55418e-55
mmu-miR-23b-5p*	1.54843	0.287863	0.24074	0.90747	1.78962	0.190015
mmu-miR-24-2-5p*	-0.177959	0.35965	0.758074	1.04726e-05	0.580173	0.000251075
mmu-miR-24-3p*	0.334861	0.0305315	1.19086	4.62771e-16	1.52572	5.56252e-26
mmu-miR-25-3p*	-0.894894	2.90083e-09	0.643617	4.07975e-05	-0.251263	0.105867
mmu-miR-25-5p*	-2.13126	0.129153	-0.66651	0.756074	-2.79909	0.0398063
mmu-miR-26a-5p*	-0.541774	0.000269512	0.272258	0.0948046	-0.269515	0.0754394
mmu-miR-26b-5p*	-0.671586	3.57611e-05	0.946016	1.00715e-08	0.274483	0.0887542
mmu-miR-27a-3p*	-0.770327	1.96281e-07	-0.148774	0.415079	-0.919105	3.00667e-10
mmu-miR-27a-5p*	-1.16651	1.01089e-12	0.286626	0.146228	-0.879861	2.43993e-08
mmu-miR-27b-3p*	0.76977	1.41812e-07	0.406448	0.00829708	1.17622	3.13157e-16
mmu-miR-27b-5p*	0.544162	0.0245157	0.516792	0.0279731	1.06113	1.61482e-07
mmu-miR-28a-3p	-0.838412	6.21519e-08	-0.0437229	0.857382	-0.88214	6.5279e-09
mmu-miR-28a-5p	0.111129	0.542584	-0.46111	0.0052369	-0.349999	0.0261065
mmu-miR-296-3p*	1.32057	1.81715e-17	-1.42743	1.26587e-18	-0.106943	0.562498
mmu-miR-298-5p	1.25679	7.30327e-13	0.277973	0.157553	1.53481	8.16995e-20
mmu-miR-29a-3p*	-0.171715	0.313704	-0.0664171	0.75931	-0.238134	0.126904
mmu-miR-29b-3p*	2.36587	1.56807e-24	0.0209515	0.964968	2.38695	7.98358e-27
mmu-miR-3057-5p	-0.229431	0.408243	-0.253131	0.440531	-0.482704	0.0390975
mmu-miR-3066-5p	-0.923505	0.124168	1.59438	0.00631797	0.675184	0.100443
mmu-miR-3068-5p	0.875201	0.0932566	1.51019	0.000150675	2.38773	2.30448e-12
mmu-miR-3081-3p	1.47445	3.5199e-05	-1.05272	0.00876078	0.420523	0.34091
mmu-miR-3095-3p	1.26028	0.388956	-1.21178	0.456967	0.0471836	0.99165
mmu-miR-30a-3p*	-1.22688	6.82819e-16	0.552134	0.000733025	-0.674729	6.71391e-06
mmu-miR-30a-5p*	-1.00783	4.10152e-12	-0.0294787	0.89341	-1.03731	6.13635e-13
mmu-miR-30b-3p*	0.985836	0.519419	0.484272	0.801329	1.47079	0.278594
mmu-miR-30b-5p*	-1.76253	0.000168185	1.77141	0.000808851	0.0129167	1
mmu-miR-30c-2-3p*	-0.989958	2.98847e-09	-0.212024	0.337387	-1.20202	2.13388e-13
mmu-miR-30c-5p*	-1.50489	8.14214e-24	0.641806	4.99226e-05	-0.863071	4.59539e-09
mmu-miR-30d-3p*	-0.0884891	0.900558	0.423435	0.358537	0.335451	0.325283
mmu-miR-30d-5p*	0.426168	0.0047216	0.0394579	0.85558	0.465626	0.0014258
mmu-miR-30e-3p*	0.0340309	0.871505	0.547682	0.00161983	0.581752	0.000237463
mmu-miR-30e-5p*	-0.478417	0.00218936	0.0628505	0.775646	-0.415565	0.00629939
mmu-miR-3102-5p.2-5p	-0.346281	0.129151	-1.22821	4.88235e-06	-1.57519	3.53034e-12
mmu-miR-31-5p*	-1.03217	1.25547e-09	0.604814	0.00121881	-0.427295	0.00911222
mmu-miR-320-3p	-0.707816	2.42816e-06	0.0396255	0.857929	-0.66819	6.2788e-06
mmu-miR-322-3p	2.83749	1.03215e-50	0.570211	0.0011136	3.40781	3.62007e-77
mmu-miR-322-5p	2.46647	7.64816e-09	0.0494955	0.9599	2.5162	1.31951e-09
mmu-miR-32-5p*	-1.26974	2.48029e-05	0.288015	0.621088	-0.981465	0.000266647
mmu-miR-328-3p*	0.758014	2.88314e-06	-1.39805	4.62771e-16	-0.640167	0.000172307
mmu-miR-330-3p*	1.18414	0.408243	-1.47377	0.348597	-0.291254	0.864534
mmu-miR-330-5p*	0.528257	0.191474	-0.611303	0.201782	-0.0839139	0.951971
mmu-miR-335-3p*	2.54447	3.448e-38	-2.08259	3.8478e-23	0.461366	0.063666
mmu-miR-33-5p	-0.924284	0.110295	1.40971	0.00948511	0.48876	0.211676
mmu-miR-339-5p*	-1.17706	6.78725e-05	-0.281378	0.586977	-1.45891	2.81804e-07
mmu-miR-340-5p*	-2.50841	5.71688e-34	-1.86176	2.60553e-07	-4.37255	1.49631e-69
mmu-miR-342-5p*	0.759737	0.0609114	-0.793885	0.0791159	-0.0353139	1
mmu-miR-344-3p	1.09394	0.00872103	0.386344	0.424165	1.48051	0.000115468
mmu-miR-344b-3p	1.1095	0.0147185	-0.387424	0.494435	0.721555	0.116052
mmu-miR-344d-3p	-1.04436	3.4122e-09	-1.26989	7.49147e-09	-2.31464	1.19298e-34
mmu-miR-345-3p	1.81842	0.20419	-0.262496	0.89341	1.55593	0.250591
mmu-miR-34b-3p*	0.882633	0.00583878	-0.0355919	0.960985	0.847092	0.0044045
mmu-miR-34c-5p*	0.495533	0.00118789	-0.0968245	0.630248	0.398708	0.00801143
mmu-miR-350-5p	0.264134	0.413413	-0.423452	0.273043	-0.159667	0.630924
mmu-miR-351-3p	1.46336	0.000258703	-0.0804336	0.95985	1.38307	0.000277414
mmu-miR-351-5p	3.79744	8.98969e-129	-1.54651	6.52156e-26	2.25093	1.08713e-51
mmu-miR-361-3p*	-0.514568	0.00169405	-0.308634	0.102719	-0.823229	1.77849e-07
mmu-miR-361-5p*	0.194156	0.634585	0.337223	0.372474	0.531659	0.0590608
mmu-miR-362-5p*	2.16707	1.64864e-20	0.667892	0.00161983	2.83522	4.59226e-41
mmu-miR-365-2-5p	-0.824492	1.63955e-06	-1.30789	1.81624e-10	-2.13269	5.44292e-32
mmu-miR-374b-5p*	-0.258136	0.871505	-0.460829	0.801401	-0.719313	0.599178
mmu-miR-378a-3p*	2.61179	1.5053e-68	0.463483	0.00234825	3.07528	1.85206e-91
mmu-miR-378a-5p*	2.26389	2.40294e-29	0.304108	0.146605	2.56811	1.14689e-40
mmu-miR-378b	2.35584	3.90662e-44	0.640279	8.9335e-05	2.99617	3.86565e-72
mmu-miR-378c*	2.36201	2.59212e-52	0.300333	0.0685874	2.66236	5.15707e-68
mmu-miR-378d*	1.81639	4.96219e-08	0.864334	0.00210991	2.68145	2.99664e-22
mmu-miR-3963	-1.52237	0.28396	-0.313843	0.878268	-1.83666	0.169999
mmu-miR-3968	-0.98388	2.42816e-06	-0.910229	0.0011136	-1.89465	2.48308e-18
mmu-miR-421-3p	-0.480246	0.778852	0.542127	0.760601	0.0622315	0.981493
mmu-miR-423-3p*	-1.03203	0.00315368	-0.871468	0.0156446	-1.90352	2.68682e-08
mmu-miR-423-5p*	-1.21587	5.78457e-08	-1.96227	1.48072e-17	-3.1782	5.07468e-42
mmu-miR-425-5p*	-0.361469	0.156954	0.125443	0.756074	-0.235981	0.310742
mmu-miR-450a-5p*	1.96671	2.04454e-29	0.580867	0.000789942	2.54765	4.61927e-51
mmu-miR-450b-3p	0.299092	0.833144	2.24522	0.00125601	2.548	2.84459e-05
mmu-miR-450b-5p*	3.89118	3.05772e-66	-0.718115	0.000250579	3.17316	5.3608e-42
mmu-miR-455-5p*	-0.619631	0.146309	-0.15807	0.80377	-0.777829	0.0504623
mmu-miR-465a-3p	-0.230432	0.393145	-0.0395378	0.959497	-0.269996	0.254118
mmu-miR-465b-3p	-0.230432	0.393145	-0.0395378	0.959497	-0.269996	0.254118
mmu-miR-465c-3p	-0.230432	0.393145	-0.0395378	0.959497	-0.269996	0.254118
mmu-miR-465c-5p	0.244085	0.164338	0.358623	0.0423942	0.602731	0.000119955
mmu-miR-466i-5p	0.107238	0.83081	-1.98421	9.26217e-05	-1.88193	1.39861e-05
mmu-miR-470-5p	0.0828183	0.697149	-0.0954273	0.700617	-0.0126178	0.966279
mmu-miR-483-5p*	5.44468	9.53001e-160	-1.96544	2.84265e-33	3.47927	6.26129e-63
mmu-miR-484*	-0.40024	0.0245157	-0.359198	0.0743556	-0.75949	6.43276e-06
mmu-miR-486a-3p	2.18098	2.82424e-35	0.618112	0.000297125	2.79916	2.04124e-60
mmu-miR-486a-5p	1.47807	3.67342e-23	-0.0564635	0.790288	1.42161	8.28167e-22
mmu-miR-486b-5p	1.47807	3.67342e-23	-0.0564635	0.790288	1.42161	8.28167e-22
mmu-miR-497a-5p	-0.204532	0.818289	-0.551436	0.537599	-0.756905	0.238713
mmu-miR-499-5p	2.95148	1.31761e-50	2.06696	8.47116e-37	5.01865	6.926e-155
mmu-miR-500-3p	0.437057	0.338374	-0.768632	0.139456	-0.332982	0.463087
mmu-miR-501-3p*	1.59797	1.17811e-12	0.292142	0.26911	1.89011	2.77904e-17
mmu-miR-503-5p*	2.37738	1.6797e-39	-0.471848	0.0102519	1.90552	5.56252e-26
mmu-miR-5099	-1.88117	4.75753e-31	-0.126143	0.613696	-2.00734	9.09241e-36
mmu-miR-5126	1.41774	5.18007e-17	-3.23963	1.82932e-52	-1.82285	3.94174e-17
mmu-miR-532-5p*	1.37047	3.26628e-21	0.420593	0.00614945	1.79106	6.91136e-35
mmu-miR-542-3p*	2.89076	3.16688e-60	0.203603	0.289773	3.09442	1.12661e-70
mmu-miR-574-5p*	0.393718	0.0116977	-1.37421	2.76994e-19	-0.980526	6.89935e-11
mmu-miR-598-3p*	-0.260785	0.871505	1.00686	0.537599	0.746793	0.591313
mmu-miR-615-3p*	0.482885	0.00130785	-2.0241	4.4e-42	-1.54123	5.56252e-26
mmu-miR-615-5p*	-0.594282	0.119749	-2.13987	0.000195889	-2.74133	2.08922e-10
mmu-miR-6239	-0.100832	0.852557	0.453336	0.353453	0.353054	0.290047
mmu-miR-6412	0.656358	0.114037	-2.50953	2.28888e-08	-1.85545	1.93179e-05
mmu-miR-652-3p*	0.0949361	0.871505	0.532271	0.145013	0.627639	0.0209398
mmu-miR-664-5p	0.382286	0.0844218	0.123194	0.671572	0.505519	0.010046
mmu-miR-669c-5p	0.291074	0.0855012	-0.937283	1.21553e-08	-0.646265	4.46605e-05
mmu-miR-671-3p*	-0.864555	4.05049e-07	-1.26051	5.47683e-10	-2.12535	2.18587e-32
mmu-miR-671-5p*	-0.819745	0.0253215	-1.08314	0.0562386	-1.90572	6.8587e-07
mmu-miR-674-3p	0.44704	0.00338412	-2.12165	4.97722e-44	-1.67466	4.69382e-29
mmu-miR-675-5p*	1.81736	0.000228895	0.914182	0.021364	2.73326	1.53238e-12
mmu-miR-677-5p	0.234836	0.831976	1.21959	0.0276338	1.45751	0.000461651
mmu-miR-690	0.964506	0.0294801	-0.422588	0.456967	0.541352	0.226739
mmu-miR-6944-3p	0.727025	0.639825	-1.13691	0.485892	-0.411249	0.779397
mmu-miR-6945-3p	0.884554	0.0286051	-1.61448	0.00113799	-0.733539	0.160392
mmu-miR-708-3p*	0.482378	0.00304246	0.0140475	0.960415	0.496428	0.00150167
mmu-miR-708-5p*	0.241503	0.511717	0.836397	0.00871459	1.07829	8.57911e-05
mmu-miR-741-3p	0.138104	0.662263	1.00208	8.60415e-05	1.14063	7.21701e-08
mmu-miR-743b-3p	0.329136	0.851151	1.16352	0.456967	1.49338	0.258024
mmu-miR-744-5p*	0.283114	0.0755512	-0.786415	1.94658e-07	-0.503309	0.000671633
mmu-miR-760-3p	0.724396	0.0932566	-1.55312	0.00236491	-0.832534	0.0946249
mmu-miR-7a-5p	-0.227199	0.157532	-0.113743	0.549994	-0.340943	0.0237203
mmu-miR-8103	0.182971	0.918564	-4.36526	0.00881728	-4.20169	0.00506976
mmu-miR-871-3p	-0.200442	0.240083	-0.445927	0.00711373	-0.646387	2.27385e-05
mmu-miR-872-3p	0.560306	0.741061	-0.246795	0.916042	0.313263	0.847778
mmu-miR-872-5p	0.954529	3.4122e-09	0.493926	0.00325761	1.44849	1.22403e-20
mmu-miR-877-5p*	-0.0134257	1	-1.40768	0.376339	-1.42359	0.300464
mmu-miR-878-5p	0.319217	0.14621	0.896525	6.58993e-06	1.21592	7.32685e-12
mmu-miR-881-3p	0.109558	0.561826	0.738183	4.97318e-06	0.847774	2.43993e-08
mmu-miR-92a-3p*	-1.02463	3.10156e-12	-0.572621	0.000218677	-1.59726	1.03225e-27
mmu-miR-92b-3p*	-1.70849	7.73147e-21	-1.93533	2.86077e-13	-3.645	7.81826e-64
mmu-miR-93-5p*	-0.959565	3.02075e-09	-0.0112397	0.968393	-0.970811	6.92154e-10
mmu-miR-9-5p*	0.767466	3.68438e-07	-0.127711	0.505207	0.639754	1.92233e-05
mmu-miR-96-5p*	-0.469656	0.132432	-0.144454	0.809776	-0.614287	0.0293669
mmu-miR-98-5p*	0.661891	3.05829e-05	-0.00795123	0.968393	0.653943	2.42994e-05
mmu-miR-99a-5p*	-0.512926	0.000621445	-0.00764142	0.968393	-0.520568	0.000387207
mmu-miR-99b-3p*	0.169997	0.326612	-0.816731	2.15319e-07	-0.646762	2.13738e-05
mmu-miR-99b-5p*	0.142518	0.394594	-1.2074	1.32325e-16	-1.06489	1.34601e-13
43526	0.225631	0.0441544	0.204934	0.0904923	0.430559	6.38551e-05
43529	-0.118807	0.167527	0.0144041	0.92177	-0.104402	0.237124
43530	0.378396	0.000245353	0.369579	0.000682384	0.747973	8.28924e-14
43531	0.276574	0.00180494	0.097025	0.379368	0.373596	2.21485e-05
43532	0.538698	8.29188e-13	-0.156638	0.0746483	0.382058	9.4102e-07
43533	0.309122	0.101834	0.343344	0.0787942	0.652439	0.000236421
43535	0.937509	1.43773e-07	-0.847649	6.65135e-06	0.0898503	0.70002
43710	0.345835	0.000533497	-0.094569	0.468912	0.251266	0.0134991
43713	-0.0840416	0.406324	0.452448	7.15097e-07	0.368404	3.24806e-05
43714	-0.963794	9.24099e-08	-0.0368028	0.926014	-1.00057	5.47406e-08
43715	0.0189456	0.881965	-0.156482	0.208023	-0.137536	0.208985
43716	-0.468732	3.81595e-06	-0.109708	0.413742	-0.578439	1.10406e-08
43717	0.319265	0.00134198	-0.387071	0.000223048	-0.0678058	0.541559
43718	0.417242	2.8845e-06	-0.200467	0.0491288	0.216772	0.024214
43719	-0.17867	0.0891485	-0.0107383	0.953086	-0.189408	0.0703063
43723	-0.48499	9.54716e-07	0.167166	0.163374	-0.317824	0.00163039
0610007C21Rik	0.535732	1.50184e-08	0.0409441	0.771651	0.576669	2.12303e-09
0610007N19Rik	0.843418	1.95818e-06	0.231165	0.24663	1.07453	1.20545e-09
0610007P08Rik	0.112497	0.575461	-0.284487	0.176804	-0.171988	0.38511
0610007P14Rik	-0.0720474	0.739848	0.0890666	0.7387	0.0170196	0.957606
0610007P22Rik	0.118791	0.568281	-0.0187586	0.962088	0.10003	0.644332
0610009B22Rik	0.11941	0.553717	0.0464631	0.873073	0.16587	0.392444
0610009D07Rik	-0.047166	0.708868	0.0469831	0.776963	-0.000182643	1
0610009O20Rik	0.0772163	0.473276	-0.092705	0.471735	-0.0154888	0.921185
0610010B08Rik	-0.236125	0.197378	0.116614	0.641657	-0.119504	0.548295
0610010F05Rik	-0.0387079	0.770454	0.108436	0.439498	0.069727	0.57371
0610010K14Rik	-0.824133	1.71907e-25	0.447283	2.97632e-07	-0.376847	2.63457e-06
0610011F06Rik	0.207373	0.323341	0.216969	0.361603	0.424321	0.0323428
0610011L14Rik	0.22708	0.0283315	0.0291869	0.866527	0.256264	0.0142876
0610012G03Rik	-0.0511438	0.821932	0.554401	0.00320481	0.503251	0.00440326
0610030E20Rik	0.468031	0.00898126	-0.0529092	0.847719	0.415112	0.0237519
0610031J06Rik	-0.608751	1.54121e-13	-0.216988	0.0371366	-0.825732	2.30194e-22
0610037L13Rik	0.57125	0.00149841	0.0279185	0.929631	0.599154	0.00093593
0610037P05Rik	-0.206587	0.0591456	-0.0823973	0.595474	-0.288979	0.0095314
0610039K10Rik	0.612007	0.000912023	-0.314529	0.149042	0.297467	0.137348
0610040F04Rik	1.67262	1.53597e-12	0.190181	0.477968	1.86259	3.74149e-15
0910001L09Rik	-0.0108711	0.96864	-0.030636	0.929631	-0.0415063	0.856746
1110001A16Rik	-0.398481	0.0131204	0.595825	0.000316054	0.197345	0.225785
1110001J03Rik	-0.182897	0.403195	0.142414	0.634077	-0.0404769	0.908423
1110002B05Rik	-0.88638	7.61098e-23	0.32706	0.00234872	-0.559313	6.64412e-10
1110002L01Rik	-0.160792	0.395855	-0.328247	0.115573	-0.489032	0.00629897
1110002N22Rik	0.193359	0.274284	0.160345	0.447597	0.353694	0.0365821
1110003E01Rik	-1.0214	2.36563e-31	0.149002	0.223351	-0.87239	1.11459e-22
1110004E09Rik	-0.247604	0.138843	0.346304	0.053321	0.0987002	0.591838
1110004F10Rik	-0.355484	2.48705e-05	0.00111312	1	-0.354368	3.75965e-05
1110005A03Rik	0.145415	0.12542	0.0908962	0.433273	0.23631	0.0107262
1110007C09Rik	-0.936441	1.42619e-19	1.05689	5.81215e-24	0.120458	0.255257
1110008F13Rik	-0.466819	6.32527e-09	0.236809	0.0105359	-0.230008	0.00578543
1110008J03Rik	-0.17821	0.394717	0.275378	0.231804	0.0971673	0.672088
1110008L16Rik	-0.0374115	0.857879	0.0587019	0.820002	0.0212903	0.938907
1110008P14Rik	-0.403879	0.0307325	0.901551	8.88803e-07	0.497669	0.00514354
1110012J17Rik	0.87072	1.88723e-23	-0.277578	0.00302088	0.593135	1.17226e-10
1110012L19Rik	-0.975291	6.47219e-10	0.533978	0.00423682	-0.441291	0.00538727
1110014N23Rik	-0.169077	0.13668	-0.0192555	0.927287	-0.188329	0.101004
1110017F19Rik	4.85058	2.53814e-55	-1.20646	7.21812e-10	3.64255	3.47871e-21
1110018G07Rik	0.261758	0.00237645	-0.274629	0.00323715	-0.0128712	0.914756
1110018J18Rik	-0.210157	0.294511	0.373993	0.0785255	0.163835	0.416311
1110021J02Rik	0.189311	0.10175	-0.154292	0.263576	0.0350169	0.805814
1110021L09Rik	0.400367	0.032618	-0.445154	0.0298586	-0.0447898	0.850051
1110031I02Rik	0.607493	0.00336035	0.303199	0.16053	0.910636	4.77558e-06
1110034A24Rik	-0.386204	0.000194827	-0.0499139	0.748139	-0.436117	2.6391e-05
1110034B05Rik	-0.0170842	0.976592	-0.208724	0.427751	-0.225798	0.306853
1110037F02Rik	-0.0366057	0.708125	-0.223141	0.0178128	-0.259745	0.00254045
1110038B12Rik	-1.20016	1.29662e-38	-0.0442872	0.800238	-1.24443	9.89514e-39
1110038D17Rik	0.258911	0.0223752	0.0362334	0.835902	0.295139	0.0104417
1110038F14Rik	0.221682	0.027842	-0.331714	0.002096	-0.110031	0.327403
1110051M20Rik	0.251546	0.00174007	-0.0756636	0.470599	0.175882	0.0355174
1110054O05Rik	-0.760138	2.59636e-05	-0.00379224	1	-0.76391	3.32694e-05
1110057K04Rik	-0.385989	0.00017393	-0.174022	0.1924	-0.560003	1.14967e-07
1110058L19Rik	0.242835	0.199782	0.16877	0.458193	0.411589	0.0201089
1110059E24Rik	-0.511342	0.00448191	-0.157781	0.541525	-0.669107	0.000243802
1110059G10Rik	-0.461007	0.00849714	0.152755	0.55621	-0.308235	0.0950201
1110065P20Rik	-0.075436	0.720885	0.287118	0.165302	0.21168	0.259717
1190002N15Rik	0.783502	1.33002e-14	-0.405528	0.000222862	0.377971	0.00037298
1190005F20Rik	0.218713	0.0485981	0.0815913	0.579815	0.3003	0.00661969
1190007F08Rik	0.317433	0.0980075	0.233976	0.296445	0.551397	0.00278552
1200011I18Rik	-0.447421	4.58479e-06	0.261123	0.0218567	-0.186295	0.0710021
1200011M11Rik	-0.259809	0.0129214	-0.132327	0.328585	-0.392131	0.000232743
1200014J11Rik	0.422543	2.71308e-06	-0.448783	2.49345e-06	-0.0262414	0.830551
1300001I01Rik	0.685081	1.61206e-11	0.101272	0.449486	0.78635	9.23276e-15
1300002E11Rik	-0.0425676	0.974068	0.1454	0.874304	0.102827	0.891193
1300010F03Rik	0.424795	9.26438e-07	0.0898326	0.415094	0.514624	2.88271e-09
1300014I06Rik	-0.978131	6.22735e-08	0.463773	0.0415756	-0.514322	0.00513474
1300018I17Rik	0.278943	0.143175	-0.0290685	0.926014	0.249868	0.201691
1300018J18Rik	-0.299191	0.00563122	0.418119	0.000192357	0.118928	0.298496
1500001M20Rik	-0.292294	0.100287	-0.219566	0.358723	-0.511838	0.00527026
1500002O20Rik	-0.285248	0.0786075	0.272654	0.141885	-0.0125912	0.966759
1500003O03Rik	-0.523284	3.30409e-12	0.0376332	0.752705	-0.485649	1.94293e-10
1500004A13Rik	-0.199345	0.243078	-0.196964	0.376846	-0.396296	0.020921
1500011B03Rik	-0.485032	0.0138882	0.189221	0.497408	-0.295788	0.156876
1500011H22Rik	-0.899764	2.96486e-07	-0.205656	0.41698	-1.10539	7.19785e-10
1500011K16Rik	0.158097	0.418452	0.646557	7.3561e-05	0.804632	3.49195e-07
1500012F01Rik	-1.54455	3.61816e-84	-0.0033716	0.998753	-1.54791	7.1282e-77
1500031L02Rik	-0.245129	0.276978	0.59779	0.00641957	0.352653	0.0908845
1500032L24Rik	0.0287983	0.773169	0.305318	0.000362002	0.334115	3.71198e-05
1600002H07Rik	-0.633637	0.00138298	-0.239216	0.417087	-0.872794	2.86309e-05
1600012F09Rik	0.13239	0.209509	0.0798629	0.547839	0.212251	0.0395544
1600012H06Rik	0.0103876	0.936299	0.235098	0.0287392	0.245483	0.0133187
1600014C10Rik	-1.19081	2.08675e-12	0.621976	0.0024395	-0.568804	0.000679782
1600020E01Rik	1.05	7.32447e-08	-0.309901	0.166777	0.74004	0.000477864
1600027N09Rik	-0.131846	0.536868	0.107617	0.693777	-0.0242272	0.928365
1700001G11Rik	-0.361674	0.0733587	-0.0152934	0.983397	-0.376944	0.0778915
1700003F17Rik	5.26703	1.3085e-78	-0.162392	0.408935	5.10316	4.83993e-68
1700007J10Rik	-0.0681343	0.569301	-0.739113	9.45571e-11	-0.807237	3.21471e-13
1700012B15Rik	0.117605	0.321337	-0.106408	0.459748	0.0111958	0.95852
1700017B05Rik	0.0554873	0.595452	-0.36362	0.000254795	-0.308131	0.00142758
1700018L02Rik	0.885798	6.42103e-05	0.287332	0.239423	1.17303	7.2322e-08
1700019E19Rik	0.751842	3.27911e-05	-0.506759	0.0111061	0.245071	0.226703
1700020I14Rik	0.925802	3.69176e-18	0.165622	0.159205	1.0914	1.31218e-24
1700020O03Rik	0.0108842	0.946978	-0.195188	0.144627	-0.184302	0.12495
1700021F05Rik	0.441275	0.0244646	0.451804	0.0260361	0.893056	1.48386e-06
1700021K19Rik	0.390653	5.12832e-06	-0.0626906	0.595474	0.327959	0.000208734
1700025G04Rik	0.57875	0.00151404	0.474286	0.00692131	1.05299	7.18227e-10
1700029F09Rik	-0.430136	0.0196082	-0.171469	0.523819	-0.601574	0.00175206
1700030K09Rik	0.161123	0.440655	-0.287125	0.202256	-0.126	0.587067
1700034H14Rik	-0.0150557	0.958157	0.0952281	0.717454	0.0801713	0.706257
1700034P13Rik	0.0553898	0.851812	-0.31838	0.213595	-0.262978	0.273151
1700037H04Rik	-1.04107	9.11876e-10	0.201081	0.397033	-0.839974	1.00322e-06
1700040I03Rik	0.326067	0.128631	0.102298	0.72317	0.428338	0.0444286
1700049G17Rik	0.329065	0.147689	0.219799	0.402511	0.548828	0.00992289
1700052K11Rik	0.226083	0.182713	-0.389455	0.0343887	-0.16337	0.386203
1700052N19Rik	0.643414	4.59581e-09	0.0798878	0.580703	0.723288	7.47427e-11
1700066M21Rik	0.334675	0.0977963	0.257492	0.261231	0.59215	0.0024497
1700088E04Rik	0.280503	0.128903	-0.497786	0.0108516	-0.217282	0.268836
1700113A16Rik	1.81734	2.35188e-19	0.27569	0.156547	2.09287	8.46523e-26
1700123O20Rik	0.0429142	0.718814	-0.43135	0.000121325	-0.388432	0.000350032
1810006K21Rik	-0.34311	0.000384657	0.130462	0.299753	-0.212645	0.0344333
1810008A18Rik	-0.360892	0.000242633	-0.0723223	0.617441	-0.433209	1.66101e-05
1810009A15Rik	-0.326621	0.00141451	-0.187471	0.152002	-0.514084	1.07651e-06
1810011O10Rik	0.439762	0.502186	0.187824	0.838418	0.627526	0.30162
1810012P15Rik	0.425589	0.0249877	0.158411	0.491803	0.58397	0.00193114
1810013D10Rik	0.589846	0.00114795	-0.25937	0.233953	0.330466	0.0867404
1810013L24Rik	0.0235464	0.8386	0.16145	0.12916	0.184995	0.0503266
1810014B01Rik	-0.156065	0.0454995	-0.0848461	0.389821	-0.240911	0.0018077
1810020D17Rik	2.97756	2.76761e-149	-0.195742	0.0506675	2.78174	6.7546e-122
1810022K09Rik	-0.00447295	0.978573	-0.088761	0.524705	-0.093233	0.431892
1810026J23Rik	-0.0172555	0.889221	0.583208	5.93845e-11	0.565949	9.52151e-11
1810027O10Rik	0.00452129	0.989572	0.31051	0.00742383	0.315028	0.00367779
1810030N24Rik	-0.202729	0.334461	0.337853	0.119586	0.135123	0.530582
1810030O07Rik	0.06121	0.595915	-0.202788	0.087712	-0.141577	0.200476
1810031K17Rik	-0.537983	8.97992e-10	0.341136	0.000516451	-0.196844	0.0322955
1810032O08Rik	-0.537975	0.000969327	0.251731	0.227491	-0.28623	0.0919853
1810035L17Rik	-0.136882	0.230477	-0.17611	0.187021	-0.312987	0.00531293
1810037I17Rik	-0.446404	2.89742e-05	0.359427	0.00237731	-0.0869742	0.463787
1810043G02Rik	-0.807112	9.44315e-07	0.224553	0.35005	-0.582531	0.000533433
1810043H04Rik	-0.273136	0.171076	0.159342	0.528613	-0.113785	0.610773
1810046J19Rik	0.0762548	0.527688	0.160589	0.219236	0.236841	0.0350419
1810048J11Rik	-0.447384	0.0196082	0.533718	0.00942452	0.0863377	0.684428
1810049H13Rik	-0.192091	0.458158	0.581934	0.0161838	0.389829	0.0855763
1810055G02Rik	0.206473	0.0325534	-0.448171	8.84229e-06	-0.241697	0.0182322
1810058I24Rik	-0.241492	0.0221035	0.359374	0.000993441	0.117882	0.283059
1810063B05Rik	-0.668259	6.56123e-05	0.579836	0.00165414	-0.0884111	0.657355
1810063B07Rik	0.655246	0.000105604	-0.0953235	0.682755	0.559896	0.001551
1810074P20Rik	0.903451	2.42917e-23	0.0144601	0.927287	0.917901	2.74557e-23
2010002N04Rik	-1.65111	6.24603e-58	0.323064	0.0232671	-1.32802	3.76526e-38
2010011I20Rik	-0.260601	0.191964	0.487858	0.0170978	0.227255	0.246861
2010012O05Rik	0.0115656	0.978903	0.00826288	1	0.0198276	0.977399
2010106G01Rik	0.219233	0.00735867	0.0773075	0.45882	0.296539	0.000255508
2010107E04Rik	0.714303	9.21437e-15	0.0829767	0.482224	0.797271	9.72454e-18
2010107H07Rik	0.601763	0.00546269	-0.054173	0.887381	0.547544	0.0142806
2010109K11Rik	-0.440061	0.00639464	0.208107	0.3185	-0.231943	0.181256
2010111I01Rik	1.37172	4.45048e-57	0.192263	0.0321896	1.56397	1.42236e-73
2010305A19Rik	-0.100823	0.598576	0.0790727	0.760057	-0.0217482	0.938576
2010315B03Rik	0.00481595	1	0.156128	0.543146	0.160938	0.440814
2010320M18Rik	0.165696	0.514485	0.153377	0.612701	0.319051	0.173683
2010321M09Rik	0.176206	0.107853	-0.308684	0.00861749	-0.132477	0.26904
2200002D01Rik	-1.34091	9.65811e-15	0.129517	0.694351	-1.21132	7.64876e-12
2210009G21Rik	0.188045	0.401172	-0.430122	0.0809761	-0.242068	0.326361
2210013O21Rik	-0.478654	0.011051	0.158942	0.529265	-0.319702	0.100095
2210015D19Rik	0.235667	0.155117	-0.0470001	0.857052	0.18866	0.284367
2210016F16Rik	-0.774096	0.000112505	0.623056	0.00578118	-0.151016	0.486526
2210016L21Rik	-0.315599	0.00375551	-0.0777348	0.63371	-0.393327	0.000407866
2210018M11Rik	0.249089	0.0218138	-0.606353	9.48929e-08	-0.35726	0.00219484
2210020M01Rik	4.98955	7.36303e-228	-0.809871	6.46694e-18	4.17932	3.30438e-127
2210021J22Rik	-0.391104	0.0419435	0.178322	0.482008	-0.212766	0.293734
2210403K04Rik	1.13489	8.01997e-43	-0.229559	0.0108563	0.905327	2.32141e-25
2210404J11Rik	0.103405	0.570586	0.0482589	0.863594	0.151659	0.395421
2300009A05Rik	-0.114114	0.869636	0.50844	0.494655	0.394306	0.538311
2310001A20Rik	-0.114156	0.342512	0.15831	0.252066	0.0441544	0.736441
2310002L13Rik	-4.19944	2.74212e-295	-0.179771	0.569073	-4.37908	5.34916e-283
2310003C23Rik	0.265771	0.00800506	0.0603954	0.661745	0.326162	0.00118192
2310003F16Rik	0.336942	5.02453e-05	-0.115965	0.257197	0.220976	0.0113431
2310003H01Rik	-0.470004	0.00835422	0.0310995	0.923293	-0.438895	0.0150753
2310004I24Rik	-0.30082	0.0738546	-0.364431	0.0671955	-0.665228	8.88627e-05
2310008H04Rik	-0.293868	0.0628233	-0.215022	0.294393	-0.508875	0.0017003
2310008H09Rik	-0.54668	1.93924e-11	-0.273592	0.00543149	-0.820266	1.31038e-22
2310009A05Rik	0.758043	0.217137	-0.00401497	1	0.753939	0.227396
2310009B15Rik	0.379163	0.0928298	0.417601	0.0616109	0.796712	0.000135043
2310011J03Rik	-0.619028	8.41998e-10	0.00580534	0.996756	-0.613213	3.899e-09
2310015A10Rik	1.58954	6.10348e-14	-0.171021	0.493028	1.41837	2.06362e-10
2310015B20Rik	3.80087	3.52486e-08	-0.215571	0.806192	3.5839	3.36699e-07
2310016M24Rik	0.585954	1.95069e-12	0.318331	0.000189308	0.90428	1.08864e-28
2310021P13Rik	-0.102707	0.365284	-0.269791	0.0212038	-0.372497	0.00039489
2310022A10Rik	0.607296	5.78729e-10	0.133916	0.24747	0.741202	3.85259e-14
2310022B05Rik	1.40293	5.71686e-44	-0.376062	0.000555247	1.02686	1.12967e-23
2310028H24Rik	-0.0185501	0.969414	0.643975	0.003468	0.625395	0.00284978
2310033P09Rik	-0.0419448	0.866198	-0.22298	0.315403	-0.264916	0.159882
2310035C23Rik	0.243712	0.0102221	-0.282106	0.00610371	-0.0383944	0.745005
2310035K24Rik	-0.131605	0.470188	0.637581	7.22241e-05	0.505967	0.000948051
2310036O22Rik	-0.539453	9.08893e-12	0.0836598	0.452011	-0.45579	1.54085e-08
2310039H08Rik	0.55504	0.00188701	0.116622	0.634671	0.67163	0.000162904
2310044G17Rik	0.598066	6.37139e-10	0.127714	0.267651	0.725772	6.10211e-14
2310045N01Rik	-0.203114	0.252477	-0.281445	0.188178	-0.484542	0.00585291
2310046O06Rik	-0.297574	0.120084	-0.0570461	0.852391	-0.354611	0.0641677
2310047B19Rik	-0.166644	0.522777	0.24573	0.377526	0.0790872	0.794041
2310047M10Rik	0.145955	0.495106	0.601481	0.00182516	0.747421	4.39917e-05
2310050B05Rik	4.74691	6.22292e-10	0.264482	0.741015	5.00849	4.79327e-11
2310057M21Rik	0.159165	0.379732	-0.341058	0.0765999	-0.181889	0.341735
2310061C15Rik	-0.217635	0.266142	0.460066	0.0191023	0.242427	0.199658
2310061I04Rik	-0.568007	0.00198607	0.336757	0.123112	-0.231241	0.237262
2310061J03Rik	-0.32702	0.159634	0.132357	0.692508	-0.194642	0.460107
2310067B10Rik	0.332707	0.000236202	0.0097498	0.956661	0.342454	0.000200273
2310079F23Rik	-0.368701	0.0479292	0.0815172	0.803806	-0.287167	0.148647
2400003C14Rik	-0.147152	0.0808583	-0.0441202	0.712849	-0.191272	0.0231495
2410001C21Rik	-0.255196	0.00284165	-0.0966333	0.394584	-0.351827	4.64411e-05
2410002F23Rik	-0.15894	0.107675	-0.109591	0.382696	-0.268529	0.00636485
2410002I01Rik	0.0506229	0.830375	0.0700876	0.815648	0.120708	0.576824
2410002O22Rik	0.184293	0.0380756	0.0912629	0.405131	0.275554	0.00162383
2410003K15Rik	-0.695406	3.77009e-05	0.705661	9.68929e-05	0.0102655	0.98187
2410004B18Rik	-0.20788	0.24204	0.256373	0.197057	0.048495	0.806744
2410006H16Rik	-1.82528	2.55015e-122	0.400282	4.03303e-05	-1.42498	2.88965e-75
2410015M20Rik	-0.118695	0.240669	0.566405	5.69016e-10	0.447709	5.57865e-07
2410016O06Rik	-0.297298	0.0797717	0.28249	0.149026	-0.0148039	0.962432
2410017P09Rik	0.745571	2.5554e-05	-0.438651	0.0239449	0.306895	0.133647
2410018M08Rik	0.168247	0.0642521	0.184041	0.0602966	0.352286	5.13207e-05
2410022L05Rik	-0.00239127	1	-0.0180724	0.955096	-0.020463	0.958417
2410042D21Rik	0.773592	4.22477e-17	-0.221933	0.0296977	0.551651	1.30183e-08
2410089E03Rik	-0.547243	9.47685e-11	-0.175938	0.108295	-0.723175	8.14653e-17
2410091C18Rik	0.264826	0.161796	0.0273585	0.933585	0.292179	0.123594
2410127L17Rik	-0.442246	2.44121e-05	0.852828	2.76505e-17	0.410581	2.89632e-05
2410131K14Rik	0.1485	0.381489	-0.247126	0.195885	-0.0986255	0.592752
2500003M10Rik	0.279696	0.00836839	-0.0340365	0.833708	0.245659	0.0219904
2510003E04Rik	-0.308184	0.0009474	0.303122	0.00273281	-0.0050607	0.977036
2510009E07Rik	0.262682	0.167361	-0.116984	0.641468	0.145693	0.484952
2510039O18Rik	-0.284519	0.000524194	0.245941	0.00642617	-0.0385772	0.68705
2610001J05Rik	-0.270189	0.0150595	0.201598	0.121314	-0.0685882	0.586751
2610002J02Rik	-0.597	0.000225184	0.390719	0.0401019	-0.206269	0.232372
2610002M06Rik	-0.520679	0.00494275	0.164601	0.524039	-0.356067	0.0604395
2610005L07Rikchr8-	0.0546142	0.582844	-0.279387	0.00380364	-0.224771	0.0148002
2610008E11Rik	0.392847	0.000190729	-0.234459	0.050068	0.158384	0.187131
2610015P09Rik	-0.536957	0.00512229	-0.406997	0.120895	-0.943897	3.64555e-06
2610020C07Rik	0.209925	0.296459	-0.0213456	0.958464	0.188574	0.362254
2610027L16Rik	-0.221214	0.032793	-0.0557297	0.720348	-0.27694	0.00848996
2610029G23Rik	-0.251862	0.0162993	-0.239419	0.0556051	-0.491274	4.08379e-06
2610029I01Rik	0.0911484	0.686999	0.164293	0.512715	0.255435	0.197407
2610034B18Rik	-0.831584	2.32334e-06	0.0235585	0.950947	-0.808006	5.82106e-06
2610039C10Rik	-1.37248	4.11174e-14	-0.506062	0.074615	-1.87842	9.45779e-21
2610044O15Rik	-0.325009	0.0850714	0.452626	0.0231687	0.127619	0.533351
2610203C20Rik	-1.56669	2.08679e-61	-0.234406	0.0997254	-1.80107	9.45953e-72
2610301B20Rik	0.167258	0.399943	0.378624	0.0604891	0.545872	0.00238623
2610301G19Rik	0.119846	0.216292	-0.0630683	0.619659	0.0567769	0.594452
2610507B11Rik	-0.282209	0.0058887	0.258243	0.0220843	-0.0239664	0.842883
2610524H06Rik	-0.527613	0.0102189	0.59264	0.00784532	0.0650371	0.825448
2610528E23Rik	-1.2947	3.59009e-13	0.521148	0.0240177	-0.773503	1.13862e-05
2700007P21Rik	-0.726514	2.00522e-21	-0.260541	0.00529003	-0.98705	3.61526e-36
2700029M09Rik	-0.174238	0.0977533	-0.350885	0.00255865	-0.525116	6.46253e-07
2700049A03Rik	0.123988	0.500471	-0.44572	0.0140021	-0.321725	0.0664381
2700050L05Rik	0.294985	0.125857	0.0312476	0.926014	0.326224	0.0925919
2700060E02Rik	-0.129655	0.10827	0.0778387	0.442656	-0.0518164	0.554515
2700062C07Rik	-0.887456	3.62069e-07	-0.0120125	1	-0.899422	5.48779e-07
2700081O15Rik	-0.210542	0.0208865	-0.0771422	0.537264	-0.287682	0.00174752
2700089E24Rik	-0.0314487	0.746392	0.184609	0.0431669	0.15316	0.0687874
2700094K13Rik	-0.714899	3.36578e-05	-0.582192	0.00479237	-1.29706	3.48506e-13
2700097O09Rik	0.905688	3.23728e-06	-0.360324	0.108383	0.545315	0.0116701
2810002N01Rik	-0.0169057	0.946407	0.104163	0.674496	0.0872562	0.673098
2810004N23Rik	0.256287	0.00845378	-0.0416316	0.774968	0.214652	0.0325888
2810006K23Rik	0.0871583	0.667844	0.270506	0.168441	0.357654	0.0353
2810008D09Rik	-0.0447263	0.867561	0.375428	0.0713228	0.330692	0.0812099
2810008M24Rik	-0.739463	1.19011e-17	0.241445	0.0222897	-0.498013	1.49442e-08
2810013P06Rik	0.208637	0.350442	0.0840096	0.791131	0.292629	0.190246
2810021B07Rik	-0.232292	0.223393	0.137496	0.592612	-0.0947918	0.652011
2810021J22Rik	0.0303207	0.919118	-0.052444	0.87003	-0.022123	0.94456
2810025M15Rik	0.693645	1.07376e-11	-0.0879125	0.509406	0.605722	1.10617e-08
2810046L04Rik	0.0960903	0.649478	-0.0094711	0.990209	0.0866171	0.6808
2810047C21Rik1	-0.406585	0.0418688	-0.057771	0.875775	-0.464326	0.0228741
2810403A07Rik	0.290658	0.00151956	0.0059452	0.980588	0.296601	0.00149352
2810407C02Rik	0.241905	0.0207185	0.0460973	0.760057	0.288001	0.00541995
2810408M09Rik	0.0885605	0.635821	0.0709759	0.760897	0.159532	0.367029
2810417H13Rik	-0.626418	3.22063e-11	-0.78068	1.13039e-11	-1.40708	2.47558e-41
2810422J05Rik	-0.33467	0.0673552	0.280585	0.189366	-0.0540819	0.800893
2810428I15Rik	-0.161714	0.130107	0.319719	0.00349824	0.158004	0.136457
2810432D09Rik	0.0883077	0.660025	0.409468	0.0187515	0.497763	0.00212439
2810453I06Rik	-0.0789118	0.49811	0.295141	0.00798082	0.216228	0.0411862
2810474O19Rik	0.668118	8.98441e-19	0.292387	0.000210022	0.960502	4.76087e-38
2900002K06Rik	-0.0627862	0.766954	-0.0601743	0.832472	-0.122958	0.536528
2900010M23Rik	-0.0999817	0.280521	0.215711	0.0236641	0.115729	0.205438
2900026A02Rik	1.02038	5.91234e-32	0.437371	1.19405e-07	1.45774	1.28693e-65
2900053A13Rik	-0.418707	0.0583754	0.196842	0.536898	-0.221842	0.361794
2900056M20Rik	-0.174128	0.360837	-0.15084	0.542361	-0.324955	0.0863838
2900092E17Rik	0.119663	0.348692	0.362862	0.00194289	0.482518	1.39243e-05
2900097C17Rik	0.290093	0.00450779	-0.149361	0.223395	0.140732	0.190395
3000002C10Rik	0.903061	3.93668e-22	0.469718	8.59951e-08	1.37277	1.3564e-51
3010026O09Rik	-0.44727	0.0415068	-0.260084	0.40823	-0.7073	0.00181868
3110001D03Rik	-0.104969	0.615365	0.25215	0.25266	0.14718	0.455798
3110001I22Rik	-0.0197294	1	-0.309355	0.70611	-0.32906	0.621218
3110002H16Rik	0.0403601	0.752805	0.124666	0.352009	0.165024	0.151034
3110003A17Rik	0.33251	3.55845e-05	-0.777657	5.37437e-21	-0.445145	1.98032e-07
3110040N11Rik	-0.503696	0.00567882	0.0209777	0.985295	-0.482692	0.00994291
3110043O21Rik	0.229067	0.22536	0.30422	0.135645	0.533278	0.00237212
3110056O03Rik	-0.431941	4.49925e-05	0.657832	5.29027e-10	0.225891	0.031021
3110062M04Rik	0.690255	0.000132826	0.0292737	0.928166	0.719511	7.74154e-05
3110082I17Rik	-0.505252	0.00643062	-0.07594	0.806363	-0.581177	0.00208044
3200002M19Rik	-0.465964	0.00772825	-0.332261	0.142898	-0.79819	9.99568e-06
3230401D17Rik	-0.425074	6.02218e-05	-0.115891	0.448147	-0.540956	8.13691e-07
3830403N18Rik	-0.202827	0.0695894	0.118138	0.40419	-0.0846875	0.494132
3830406C13Rik	0.0900485	0.658387	-0.249757	0.223756	-0.159705	0.413892
4632415K11Rik	-0.288185	0.153152	0.648318	0.000834972	0.360127	0.0544521
4632415L05Rik	-0.102261	0.590295	0.0782002	0.743781	-0.0240592	0.922877
4632419I22Rik	-0.149754	0.099883	-0.276394	0.00518582	-0.426145	1.82397e-06
4632428N05Rik	0.715154	0.000239637	0.495235	0.0131397	1.21035	9.25309e-11
4632434I11Rik	-1.74372	8.84196e-25	-0.372504	0.202987	-2.11611	2.68005e-30
4732418C07Rik	-0.163353	0.0822311	-0.0598931	0.649479	-0.223245	0.0179478
4732471D19Rik	-0.609707	0.000194661	-0.273647	0.224784	-0.88332	2.24913e-07
4831426I19Rik	-0.0851879	0.464677	-0.588902	3.36126e-07	-0.674081	1.1713e-09
4833420G17Rik	-0.874166	3.76041e-08	-0.0923982	0.763714	-0.966525	4.82923e-09
4833422C13Rik	1.14289	9.65397e-08	-0.409982	0.0783915	0.732818	0.00228322
4833439L19Rik	0.719451	1.0624e-22	-0.352083	6.31824e-06	0.367366	2.09444e-06
4833442J19Rik	0.71379	6.82539e-05	0.978562	8.06267e-11	1.69229	2.22853e-26
4921517L17Rik	-0.886088	1.98811e-07	0.686542	0.000322829	-0.199527	0.270103
4921524J17Rik	0.475556	0.0128031	0.530414	0.00599151	1.00595	2.27427e-08
4922501C03Rik	0.0235545	0.935668	-0.399945	0.0702452	-0.376383	0.06311
4922505G16Rik	-0.699456	0.000120653	0.52877	0.0103748	-0.170668	0.392167
4930402H24Rik	-0.279866	0.0057073	-0.153738	0.240069	-0.433598	2.62588e-05
4930404N11Rik	0.784921	0.00015772	0.83048	2.62668e-06	1.61531	7.18368e-18
4930405P13Rik	-0.777256	3.81538e-07	0.50414	0.00454692	-0.273101	0.084783
4930413G21Rik	0.341591	0.0991841	0.0854406	0.790036	0.427006	0.0329994
4930414L22Rik	0.409119	0.0355115	-0.0490322	0.879712	0.360075	0.0715087
4930422G04Rik	-0.629411	0.000204518	-0.774042	0.000456118	-1.40339	6.80494e-14
4930427A07Rik	-0.564002	0.000388857	-0.409012	0.0500443	-0.972979	6.94479e-09
4930430F08Rik	-0.253811	0.174815	-0.0587091	0.844096	-0.312513	0.0944423
4930444A02Rik	-0.179823	0.353446	0.0775118	0.786097	-0.102309	0.628782
4930453N24Rik	0.129993	0.525386	-0.0131703	0.971593	0.11682	0.570702
4930455C13Rik	0.0173515	0.941777	0.113999	0.606383	0.131347	0.466437
4930455C21Rik	0.633154	5.15546e-10	0.0371272	0.805055	0.67027	9.03926e-11
4930455F23Rik	-0.226289	0.294601	-0.087208	0.794645	-0.313477	0.153765
4930470H14Rik	0.0451982	0.843487	-0.244678	0.310349	-0.199472	0.370087
4930471M23Rik	-0.476979	4.13239e-06	0.474253	1.76627e-05	-0.00272358	1
4930473A02Rik	0.327991	0.0703228	-0.367186	0.0689569	-0.039197	0.87069
4930483K19Rik	2.04126	0.000905309	-0.0680809	0.952292	1.9728	0.00147852
4930500J02Rik	1.44208	1.10849e-17	-0.417427	0.0164297	1.02459	2.13163e-08
4930503L19Rik	-0.9272	6.92654e-08	-0.0991434	0.717454	-1.02632	3.98131e-09
4930511M06Rik	0.266235	0.152112	-0.418603	0.0437911	-0.152367	0.485066
4930526I15Rik	-0.0958887	0.697923	-0.188702	0.478643	-0.284577	0.188445
4930534B04Rik	-0.659882	0.000815249	-0.417393	0.138032	-1.0772	2.99376e-07
4930539J05Rik	-0.043569	0.866638	-0.289155	0.243358	-0.332709	0.115344
4930547N16Rik	-0.677015	0.000371825	-0.595481	0.0214971	-1.27241	1.41362e-09
4930549G23Rik	0.497566	0.0128167	-0.285854	0.233419	0.211691	0.364046
4930572J05Rik	-0.0357635	0.890521	0.695849	0.000402947	0.660073	0.000385933
4930579G18Rik	0.624819	0.00163956	-0.395569	0.0730925	0.229225	0.345778
4930579G24Rik	-0.629356	0.00031316	-0.05184	0.892493	-0.681163	0.000161736
4931406C07Rik	0.0180449	0.891767	-0.282741	0.0153563	-0.264693	0.0164944
4931406P16Rik	0.614991	2.95784e-14	-0.678244	5.54183e-16	-0.0632539	0.533279
4931414P19Rik	0.00340356	1	0.404379	0.064549	0.407766	0.0411373
4931428F04Rik	0.261508	0.166818	-0.0417989	0.886143	0.219704	0.260141
4931440F15Rik	1.52779	3.81767e-13	0.438389	0.0203959	1.96603	2.12389e-22
4932411L15	0.479639	0.0143514	-0.884565	2.91479e-05	-0.404914	0.0821795
4932416H05Rik	-0.391336	0.53029	-0.298483	0.728694	-0.689766	0.254645
4932438A13Rik	0.62294	3.99018e-14	-0.195015	0.0375759	0.427921	7.23835e-07
4933403F05Rik	0.151063	0.0764345	0.171166	0.0635011	0.322227	7.69196e-05
4933404O12Rik	-0.380286	0.0154641	0.0604678	0.825226	-0.319807	0.0483412
4933407H18Rik	0.647063	0.000309878	-0.361083	0.0762958	0.28597	0.143593
4933407K13Rik	0.113005	0.881534	-0.417393	0.589362	-0.304371	0.657639
4933408J17Rik	-0.211572	0.226557	-0.351749	0.0822899	-0.563302	0.00114996
4933409K07Rikchr4-	0.550036	5.56639e-13	-0.10759	0.257134	0.442444	1.64791e-08
4933409K07Rikchr4+	0.461861	2.08151e-09	-0.0483085	0.659725	0.413551	1.45154e-07
4933411K20Rik	-0.09641	0.426087	-0.0224738	0.915068	-0.118882	0.332958
4933412E12Rik	-0.134887	0.626483	-0.23296	0.442907	-0.367822	0.123312
4933421E11Rik	-0.673758	3.80452e-11	0.200353	0.130208	-0.473397	5.22931e-06
4933424B01Rik	-0.427775	3.9897e-06	-0.0731768	0.601927	-0.500946	1.40464e-07
4933426M11Rik	1.34679	1.60715e-41	-0.0355453	0.818522	1.31124	3.82211e-39
4933427D14Rik	-0.0923101	0.62551	-0.27998	0.162454	-0.372279	0.0280612
4933431E20Rik	-0.0913152	0.675658	-0.667563	0.00154489	-0.758843	0.000109387
4933433P14Rik	-0.359806	0.0452523	-0.0260641	0.93901	-0.385863	0.0325995
4933434E20Rik	0.12946	0.181985	0.0541305	0.676758	0.183589	0.0550254
4933439F18Rik	-0.087273	0.413218	0.000224515	1	-0.0870474	0.417525
5031425E22Rik	0.357707	0.0357028	0.0220863	0.945845	0.379778	0.0283159
5031439G07Rik	-0.137478	0.110623	0.659149	5.73616e-17	0.52167	1.81807e-11
5033414D02Rik	-0.177954	0.366425	-0.405077	0.0611586	-0.583019	0.00203061
5330426P16Rik	-0.00742114	1	0.478019	0.0388616	0.470576	0.0271814
5430405H02Rik	-0.346435	0.0408685	-0.13361	0.60877	-0.480026	0.00658904
5430411K18Rik	-0.0098941	0.937948	0.20711	0.0370445	0.197215	0.0308517
5430416N02Rik	-0.6125	0.00132499	-0.0688517	0.846346	-0.681309	0.000595526
5430417L22Rik	0.104438	0.359611	-0.123776	0.350764	-0.0193382	0.903666
5430435G22Rik	-0.937875	2.12997e-07	-0.0170597	0.982036	-0.954879	3.84752e-07
5430437P03Rik	-0.443395	2.12502e-07	0.0588491	0.647776	-0.384542	1.09302e-05
5530601H04Rik	-0.643183	0.000151897	-0.226631	0.373981	-0.869774	1.08012e-06
5730403B10Rik	0.766327	4.38619e-18	-0.028601	0.835633	0.737719	3.37659e-16
5730419I09Rik	0.186122	0.361887	0.748906	6.39962e-05	0.93501	1.99976e-07
5730455P16Rik	-0.104733	0.305276	0.185875	0.0876057	0.0811421	0.438355
5730469M10Rik	-0.376313	0.0367619	-0.331975	0.153264	-0.708256	0.000153768
5730494M16Rik	-0.409494	0.0203092	-0.371645	0.0742526	-0.781125	9.2475e-06
5730494N06Rik	-0.227445	0.0365841	0.0228442	0.906624	-0.204597	0.0684361
5730508B09Rik	1.99213	6.05989e-16	1.08584	1.37493e-10	3.07767	9.01928e-47
5730528L13Rik	-0.175212	0.363926	-0.0499852	0.86913	-0.225193	0.241898
5730559C18Rik	0.895171	8.96435e-07	-0.465785	0.0211677	0.429369	0.0294199
5730590G19Rik	-0.442566	0.0160983	-0.686989	0.00293381	-1.12949	1.28831e-08
5830417I10Rik	-0.0207007	0.853781	-0.20985	0.0411991	-0.230549	0.0135276
5830418K08Rik	-0.267986	0.150337	-0.562633	0.00532258	-0.830602	5.22256e-06
5830433M19Rik	-0.326361	0.0385103	-0.0759374	0.756722	-0.402286	0.0117496
5930416I19Rik	-0.391355	0.0322185	-0.0653361	0.825363	-0.456681	0.012185
6030419C18Rik	0.172556	0.0510405	-0.0325417	0.806555	0.140014	0.126075
6030458C11Rik	0.24254	0.00618249	0.0693596	0.552907	0.311897	0.000414692
6230400D17Rik	-0.291751	0.657164	0.451832	0.558552	0.160081	0.831106
6230409E13Rik	-1.17839	1.06142e-11	-0.370271	0.112792	-1.54862	9.71483e-18
6330406I15Rik	0.715068	3.14897e-10	0.560205	5.63745e-08	1.27525	1.85521e-32
6330408A02Rik	0.325704	0.0840532	-0.134786	0.581966	0.190905	0.354736
6330409N04Rik	0.389144	0.0344776	0.26178	0.182994	0.650898	0.000208424
6330416G13Rik	-0.650785	0.000212089	0.1321	0.607759	-0.518673	0.00369153
6330503K22Rik	-0.183773	0.343182	-0.266537	0.236685	-0.450302	0.0151237
6330578E17Rik	-0.0655684	0.444849	0.199416	0.0198696	0.133847	0.097144
6430527G18Rik	0.121913	0.27136	-0.220571	0.0625259	-0.0986578	0.384503
6430548M08Rik	1.49615	5.01129e-14	0.936426	1.39103e-07	2.4325	1.06053e-37
6430562O15Rik	0.208751	0.382637	-0.342944	0.18404	-0.134191	0.634144
6430598A04Rik	-0.907751	9.28634e-06	0.45107	0.0783327	-0.456637	0.0256423
6530401N04Rik	-0.151092	0.397253	0.023556	0.956661	-0.127531	0.498401
6530418L21Rik	-0.21065	0.0590739	-0.186145	0.17671	-0.396789	0.000444613
6720401G13Rik	0.762919	1.91589e-13	-0.182978	0.128463	0.57993	1.18224e-07
6720456B07Rik	-0.108252	0.204692	0.0396121	0.740808	-0.0686399	0.444088
6720456H20Rik	-0.300372	0.119507	-0.214298	0.376417	-0.514658	0.00706138
6720463M24Rik	-0.385765	0.037693	-0.0553052	0.891678	-0.441047	0.0228468
6820431F20Rikchr8-	0.00781318	0.956426	-0.307834	0.00261363	-0.300019	0.00196908
8030462N17Rik	0.760651	2.6642e-15	-0.37335	0.00024518	0.387294	0.000240295
8430406I07Rik	-0.397927	0.0264922	-0.0115295	1	-0.409436	0.0280358
8430410A17Rik	-0.369975	0.0469158	0.138736	0.584478	-0.231233	0.232365
8430410K20Rik	0.0168217	0.885442	0.0911869	0.429137	0.108008	0.263618
8430419L09Rik	-0.528065	0.00058948	0.0443055	0.870561	-0.483743	0.00221229
8430429K09Rik	-0.469101	0.0237566	0.158347	0.627378	-0.310728	0.155638
9030025P20Rik	0.145119	0.455595	0.284153	0.153073	0.429257	0.0145369
9030617O03Rik	-0.821182	2.31956e-19	-0.451134	8.89555e-05	-1.2723	1.36259e-38
9030624J02Rik	-0.0699246	0.470926	-0.269162	0.00601356	-0.339084	0.0001648
9030625A04Rik	1.02381	2.4873e-08	-0.784928	5.25143e-05	0.238864	0.263865
9130011E15Rik	0.268952	0.172283	0.0718219	0.80733	0.340765	0.0825787
9130011J15Rik	0.279718	0.000703866	0.265496	0.00199333	0.545211	8.11961e-12
9130023H24Rik	0.0244901	0.922366	-0.504215	0.00638218	-0.479711	0.00584382
9130221H12Rik	-0.0456861	0.728902	0.0793362	0.59962	0.0336499	0.801557
9130401M01Rik	-0.603084	1.23487e-10	0.00395392	0.997867	-0.599122	4.66114e-10
9330133O14Rik	0.302992	0.647506	0.360162	0.644333	0.6631	0.273742
9330159F19Rik	0.339038	0.0838876	0.392204	0.0428589	0.731211	3.92026e-05
9430008C03Rik	-0.368481	0.0439729	-0.22442	0.338945	-0.592888	0.00121808
9430015G10Rik	-0.600838	6.4093e-05	-0.628941	0.000854307	-1.22974	2.29555e-14
9430016H08Rik	-0.0412269	0.848505	-0.27001	0.216605	-0.311232	0.100448
9430020K01Rik	-0.00778086	0.952427	0.214164	0.0266791	0.206382	0.0207584
9430023L20Rik	0.317977	0.0014886	0.47512	6.7957e-07	0.793089	3.70272e-17
9530027J09Rik	0.084402	0.696131	-0.448148	0.0285394	-0.363734	0.0588223
9530068E07Rik	-0.0214241	0.860914	-0.0676754	0.625337	-0.0890994	0.416711
9530082P21Rik	-0.171724	0.393786	-0.304588	0.171285	-0.476302	0.0116384
9630033F20Rik	-0.395624	0.0188256	0.130417	0.577017	-0.265195	0.128346
9830001H06Rik	-0.146643	0.0986012	0.0587963	0.625042	-0.0878459	0.349759
9930012K11Rik	-0.441867	0.0261359	-0.235526	0.397432	-0.67735	0.00110186
9930013L23Rik	3.11854	4.90552e-156	-0.0649518	0.591741	3.0535	3.005e-143
9930021D14Rik	0.191713	0.381134	-0.0378073	0.918838	0.153895	0.502877
9930021J03Rik	0.0700008	0.557763	0.0104263	0.964729	0.0804258	0.516653
9930104L06Rik	0.00164812	1	-0.0712755	0.780807	-0.0696256	0.728812
A030009H04Rik	-0.622545	0.00622816	0.527143	0.0455228	-0.0953778	0.720615
A130010J15Rik	0.615516	0.00123366	0.230164	0.309503	0.845656	5.42968e-06
A130049A11Rik	-0.0881033	0.734514	0.629167	0.0014295	0.541046	0.00401691
A130077B15Rik	0.175205	0.0869317	-0.28252	0.0108057	-0.107315	0.338345
A230046K03Rik	0.263267	0.000683097	-0.119876	0.198159	0.143391	0.0804946
A230050P20Rik	-0.798419	4.65701e-05	-0.0214986	1	-0.81986	6.39853e-05
A230051G13Rik	0.336024	0.131207	0.0900169	0.780807	0.42601	0.0585806
A230072C01Rik	0.352324	0.106635	0.195486	0.435683	0.547775	0.00962371
A230073K19Rik	0.863932	3.54679e-08	-0.0360646	0.886434	0.827835	3.23315e-07
A2ld1	-0.733682	1.0738e-05	-0.402829	0.081864	-1.13646	2.04704e-10
A430005L14Rik	-0.493917	0.0099449	0.530064	0.0109646	0.0361515	0.875102
A430033K04Rik	0.521569	0.0127205	-0.0815562	0.817692	0.439977	0.0436807
A430105I19Rik	-0.415189	3.24479e-06	-0.582962	1.21588e-08	-0.998142	4.20832e-26
A430107O13Rik	-0.610914	0.000573932	0.14964	0.596763	-0.461248	0.0116193
A4galt	0.560698	0.00201651	0.430296	0.0246163	0.990974	1.64008e-08
A530054K11Rik	-0.159792	0.446876	-0.176585	0.495609	-0.336368	0.0923648
A630007B06Rik	0.50205	0.00513377	-0.172067	0.459062	0.329975	0.0775716
A630033H20Rik	-1.22619	1.71376e-12	0.580944	0.00641618	-0.645208	0.000170093
A630055G03Rik	-0.0305191	0.914246	-0.400056	0.103529	-0.430553	0.0522327
A630072M18Rik	0.0644623	0.932796	-0.280658	0.736761	-0.216183	0.76295
A630089N07Rik	0.223211	0.200554	-0.294083	0.126698	-0.0708725	0.737837
A730011L01Rik	0.0259482	0.84363	-0.378339	0.000502335	-0.352387	0.000743365
A730017L22Rik	-0.17793	0.342491	-0.441828	0.0289075	-0.619735	0.000710658
A730056A06Rik	5.19337	1.60235e-10	0.416759	0.589731	5.60533	1.01649e-11
A730085A09Rik	-0.0850185	0.902054	-1.01778	0.142948	-1.1027	0.0726803
A730098P11Rik	0.234089	0.00271103	0.00944242	0.947828	0.24353	0.00200551
A830007P12Rik	-1.25453	2.44698e-12	0.459365	0.0358883	-0.795144	8.99725e-06
A830010M20Rik	0.345228	0.14912	0.0860086	0.814934	0.4312	0.0734633
A830080D01Rik	-0.604697	0.000102587	-0.0971357	0.693211	-0.701808	1.43483e-05
A830082K12Rik	-0.448911	0.0307336	0.399659	0.100745	-0.0492385	0.850086
A930001C03Rik	-0.37459	0.0578079	0.877434	1.93119e-06	0.502836	0.00405598
A930001N09Rik	-0.448246	0.0165747	0.125286	0.640685	-0.32295	0.0933075
A930016O22Rik	6.47665	0	0.0501287	0.734311	6.52651	0
AA465934	-0.768472	6.96343e-05	0.386977	0.109869	-0.381463	0.0555968
AA960436	-0.069367	0.74423	0.00404997	0.998945	-0.0653157	0.76384
AA987161	-0.106046	0.608552	0.14415	0.547715	0.0381043	0.876141
Aaas	-1.14116	1.66675e-38	-0.342617	0.00337908	-1.48376	1.46192e-56
Aacs	0.535029	2.3629e-09	0.387654	1.30848e-05	0.922675	4.07683e-26
Aagab	0.424364	2.11954e-05	-0.419297	8.27751e-05	0.00506467	0.988677
Aak1	0.286897	0.000646788	-0.30666	0.000684142	-0.019763	0.857307
Aamp	0.136482	0.217352	-0.0169263	0.925523	0.119556	0.286042
Aars	0.0171622	0.889804	-0.0915965	0.486841	-0.0744342	0.502117
Aars2	0.00968521	0.98316	-0.0810921	0.765189	-0.0714059	0.732501
Aarsd1	-0.450644	9.19587e-06	-0.190996	0.154928	-0.64163	1.13534e-09
Aasdh	0.256744	0.192799	0.109632	0.67297	0.366358	0.0579501
Aasdhppt	-0.00143838	1	0.224469	0.0763462	0.223028	0.0526221
Aatf	-0.385615	0.000198093	0.225955	0.0654601	-0.159657	0.147797
AB335951	0.128309	0.526379	0.613484	0.000968912	0.741783	2.20003e-05
AB341359chr16+	0.0459931	0.871305	-0.0571807	0.87315	-0.0111881	1
AB341653	0.225839	0.223794	0.716013	7.48583e-06	0.941826	1.41572e-09
AB341725	-0.244478	0.00338906	-0.0489063	0.690817	-0.293383	0.00050714
AB343404	0.198189	0.296459	0.323514	0.106668	0.521696	0.00311617
AB345460	0.167332	0.409208	0.157881	0.516206	0.325207	0.087162
AB346228	0.66432	9.12846e-05	-0.0704007	0.769554	0.59389	0.000813533
AB346318	0.854863	2.15815e-16	-0.34528	0.00168107	0.509572	6.87216e-06
AB347871chr3+	-0.517988	0.00606875	-0.202593	0.434642	-0.720561	0.000165823
AB347889chr3+	-0.719782	4.77412e-05	-0.102934	0.723095	-0.822696	4.92721e-06
AB349340	0.853242	2.69466e-16	-0.403351	0.00022017	0.449879	8.24388e-05
AB349943	-0.0877556	0.684314	-0.0415043	0.886822	-0.129254	0.533149
AB351190	0.222387	0.239455	-0.16102	0.502536	0.0613638	0.784461
AB351656	0.177803	0.397963	0.628253	0.0011469	0.80604	9.33435e-06
AB352356	0.494114	0.00766197	0.22904	0.273883	0.723121	5.80115e-05
Abca2	0.262455	0.0208414	0.870607	3.51285e-19	1.13305	3.02243e-30
Abca3	-0.301451	0.060477	0.236556	0.220505	-0.0648897	0.727444
Abca5	0.82498	8.19306e-20	-0.246649	0.0125433	0.578324	1.34276e-09
Abca7	0.413251	2.96054e-06	-0.0356163	0.793696	0.377631	3.18638e-05
Abca8b	1.18132	1.09483e-10	-0.079598	0.759485	1.10169	3.61662e-09
Abcb10	0.393069	0.000172342	-0.0686506	0.632518	0.324413	0.00299172
Abcb1b	-1.44161	9.28069e-15	0.599874	0.00761014	-0.841699	4.79838e-06
Abcb6	0.841272	3.84229e-22	0.122674	0.231653	0.963938	2.66851e-28
Abcb7	0.586664	1.00105e-08	0.0546763	0.705091	0.641331	7.26779e-10
Abcb8	0.0812925	0.496273	-0.248584	0.042062	-0.16729	0.14843
Abcc1	-0.93575	7.42281e-36	-0.132542	0.195885	-1.06829	3.72953e-44
Abcc10	-0.0605532	0.813401	-0.269432	0.268004	-0.32997	0.121465
Abcc4	-2.1619	3.01967e-30	0.588957	0.016153	-1.57288	1.20324e-17
Abcc5	-0.177955	0.0342527	0.0305078	0.813835	-0.147446	0.0874863
Abcc9	2.1759	2.87359e-20	0.340101	0.096286	2.51572	9.56588e-28
Abcd1	0.961512	4.62027e-08	-0.148983	0.522497	0.812508	5.95566e-06
Abcd3	0.112376	0.260858	0.0901112	0.454303	0.202485	0.0355642
Abcd4	0.155408	0.186183	0.116981	0.401626	0.272385	0.0152765
Abce1	0.0905235	0.423345	-0.0493831	0.742481	0.0411402	0.731424
Abcf1	0.121909	0.273151	-0.0672286	0.641657	0.0546797	0.646893
Abcf2	0.0838144	0.306606	-0.105194	0.262785	-0.02138	0.818047
Abcf3	0.174925	0.0672738	0.139209	0.201258	0.314132	0.000687591
Abcg2	0.196374	0.0358776	-0.25236	0.0129762	-0.0559867	0.608408
Abhd1	1.57529	9.36846e-50	-0.209993	0.0562576	1.36527	1.41342e-34
Abhd10	-0.327181	0.0652521	-0.705825	0.000648575	-1.03296	3.01332e-08
Abhd11	-0.200516	0.322786	0.286718	0.202154	0.0862028	0.701733
Abhd12	-0.519821	1.29183e-08	0.126064	0.303222	-0.393752	2.63426e-05
Abhd13	0.450609	1.202e-06	-0.27611	0.00681515	0.174496	0.0915819
Abhd14a	0.400416	0.032533	-0.0296592	0.95086	0.370737	0.0553011
Abhd14b	-0.121736	0.643853	0.128472	0.70521	0.00673894	1
Abhd16a	0.0475692	0.693458	0.175156	0.153493	0.222723	0.0390487
Abhd2	-0.156051	0.121224	-0.206763	0.0750953	-0.36281	0.000284446
Abhd4	-0.340753	1.88824e-05	-0.127683	0.208438	-0.468434	6.04221e-09
Abhd5	-0.504911	1.02119e-06	0.493547	6.57904e-06	-0.0113608	0.941007
Abhd6	-0.335776	0.0542119	0.159533	0.495731	-0.176233	0.338898
Abhd8	0.93239	6.3734e-28	-0.0992116	0.353749	0.83317	4.49082e-21
Abi1	-0.285121	0.000498987	0.143194	0.147245	-0.141925	0.0993666
Abi2	-0.257637	0.00777423	0.377492	0.000150676	0.119855	0.233319
Abi3	0.163509	0.0880917	0.708504	4.63011e-17	0.872008	3.22598e-25
Abl1	-0.567639	1.31313e-14	-0.188546	0.0365696	-0.756182	6.15551e-24
Abl2	0.736782	1.10864e-22	-0.681299	1.15966e-18	0.0554816	0.55315
Ablim1	1.72833	2.5086e-93	-0.511966	2.21314e-10	1.21635	1.32255e-42
Ablim3	5.436	5.32516270144246e-316	0.491003	4.88187e-10	5.92666	0
Abr	0.770467	8.76253e-15	-0.265025	0.0186175	0.505441	6.20219e-07
Abra	2.35811	5.97303e-44	2.12466	1.7966e-107	4.48258	4.79653e-249
Abt1	-0.132955	0.507708	-0.199882	0.392819	-0.33283	0.0785387
Abtb1	-0.0275161	0.91987	0.376851	0.0313688	0.349327	0.0326124
Abtb2	1.6159	2.12944e-43	0.0760222	0.582568	1.69188	4.29259e-46
Acaa1a	-0.750159	2.2792e-14	0.0177526	0.936363	-0.732395	4.18807e-13
Acaa1b	-0.591795	0.0012966	-0.0341212	0.958362	-0.625881	0.00118733
Acaa2	0.0892733	0.327838	0.633609	1.24976e-15	0.722879	2.36242e-20
Acaca	0.922865	9.88179e-34	0.106293	0.25266	1.02915	2.86843e-41
Acad10	1.17304	7.91699e-10	-0.558373	0.005234	0.614604	0.00454087
Acad11	-0.0228992	0.91798	-0.0414683	0.898114	-0.0643661	0.774133
Acad12	0.530656	0.390185	0.410313	0.6009	0.940885	0.118548
Acad8	-0.290805	0.122811	0.0262947	0.947548	-0.264504	0.171551
Acad9	0.169974	0.0991614	-0.187724	0.108956	-0.0177506	0.899055
Acadl	0.638943	5.08241e-17	0.448766	2.93391e-09	1.0877	1.25017e-48
Acadm	0.250044	0.0053805	0.395548	6.57904e-06	0.645589	2.06172e-14
Acads	0.436638	3.07347e-06	0.366456	8.17866e-05	0.803087	5.44946e-19
Acadsb	0.93854	2.87161e-30	-0.567645	1.68085e-11	0.370891	4.46127e-05
Acadvl	0.424995	1.31398e-08	-0.0339933	0.761992	0.390999	2.66274e-07
Acap2	-0.306562	0.000288355	0.0933967	0.405324	-0.213164	0.0146757
Acap3	-0.408286	2.77338e-05	0.204917	0.0828766	-0.203366	0.0462748
Acat1	1.54309	6.98941e-86	-0.50643	1.14697e-10	1.03665	1.42344e-35
Acat2	1.43461	1.61505e-59	-0.0282822	0.826744	1.40632	2.62982e-55
Acat3	0.482702	1.26781e-08	0.0192576	0.891678	0.501956	5.28161e-09
Acbd3	0.102845	0.247574	-0.156672	0.109562	-0.0538265	0.578756
Acbd4	0.026683	0.844046	0.0870667	0.536914	0.113748	0.331183
Acbd5	-0.0183035	0.881534	0.243301	0.0168409	0.224996	0.017536
Acbd6	-0.488419	3.11035e-07	0.233163	0.0422872	-0.255251	0.0099477
Accn1/B830045N13Rik	-0.764489	7.16355e-05	0.421282	0.0791037	-0.343177	0.0811377
Accn2	-1.00949	8.01854e-08	-0.118069	0.726641	-1.12748	1.17937e-08
Acd	-0.435729	0.0151491	-0.299382	0.173029	-0.735096	4.35788e-05
Acer3	-0.776952	7.74777e-05	0.649311	0.00317255	-0.127618	0.576863
Acin1	0.278899	0.00796266	-0.300134	0.00822412	-0.0212351	0.867658
Acly	0.594356	3.52399e-09	-0.0815089	0.553933	0.512846	4.51975e-07
Acn9	0.277706	0.680692	0.290417	0.725786	0.568078	0.357256
Aco1	0.320763	0.000756284	0.244671	0.0148957	0.565429	9.90886e-10
Aco2	0.910657	2.44584e-21	0.325377	0.00209551	1.23603	4.90638e-38
Acot11	0.254958	0.346648	0.635071	0.00402707	0.889971	3.91578e-05
Acot13	0.306248	0.100035	0.136372	0.570279	0.44261	0.0152713
Acot2	-1.06166	8.96958e-10	0.619506	0.00148392	-0.442143	0.0123469
Acot7	-1.18764	2.59748e-49	-0.0627389	0.643218	-1.25037	5.28404e-50
Acot8	0.0350067	0.888921	-0.115775	0.642887	-0.0807661	0.720615
Acot9	0.395718	1.51717e-06	-0.0685929	0.537105	0.327123	0.00011519
Acox1	0.53178	1.61519e-12	-0.197511	0.0202976	0.334267	2.09987e-05
Acox3	-0.307049	0.00475277	0.11469	0.439091	-0.192355	0.0951948
Acp1	0.0342163	0.748235	-0.0154259	0.924213	0.0187902	0.868983
Acp2	-0.110778	0.270016	0.0478946	0.732313	-0.0628826	0.559473
Acp6	0.933673	6.19124e-08	-0.339847	0.0858093	0.593811	0.00104145
Acpl2	-0.327545	0.0937216	-0.153191	0.615512	-0.48071	0.0171146
Acrbp	-0.102229	0.635821	0.0174961	0.966663	-0.0847308	0.702975
Acsbg1	-3.88059	2.01824e-220	1.06658	2.2421e-08	-2.81392	4.75528e-143
Acsf2	0.153132	0.457817	-0.0632745	0.842423	0.0898544	0.680929
Acsf3	-0.195489	0.313337	0.0302117	0.946477	-0.165268	0.428307
Acsl1	2.15633	4.26376e-46	1.33287	1.53178e-41	3.48907	7.97302e-156
Acsl3	2.67255	5.50937e-150	0.27234	0.0129891	2.94488	4.67328e-180
Acsl4	1.37348	1.88919e-43	0.123542	0.329018	1.49701	4.08658e-51
Acsl5	-1.13853	3.19922e-35	0.0886496	0.547467	-1.04987	5.323e-29
Acsl6	3.14302	4.10394e-102	0.636006	3.81425e-11	3.77886	2.75399e-164
Acss2	2.65189	2.89865e-40	0.368429	0.053472	3.02019	1.87879e-52
Acta1	3.83348	1.88277e-301	-0.312107	0.00296735	3.52137	1.62247e-261
Acta2	2.31582	6.62961e-126	-1.47702	1.2251e-53	0.838803	1.26677e-18
Actb	-0.262041	0.00802774	-0.37441	0.00028708	-0.636451	2.25973e-11
Actc1	5.24884	0	-1.34578	5.63304e-45	3.90305	7.70962e-307
Actg1	-0.233261	0.0191822	-0.596683	1.6335e-09	-0.829943	1.88993e-18
Actg2	-0.120989	0.154204	-1.31989	1.39694e-50	-1.44087	3.48366e-61
Actl6a	0.0227615	0.84405	-0.135501	0.232393	-0.112739	0.265428
Actn1	-0.304802	0.00247202	-0.572165	2.9463e-08	-0.876966	3.26747e-19
Actn2	4.32065	2.1308e-227	1.53349	3.95245e-54	5.85405	0
Actn3	3.06565	2.33982e-193	-0.0774773	0.56388	2.98817	3.3236e-184
Actn4	-0.408743	3.19101e-05	-0.714585	1.05892e-12	-1.12333	3.03662e-31
Actr10	0.0943329	0.292595	-0.0973126	0.359366	-0.00297981	0.987046
Actr1a	-0.269668	0.0112405	0.0370849	0.819432	-0.232582	0.030658
Actr1b	0.150114	0.0648925	0.0256917	0.833973	0.175805	0.0304084
Actr2	-0.624753	1.49476e-10	-0.160408	0.184249	-0.785159	7.31789e-16
Actr3	-0.211472	0.041299	-0.17595	0.140994	-0.387422	0.000117845
Actr5	-0.107362	0.624666	0.121066	0.664247	0.0137054	1
Actr6	-0.355918	0.0311474	0.229672	0.261013	-0.126238	0.495972
Actr8	0.461019	2.41264e-05	0.141839	0.268899	0.602848	2.59752e-08
Acvr1	-0.231357	0.00973473	0.0849506	0.47557	-0.146405	0.117451
Acvr1b	0.14494	0.433045	-0.0673165	0.809802	0.0776197	0.733386
Acvr2a	0.804447	1.07735e-16	0.139127	0.21539	0.943561	3.9353e-22
Acy1	0.0207925	0.94962	-0.105681	0.72726	-0.0848854	0.733514
Acyp1	-0.246993	0.163199	0.025395	0.952292	-0.221588	0.218311
Acyp2	0.901211	4.57812e-05	-0.144714	0.609739	0.756419	0.00126075
Adal	-0.00762232	1	-0.210134	0.388766	-0.217748	0.288097
Adam10	-0.348843	3.6805e-06	0.0424235	0.706787	-0.306418	6.3872e-05
Adam12	3.03172	1.08796e-201	-0.805071	5.08617e-23	2.2266	9.69433e-94
Adam15	-0.251713	0.00459451	-0.0150287	0.928063	-0.26674	0.00320978
Adam17	0.0599785	0.521477	-0.102451	0.33341	-0.0424728	0.666908
Adam19	2.40773	8.82204e-120	-0.418234	9.0406e-05	1.98949	1.82126e-81
Adam9	-0.238974	0.023359	-0.029655	0.85682	-0.268629	0.010484
Adamts1	2.42275	9.54992e-116	-0.364452	9.80372e-05	2.05825	8.27806e-76
Adamts10	0.120508	0.490131	-0.702059	5.31845e-05	-0.581536	0.000605473
Adamts12	1.77224	2.10847e-19	-0.056897	0.833189	1.71521	3.55269e-17
Adamts14	0.862621	1.10864e-22	0.354625	4.48176e-05	1.21724	7.43286e-45
Adamts16	3.90925	3.08719e-32	0.866197	1.33765e-06	4.77413	1.10262e-58
Adamts2	0.75623	4.75938e-16	0.827087	8.64174e-24	1.5833	6.93182e-73
Adamts4	1.96306	2.43771e-110	-0.617077	3.28474e-14	1.34597	7.19498e-47
Adamts5	3.99123	1.58384e-293	-0.279597	0.000834919	3.71154	1.36155e-238
Adamts6	0.00781231	0.984057	-0.325668	0.117572	-0.317851	0.0893989
Adamts7	1.61422	7.21025e-68	-0.493727	2.80984e-08	1.12048	1.31784e-29
Adamtsl1	0.842894	0.000452187	1.41285	6.71757e-16	2.2556	6.71354e-31
Adamtsl2	4.63453	1.73824e-84	-0.671662	1.40162e-05	3.96211	5.2869e-51
Adamtsl3	-2.49894	1.63563e-109	1.6604	3.12791e-39	-0.838513	2.60663e-18
Adamtsl4	-1.25553	1.33207e-15	0.666164	0.000335764	-0.589342	0.000133908
Adamtsl5	-0.330728	0.000206087	0.181349	0.0867479	-0.149377	0.113083
Adar	-0.284253	0.00767731	-0.344342	0.00542804	-0.628586	8.52155e-09
Adarb1	0.481179	0.0141056	0.131586	0.607011	0.612746	0.00138659
Adat1	-0.733712	0.00013914	-0.122306	0.709396	-0.855963	2.1051e-05
Adat2	-0.301875	0.14254	-0.188974	0.509457	-0.49082	0.0167366
Adat3	-0.332302	0.119071	-0.0490013	0.927087	-0.381276	0.0857434
Adc	-0.7566	3.29724e-05	0.192937	0.439552	-0.563647	0.00240376
Adck1	0.232114	0.214125	0.1163	0.624307	0.348408	0.0553215
Adck2	0.00977285	1	0.16532	0.510063	0.175087	0.405051
Adck3	2.29789	6.4667e-69	2.04403	5.69818e-133	4.34182	0
Adck4	0.824166	9.65514e-06	-0.0759484	0.788681	0.748193	9.02433e-05
Adck5	-0.611626	0.00038552	0.0552616	0.847816	-0.556354	0.00144448
Adcy3	-1.21179	3.69022e-11	-0.0239486	0.975923	-1.2357	3.74263e-11
Adcy6	-0.642954	9.56484e-19	0.0378191	0.743823	-0.605133	2.22863e-16
Adcy7	0.771656	4.3314e-15	-0.28707	0.00927682	0.484585	1.39911e-06
Adcy9	0.829694	1.95203e-06	0.563069	0.000494492	1.39271	2.34747e-17
Add1	-0.149451	0.170376	0.105883	0.428038	-0.0435681	0.71631
Add3	0.294768	0.098481	0.510411	0.00225044	0.805154	5.1858e-07
Adh5	-0.48143	4.81989e-10	-0.096426	0.362215	-0.577853	1.96923e-13
Adh7	-0.579181	1.13855e-08	-0.0378254	0.833704	-0.616997	3.61106e-09
Adi1	-0.0416775	0.845455	0.178357	0.387017	0.136677	0.446201
Adipor1	-0.106892	0.342674	-0.0056715	0.982036	-0.112563	0.316454
Adipor2	0.697674	7.52629e-19	-0.0256607	0.836058	0.672009	4.47245e-17
Adk	-0.135193	0.20122	-0.376522	0.000895112	-0.511709	8.77391e-07
Adm2	0.273147	0.103113	-0.36685	0.0544578	-0.0937042	0.660177
Adnp	0.235679	0.0268703	-0.0584731	0.692516	0.177205	0.103453
Adnp2	-0.0902525	0.361694	-0.343136	0.000639358	-0.433385	3.83068e-06
Ado	-0.620608	3.87165e-14	0.248162	0.0103312	-0.372443	8.91558e-06
Adora1	4.23428	7.49526e-291	-0.210175	0.065606	4.02408	1.68991e-263
Adora2b	1.22058	6.81083e-11	-0.758542	8.03567e-05	0.461986	0.0405577
Adpgk	-0.746048	1.31586e-14	0.116997	0.403771	-0.629041	1.98996e-10
Adprh	0.931343	4.65556e-36	-0.110501	0.224784	0.820838	2.49226e-27
Adprhl2	-0.744074	1.7194e-05	0.0463985	0.875768	-0.69766	7.09046e-05
Adra1b	-1.29961	2.85364e-13	-0.541866	0.0524405	-1.84136	1.16317e-20
Adrb2	1.42004	8.42099e-16	0.604787	7.71955e-05	2.02473	8.64541e-34
Adrbk1	0.00283135	0.988174	-0.148561	0.137386	-0.145729	0.102475
Adrm1	0.0865625	0.294637	0.161665	0.0620218	0.248227	0.00123624
Adsl	0.0575271	0.528851	0.00420114	0.985669	0.0617278	0.500679
Adss	-0.831088	5.86265e-26	-0.214882	0.0345916	-1.04596	7.48705e-38
Adssl1	1.97973	2.86591e-105	1.04846	7.45851e-47	3.02816	6.21576e-265
Aebp1	-0.505167	3.39128e-07	-0.107189	0.41239	-0.612355	5.63024e-10
Aebp2	-0.694809	2.3492e-21	0.104754	0.286783	-0.590053	1.84799e-15
Aen	-0.410732	3.40055e-07	0.167652	0.0843738	-0.243079	0.00348082
Aes	0.259124	0.0124494	0.309524	0.00479615	0.568647	1.10094e-08
Afap1	0.0622042	0.510387	-0.386687	1.79903e-05	-0.324481	0.000211622
Afap1l1	4.09167	1.17607e-137	0.499013	3.02044e-07	4.59036	1.60351e-189
Afap1l2	1.61145	4.36208e-20	0.539729	0.000405595	2.15108	2.73126e-37
Aff1	0.0835935	0.333762	-0.204669	0.0223913	-0.121075	0.16002
Aff4	0.290697	0.00449888	-0.303425	0.0059842	-0.0127286	0.921879
Afg3l1	-0.247276	0.00341876	-0.0247734	0.860023	-0.272047	0.00151242
Afg3l2	0.632819	6.54179e-17	0.267989	0.000814262	0.900804	2.04802e-33
Afmid	0.307885	0.108906	-0.0275641	0.939419	0.280312	0.155113
Aftph	-0.158458	0.0915138	-0.132657	0.24647	-0.291113	0.00179365
Aga	-0.215082	0.0401992	-0.082561	0.571433	-0.297639	0.00495309
Agap1	1.05505	5.98341e-45	-0.48605	2.91061e-10	0.568994	8.43979e-13
Agap2	-0.192446	0.399133	-0.366655	0.171182	-0.559065	0.0138063
Agap3	0.0319083	0.743662	0.167828	0.0701098	0.199735	0.0161717
Agbl3	0.182285	0.464341	0.054613	0.876203	0.23688	0.328819
Agbl5	-0.288496	0.146706	0.216132	0.386237	-0.0723589	0.750018
Agfg1	-0.34068	6.4331e-05	0.145649	0.165167	-0.195029	0.0279309
Agfg2	0.0712078	0.762119	0.555031	0.00590192	0.626226	0.000936148
Aggf1	0.0464318	0.663926	0.362388	8.95284e-05	0.408817	3.64493e-06
Agk	-0.0778317	0.7316	-0.0254649	0.949649	-0.103294	0.645486
Agl	1.89298	5.76637e-76	-0.0451697	0.76533	1.8478	6.15357e-72
Agpat1	-0.202553	0.0142607	-0.169828	0.0785401	-0.372379	5.89087e-06
Agpat2	-1.43532	6.18961e-17	0.80258	7.67925e-05	-0.632702	0.000134591
Agpat3	0.870482	6.03737e-31	0.220243	0.00669106	1.09072	3.98645e-48
Agpat4	0.460496	0.00978864	-0.0398272	0.885593	0.42066	0.0195538
Agpat5	0.623257	7.25062e-11	-0.0130226	0.943364	0.610227	4.56296e-10
Agpat6	-0.120151	0.142361	0.124065	0.185846	0.00391368	0.975748
Agpat9	0.0963741	0.891815	-0.312569	0.697493	-0.216183	0.76295
Agps	0.137607	0.104266	-0.0642695	0.560425	0.073337	0.419851
Agrn	-0.219636	0.0126885	0.107397	0.335247	-0.112238	0.230144
Agtpbp1	0.341845	0.00212759	-0.0162384	0.929631	0.3256	0.00456632
Agtrap	-0.371305	0.0470909	0.170052	0.489547	-0.201246	0.299728
Agxt2l2	-0.170728	0.033687	-0.146119	0.120371	-0.316846	6.55301e-05
Ahctf1	-0.0420405	0.659803	-0.191416	0.0437045	-0.233455	0.00619867
Ahcy	-0.513644	4.51437e-12	-0.0285934	0.816488	-0.542236	5.88331e-13
Ahcyl1	-0.565249	1.86126e-08	0.065716	0.651799	-0.499531	8.05987e-07
Ahcyl2	0.0312185	0.795033	0.0721808	0.606208	0.103398	0.363016
Ahdc1	0.731491	2.88066e-20	0.0688952	0.512831	0.800381	1.17e-23
Ahi1	0.0274319	0.908387	-0.0759396	0.752163	-0.0485069	0.817126
Ahnak	-0.667221	2.46105e-12	0.498073	7.28368e-07	-0.169148	0.0954516
Ahnak2	-0.516337	2.4406e-08	0.454807	4.94511e-06	-0.061528	0.560815
Ahr	1.18951	6.78024e-29	-0.773921	3.56188e-13	0.415573	0.000899984
Ahsa1	-0.109469	0.181805	-0.117084	0.221494	-0.226552	0.00441508
Ahsa2	0.297189	6.83214e-05	-0.350474	8.14003e-06	-0.0532857	0.539862
AI314180	0.395408	1.95813e-07	0.0308857	0.790246	0.426292	2.47848e-08
AI314976	-0.460209	0.00462842	-0.0910276	0.728429	-0.551216	0.000945515
AI316807	-0.262381	0.179512	0.355654	0.0935706	0.0932742	0.66665
AI413582	-1.19953	1.12136e-12	0.601129	0.00356531	-0.598364	0.000347178
AI429214	0.0474057	0.971982	0.307557	0.708191	0.354939	0.581791
AI462493	-0.409204	0.02071	0.375042	0.0595131	-0.0341542	0.887303
AI464131	3.24289	1.80163e-220	0.0526463	0.630092	3.29547	5.86484e-224
AI467606	0.169363	0.118016	-0.0640876	0.661755	0.105274	0.368836
AI480653	-0.460137	1.30901e-05	0.146917	0.2935	-0.313214	0.00418967
AI506816	-0.387899	0.000182969	-0.0656779	0.658841	-0.453575	1.2141e-05
AI597468	0.464543	2.59337e-08	0.206675	0.0233185	0.671214	3.40478e-16
AI597479	0.397113	3.57314e-05	-0.06228	0.641657	0.334828	0.000787612
AI646023	-0.646687	0.000251879	-0.105433	0.73138	-0.752082	3.98348e-05
AI662270	-0.185125	0.32153	-0.247586	0.285431	-0.432694	0.0191017
AI837181	-0.66704	1.82204e-13	0.223978	0.0441598	-0.443057	1.49685e-06
AI846148	-0.0583458	0.788428	-0.12133	0.624864	-0.179673	0.357187
AI987944	0.564031	0.000526686	-0.116016	0.588341	0.447995	0.00876188
Aida	-0.468795	5.58609e-09	0.0122456	0.93901	-0.456547	2.49706e-08
Aif1l	2.42787	3.23545e-121	-0.957099	4.20719e-21	1.47076	6.86042e-44
Aifm1	0.363133	4.2935e-05	-0.0541285	0.667254	0.309001	0.000756916
Aifm2	-0.0689555	0.751945	0.0694429	0.800238	0.000487891	1
Aig1	-0.569771	0.00251866	0.504238	0.0153959	-0.0655264	0.772741
Aim1	-2.07285	4.2209e-32	-0.463703	0.0650568	-2.53648	3.7186e-42
Aim2	-0.674416	0.000671807	0.179699	0.565023	-0.494679	0.0161485
Aimp1	-0.0973402	0.274731	0.148727	0.127277	0.0513863	0.587216
Aimp2	0.299191	0.000917763	-0.30317	0.00189603	-0.00397931	0.985174
Aip	-0.192956	0.0260002	0.114972	0.279779	-0.0779835	0.405823
AK003208	-0.33311	0.000184129	0.56859	1.38946e-10	0.23548	0.00760352
AK003349	1.52885	3.90009e-18	0.106857	0.606974	1.63562	3.72127e-20
AK005187	0.561544	0.000543532	-0.576611	0.000901465	-0.0150739	0.978262
AK006119	-0.00556362	0.970718	0.172651	0.0871349	0.167087	0.0675762
AK006397	-0.65565	0.000899649	-0.615793	0.0235185	-1.27135	3.52477e-09
AK007223	0.0902644	0.908387	-0.424423	0.599567	-0.334136	0.607182
AK007459	-0.460371	0.0085775	0.329714	0.113357	-0.130646	0.490978
AK008044	-0.0561263	0.800775	0.625452	0.000172626	0.569313	0.000402185
AK008288	0.241265	0.212514	-0.155096	0.527033	0.0861651	0.699281
AK008866	-0.541962	6.9658e-08	0.223617	0.0674929	-0.318339	0.00200763
AK009395	0.018093	0.957338	-0.408293	0.0493883	-0.390186	0.0427115
AK009785	3.30206	2.41362e-07	-0.377581	0.622718	2.9237	5.28911e-06
AK010638	-0.728	8.89195e-05	-0.187761	0.510628	-0.915707	2.60943e-06
AK010878	0.0345111	0.919872	0.0715166	0.807616	0.106023	0.621835
AK011205	-0.597401	5.94768e-14	-0.247057	0.0111809	-0.844453	5.21652e-25
AK011326	-0.174312	0.450537	-0.380853	0.154525	-0.55513	0.0128877
AK012214	-0.112244	0.687955	0.133937	0.684258	0.0216943	0.968924
AK012891	0.845091	5.14289e-18	-0.436993	1.91209e-05	0.408089	0.000155858
AK013192	0.130866	0.264563	0.166769	0.191143	0.297631	0.00716287
AK013480	-0.0611412	0.93912	0.297158	0.723354	0.236004	0.724891
AK013883	0.280947	0.158243	-0.0742154	0.804186	0.206724	0.324002
AK015392	0.157877	0.533858	0.394483	0.103529	0.552326	0.0108717
AK015544	-0.76137	1.08377e-05	0.269111	0.24528	-0.492231	0.00514354
AK015714	0.142438	0.507818	0.460932	0.0134896	0.603349	0.00062904
AK016162	0.119828	0.576256	-0.351701	0.123015	-0.231866	0.296635
AK017092	0.476466	9.13522e-07	0.330345	0.000737108	0.806802	1.14612e-17
AK017368	7.14232	0	-2.45522	1.7978e-122	4.68576	3.7451e-62
AK017645	-0.665125	0.000126032	0.082405	0.804169	-0.582691	0.00102698
AK017680	-0.874372	6.51102e-07	0.0324334	0.927287	-0.841919	2.25789e-06
AK017779	-0.11115	0.295474	0.184034	0.10948	0.0728833	0.510731
AK018074	0.659086	0.000328771	-0.322516	0.133558	0.336544	0.10845
AK018214	0.134218	0.545966	-0.166292	0.558451	-0.0320752	0.937863
AK018523	0.73491	9.95002e-05	-0.44998	0.0292438	0.284902	0.204081
AK018584	0.10277	0.567962	-0.404748	0.0281793	-0.30197	0.0882772
AK018679	-0.955194	9.3665e-25	0.472156	9.23194e-06	-0.483031	1.93014e-07
AK019237	-0.601505	0.310911	0.102659	0.928678	-0.498807	0.415258
AK019420	0.473779	3.18574e-09	0.0167616	0.901644	0.490538	1.35594e-09
AK020087	0.85556	8.83774e-07	-0.254035	0.225526	0.601509	0.000893205
AK020205	1.52121	2.32292e-14	0.664855	0.000365783	2.18598	1.59454e-29
AK020398	-0.482991	0.00509054	-0.0196885	0.966208	-0.502657	0.00462177
AK020406	0.827531	0.000127652	0.284449	0.215497	1.1119	1.46497e-07
AK020898	0.143385	0.533316	-0.316386	0.193228	-0.172995	0.474337
AK028111	8.3378	7.1313e-86	-0.673678	7.27797e-05	7.65051	2.87677e-56
AK028224	0.741302	7.77419e-05	-0.430736	0.0348099	0.310537	0.160992
AK028549	-2.16509	1.53093e-43	-0.158865	0.613807	-2.32386	1.09965e-44
AK029061	0.123997	0.550784	-0.13251	0.616843	-0.00851357	0.988276
AK029663	1.73788	4.38057e-14	-0.338746	0.16245	1.39895	2.724e-08
AK030308	0.939796	4.14909e-06	0.12762	0.632266	1.06734	1.46898e-07
AK031097	0.989554	9.04507e-20	0.373602	0.00029484	1.36313	1.17747e-37
AK031165	0.111291	0.886162	-0.41835	0.596649	-0.30704	0.651292
AK031561	-0.932395	9.79648e-08	0.210174	0.415697	-0.722181	5.50543e-05
AK031819	0.0263163	0.921505	-0.129049	0.596649	-0.102731	0.619321
AK031925	0.0260633	0.791735	-0.229413	0.0114126	-0.203349	0.0166178
AK032382	1.09964	2.55345e-10	0.137055	0.523819	1.23663	1.13906e-12
AK032919	0.334164	0.13668	-0.256317	0.330569	0.0778338	0.779505
AK033381	0.371968	0.0188955	-0.323174	0.0724041	0.0487895	0.807861
AK033854	1.22264	8.85342e-08	-0.155431	0.581982	1.06708	8.46678e-06
AK033912	0.0360371	0.7822	0.0517149	0.739881	0.0877509	0.461154
AK034221	0.225608	0.0209617	0.210909	0.0441576	0.436513	3.67375e-06
AK034234	0.0394002	0.883101	0.449348	0.0295746	0.488739	0.0100658
AK034420	-0.559034	0.0035795	0.282493	0.257558	-0.276518	0.171212
AK034502	-0.392949	0.0274911	0.119683	0.633362	-0.27326	0.135661
AK034716	0.0138485	0.964235	-0.223447	0.350249	-0.209594	0.316538
AK035037	-0.140302	0.205297	-0.112122	0.428489	-0.252421	0.0217245
AK035085	1.75697	6.37172e-98	-0.676917	1.34873e-17	1.08004	1.14413e-33
AK035687	0.125416	0.486238	0.142371	0.492641	0.267779	0.109023
AK036614	-0.0629119	0.846212	0.162306	0.583999	0.0993906	0.67709
AK036974	-0.61711	0.00319825	0.412855	0.0962324	-0.20423	0.359277
AK037070	-0.00406538	1	0.104512	0.764426	0.100442	0.724273
AK038627	0.470784	0.00743738	-0.278162	0.177691	0.192617	0.315554
AK038784	-0.140241	0.446737	-0.204246	0.352364	-0.344475	0.0568517
AK038969	-0.453219	0.4841	0.555164	0.460035	0.101954	0.882714
AK039023	-0.720211	4.5416e-05	0.167903	0.500274	-0.552295	0.00213903
AK039091	0.160232	0.826205	0.15561	0.865529	0.315818	0.632008
AK039110	-0.37842	3.63861e-05	0.131564	0.267006	-0.246853	0.00931688
AK039132	0.972596	0.104396	0.0298957	0.988019	1.00238	0.0950201
AK039159	-0.445753	0.013152	-0.0697295	0.811019	-0.515471	0.00448986
AK039536	0.387913	0.0763676	-0.546525	0.0227861	-0.158612	0.572048
AK039624	0.925598	5.52909e-06	-0.46419	0.0390173	0.461357	0.0526781
AK040027	1.93803	0.00152633	0.663101	0.345521	2.60074	1.63702e-05
AK040197	-0.431739	0.0195416	0.144631	0.567811	-0.287101	0.129047
AK040485	1.41482	2.19593e-15	-0.134877	0.566536	1.27991	2.2916e-12
AK040602	-0.514626	0.000932068	0.0741595	0.780807	-0.440451	0.00589047
AK040741	0.734418	0.236838	0.0272902	0.99721	0.761617	0.222234
AK040752	-0.498959	0.0157912	-0.280658	0.37133	-0.779561	0.000363549
AK041287	-0.0754675	0.729172	-0.231294	0.311222	-0.306756	0.111371
AK041539	-0.183582	0.422703	0.227039	0.399155	0.0434593	0.875397
AK041758	-0.401874	0.069749	-0.195193	0.552907	-0.597022	0.00772052
AK041781	0.173892	0.809727	-0.168894	0.861765	0.0049921	1
AK042619	0.17525	0.447414	-0.381071	0.118434	-0.205814	0.403408
AK043046	-0.0586959	0.783929	0.0281673	0.928166	-0.0305278	0.896768
AK043531	-0.283128	0.0898882	-0.262164	0.206286	-0.545274	0.0011959
AK043693	0.294616	0.170281	0.0423959	0.893713	0.33699	0.123978
AK044378	1.88626	0.00149841	-0.154083	0.866969	1.73189	0.00439018
AK044480	-0.500489	0.00949494	0.163889	0.560529	-0.336577	0.0924842
AK044623	-0.255998	0.219043	0.061878	0.85871	-0.194107	0.380882
AK045290	-0.807502	5.33235e-05	-0.664323	0.0202058	-1.47171	3.13404e-11
AK045416	0.147237	0.447758	-0.0894566	0.730075	0.0577789	0.799457
AK046128	0.338778	0.112797	-0.342746	0.167944	-0.00397577	1
AK046225	-0.0286171	0.906642	-0.0623383	0.814032	-0.0909529	0.646125
AK046278	0.661659	6.20205e-13	0.10306	0.363661	0.76471	1.34793e-16
AK046304	1.15198	6.11159e-12	0.253469	0.151121	1.40539	2.10349e-17
AK046349	-0.455952	0.0378542	0.445607	0.0695573	-0.0103314	1
AK046369	0.773131	3.56845e-05	0.696541	0.000136695	1.46964	1.66066e-16
AK046417	-0.175519	0.379352	0.115926	0.655869	-0.0595903	0.797337
AK046873	0.679605	0.000141357	0.277173	0.176206	0.956759	4.35814e-08
AK047272	0.0952594	0.604038	-0.627629	0.000263543	-0.532357	0.00141156
AK047558	0.0755167	0.467003	-0.158669	0.15767	-0.083152	0.439098
AK047617	-0.467963	0.005971	0.755296	7.39816e-06	0.287333	0.0834515
AK047741	-0.418519	0.0201284	-0.0211888	0.951092	-0.439699	0.0151529
AK048019	4.05051	2.31535e-46	0.166156	0.452648	4.21571	1.86926e-50
AK048446	-0.743482	3.47863e-05	0.245773	0.334684	-0.497678	0.00752227
AK048571	0.145771	0.486779	-0.0684	0.819913	0.0773683	0.72863
AK048595	0.273125	0.191234	-0.469365	0.042513	-0.196236	0.403408
AK048798	0.639373	0.00108509	0.133733	0.603288	0.77308	6.73115e-05
AK048941	1.08119	7.62405e-12	-0.625545	0.000135486	0.455613	0.0131594
AK049600	-0.398704	1.7402e-05	0.000846531	1	-0.397853	3.0593e-05
AK050117	-0.362252	0.072185	0.993356	7.96417e-08	0.631091	0.000368073
AK050838	0.29026	0.228102	0.327643	0.176999	0.617863	0.0037806
AK051928	0.489935	0.0135136	-0.328787	0.159945	0.161129	0.533624
AK053708	-1.29941	2.41971e-17	0.354174	0.0928373	-0.945198	7.68274e-10
AK054122	0.359128	0.0583862	-0.163057	0.526474	0.196057	0.361473
AK057615	-0.252222	0.183613	-0.169026	0.492889	-0.421239	0.0239257
AK075572	1.10617	4.13837e-09	-0.182989	0.425522	0.923113	3.59356e-06
AK076583	1.11555	7.3583e-30	-0.292366	0.00445171	0.823165	2.63521e-15
AK077171	0.996923	1.33695e-10	-0.620916	0.000128531	0.375983	0.0349294
AK077427	0.310196	0.631899	-0.591924	0.419547	-0.281717	0.67709
AK077428	-0.176126	0.360083	0.162605	0.490962	-0.0135198	0.970613
AK078466	-0.34589	0.102871	-0.460326	0.0852994	-0.80616	0.000345133
AK078647	0.0651397	0.785822	-0.217601	0.386319	-0.152456	0.491606
AK078801	-0.326634	0.0964629	-0.0276691	0.961756	-0.354284	0.0690009
AK079263	0.230085	0.322786	-0.735978	0.00309576	-0.505865	0.0434671
AK079754	-0.189103	0.381134	0.132478	0.653094	-0.0566193	0.820326
AK080083	0.351667	7.5025e-06	-0.106516	0.274706	0.245149	0.00268079
AK080187	2.6707	3.47017e-130	-1.41284	1.14286e-48	1.25781	2.78017e-21
AK080484	-0.602393	0.000279392	-0.114717	0.671678	-0.717079	3.1383e-05
AK081204	1.39388	7.26708e-17	-0.986413	3.94901e-09	0.407423	0.0490899
AK081223	-0.866226	1.31403e-08	0.381727	0.0406187	-0.48448	0.00164817
AK081796	0.215273	0.336499	-0.0469826	0.915437	0.168277	0.484608
AK083567	-0.969978	4.83045e-21	-0.0811286	0.655323	-1.05109	1.12536e-22
AK083815	-0.561321	0.00250201	0.00572233	0.995831	-0.555583	0.00317813
AK084265	-0.993298	1.89315e-09	0.835571	3.40832e-06	-0.157708	0.364662
AK085685	0.272112	0.688419	-0.16891	0.8621	0.103188	0.905034
AK085695	-0.198633	0.0550438	-0.349784	0.00232751	-0.54841	1.47964e-07
AK085761	0.328456	0.0449935	-0.00100652	1	0.327438	0.0468063
AK085942	0.533611	0.00140683	-0.0272242	0.929631	0.506365	0.0034155
AK086315	0.052092	0.797691	-0.199361	0.343889	-0.147266	0.439484
AK086749	1.09964	2.55345e-10	0.137055	0.523819	1.23663	1.13906e-12
AK086881	0.255753	0.266237	-0.0296501	0.956884	0.226083	0.354452
AK087340	-0.0655312	0.749227	-0.117948	0.629023	-0.183473	0.3105
AK087376	0.380049	0.0559701	-0.145029	0.589362	0.235002	0.282204
AK087617	1.28605	7.0934e-10	-0.600292	0.00502622	0.685674	0.00435521
AK087850	0.570971	1.69272e-08	-0.783766	2.63474e-13	-0.212795	0.0821525
AK089957	-0.45326	0.0135274	-0.115033	0.676758	-0.56828	0.00221459
Ak1	0.279173	0.00666949	0.54193	1.37704e-07	0.821102	5.53381e-17
AK132440	-0.358412	0.058594	-0.133253	0.62181	-0.491652	0.00989222
AK132720	0.296273	0.110975	-0.139708	0.570297	0.156555	0.460432
AK132885	2.37107	4.72017e-27	-0.875754	5.55021e-06	1.4951	8.64345e-09
AK133808	-0.275104	0.153191	0.123486	0.648223	-0.151608	0.45933
AK134203	-0.522134	0.0160657	-0.0581278	0.91827	-0.580215	0.00871143
AK134717	-0.219157	0.0497877	-0.066765	0.684014	-0.285917	0.0117295
AK135004	0.610641	9.87778e-05	0.0760094	0.737448	0.686627	1.49139e-05
AK136817	-0.245451	0.170083	-0.105056	0.693963	-0.350493	0.0568517
AK137356	1.57813	1.30681e-17	-0.787043	2.86938e-05	0.791051	7.59123e-05
AK137428	0.0747829	0.375364	0.200212	0.0178018	0.274995	0.00034753
AK138307	-0.0284934	0.931953	0.442362	0.0751816	0.413848	0.0666869
AK139889	3.63132	1.0863e-29	0.338344	0.139034	3.96858	2.94673e-37
AK139999	0.412137	0.0598821	-0.546525	0.0227861	-0.134391	0.647617
AK140178	-0.0373955	0.90506	-0.156331	0.59873	-0.193715	0.441621
AK140218	0.93662	3.63173e-09	0.0651349	0.788571	1.00172	4.86237e-10
AK140725	0.211053	0.213359	-0.246678	0.199492	-0.0356269	0.867401
AK141205	-0.307598	0.11299	0.0505747	0.879334	-0.257016	0.200355
AK141620	-0.114913	0.579521	0.4056	0.0458596	0.290683	0.124361
AK142089	0.310609	0.080021	-0.363644	0.0684772	-0.053038	0.814111
AK143968	-0.426104	0.0129072	0.335795	0.0937513	-0.0903002	0.662305
AK144545	0.326897	0.60663	-0.0575989	0.963212	0.26927	0.697233
AK144695	3.09445	7.59312e-166	-0.131681	0.204524	2.96269	1.95156e-144
AK144882	0.00102784	1	-0.445357	0.567072	-0.444296	0.492846
AK145301	0.583938	0.0207031	0.79578	0.000172883	1.37961	2.43655e-10
AK145379	3.66784	3.38712e-282	-0.117275	0.337381	3.55057	2.40305e-267
AK146690	-0.203664	0.280185	0.239759	0.272417	0.0360972	0.882714
AK148054	-0.37823	0.000141357	-0.23868	0.0348772	-0.61691	3.00612e-10
AK148282	0.549881	0.00212061	0.0287146	0.937353	0.578566	0.00153992
AK149132	-1.46215	1.91907e-22	0.231948	0.30345	-1.23016	4.71661e-16
AK150559	-0.373253	0.0286514	-0.253459	0.269936	-0.626687	0.000366013
AK152437	-0.723096	5.79082e-05	0.346402	0.137255	-0.376668	0.0431258
AK153354	-0.242426	0.201004	0.0490536	0.865526	-0.193368	0.327714
AK153575	1.34775	0.0242881	0.0961232	0.926117	1.44368	0.0148406
AK153603	-0.237798	0.178496	0.39497	0.0344018	0.157172	0.39421
AK153645	0.447528	0.013922	0.272404	0.162454	0.719901	4.05277e-05
AK153821	-0.426493	0.0221893	0.0656153	0.833944	-0.360868	0.0590085
AK154077	-0.0574581	0.801173	-0.0243158	0.946779	-0.0817719	0.72413
AK154190	-0.377344	0.0338878	0.563717	0.00218296	0.186374	0.300515
AK154309	1.85311	5.0341e-26	-0.0343835	0.899438	1.81862	9.93561e-24
AK155592	-0.406514	0.0153989	-0.586899	0.00434073	-0.993373	1.90202e-08
AK155692	-1.72051	1.35307e-70	2.72154	1.50742e-164	1.00104	5.92597e-26
AK155917	-2.41949	9.36097e-35	0.885098	0.001692	-1.53426	4.19479e-17
AK156119	1.30823	1.31171e-13	0.00667681	0.995678	1.31487	1.81634e-13
AK157795	-0.308319	0.000814938	0.152179	0.178125	-0.156138	0.107888
AK157878	-0.25182	0.212008	0.138995	0.595794	-0.112821	0.60784
AK158379	-0.259982	0.181675	0.59716	0.00209652	0.337175	0.0719648
AK159995	0.0387975	0.864925	-0.267798	0.222423	-0.228997	0.238218
AK160359	-0.389872	0.0427159	0.348531	0.121455	-0.0413313	0.866406
AK160408	-0.335878	0.0768497	-0.179065	0.484376	-0.51493	0.0067953
AK160668	1.09705	1.99718e-10	0.103754	0.649865	1.20074	6.74719e-12
AK161424	0.296301	0.0888951	0.46421	0.00541544	0.760489	1.59454e-06
AK161900	-0.305677	0.0785154	-0.161493	0.522618	-0.467153	0.00826788
AK162043	-0.282511	0.156552	-0.0759396	0.804169	-0.35844	0.0687932
AK162386	-0.955456	5.57092e-09	0.624689	0.000931769	-0.330744	0.0468063
AK162942	-0.215481	0.221022	0.52556	0.00182626	0.310075	0.0560399
AK163075	0.49797	0.0240523	0.185158	0.498019	0.683079	0.00137587
AK163149	0.0724154	0.554746	-0.00654629	0.986275	0.065868	0.597018
AK163592	-0.0141977	0.965554	0.108848	0.641657	0.0946487	0.629088
AK163710	0.373709	0.000190208	-0.539823	3.95718e-07	-0.166114	0.155354
AK164124	0.614007	0.00159529	0.276252	0.210937	0.890233	2.44067e-06
AK164779	0.153328	0.434991	-0.0790895	0.770601	0.0742364	0.738424
AK165532	0.0783269	0.776493	0.143084	0.635581	0.221398	0.339661
AK167137	-1.70191	5.02759e-20	0.933593	3.14359e-05	-0.768259	1.14769e-05
AK168184	0.30542	0.108739	0.298702	0.149425	0.604097	0.000839936
AK168779	0.00866448	1	0.0218147	0.98132	0.0304772	0.93137
AK169777	0.266922	0.16865	-0.35248	0.105384	-0.0855579	0.707111
AK169954	0.368421	0.0302286	-0.31703	0.1057	0.0513844	0.826939
AK170612	-0.771297	3.58919e-16	-0.0183001	0.930346	-0.789586	5.3087e-16
AK171902	1.33807	1.29726e-72	-0.614603	1.89747e-16	0.723463	4.65723e-20
AK171960	-0.183123	0.0953783	-0.0966011	0.524031	-0.27972	0.011919
AK171985	0.14191	0.503986	-0.0767756	0.78829	0.0651313	0.777018
AK177800	0.459246	0.0129207	-0.146484	0.554296	0.312753	0.107343
AK178359	-0.740045	3.54744e-13	-0.190543	0.182261	-0.930573	2.70564e-18
AK178429	-0.380184	0.0348421	0.0666933	0.814526	-0.313474	0.0888674
AK178890	0.354713	0.0610265	-0.166166	0.495281	0.188541	0.356704
AK179044	-0.156017	0.356471	-0.279014	0.147109	-0.435019	0.0071613
AK179207	-0.116473	0.298987	-0.0754907	0.61133	-0.191961	0.0805173
AK179349	1.13452	1.99466e-37	-0.492363	3.45932e-08	0.642146	1.96566e-11
AK179786	-0.610135	0.00033552	0.648467	0.000386504	0.0383397	0.850761
AK180077	0.634299	0.00694365	1.04998	1.16638e-08	1.68418	5.02796e-18
AK180240	0.558333	9.42475e-08	-0.460134	3.57698e-05	0.0981948	0.452385
AK180697	0.488844	0.0214316	0.139552	0.615791	0.628352	0.00289427
AK180745	1.68012	7.68654e-20	0.133403	0.56388	1.81347	9.20304e-23
AK181663	-0.597671	0.00168279	0.5693	0.00605658	-0.0283587	0.925757
AK181697	-0.47574	4.70418e-10	0.128263	0.185059	-0.347475	8.29297e-06
AK181773	1.04834	3.3499e-22	0.260906	0.0168214	1.30923	2.27872e-34
AK181808	-0.375887	0.000274471	-0.177351	0.155385	-0.553237	6.84266e-08
AK181830	0.280222	0.168188	0.0330909	0.927156	0.313296	0.123055
AK181950	1.01258	1.92277e-07	0.0768416	0.787111	1.08938	2.26708e-08
AK182375	-0.0455932	0.855175	-0.160774	0.53604	-0.206363	0.316247
AK182522	-0.824075	1.86837e-05	0.359457	0.166898	-0.464582	0.0182104
AK182655	-0.0754099	0.440312	0.215949	0.0269988	0.140538	0.127709
AK182695	-0.136461	0.579317	-0.191663	0.530293	-0.328102	0.162478
AK182874	-0.353606	0.600958	0.301093	0.731504	-0.0524983	0.95789
AK182887	0.713625	5.40339e-17	0.102786	0.330468	0.816404	1.30005e-21
AK184064	-1.00192	3.06194e-07	0.1454	0.660408	-0.856459	1.89416e-05
AK184121	0.592484	0.00378298	0.854331	1.01222e-06	1.44675	1.02916e-15
AK184225	-0.83138	1.67627e-07	0.0404661	0.9074	-0.790882	1.30561e-06
AK184299	-0.149322	0.451164	0.198538	0.404494	0.0492163	0.820176
AK184603	-0.368595	0.0816061	0.283448	0.266624	-0.085135	0.725218
AK184946	1.41339	1.80532e-80	-0.17933	0.0300827	1.23405	2.88481e-59
AK185415	0.0128196	0.971482	-0.0897508	0.73828	-0.0769301	0.715887
AK185681	-0.12626	0.190647	0.101299	0.389821	-0.0249602	0.826293
AK186390	-0.416724	0.0595438	0.337985	0.218891	-0.0787228	0.761154
AK186759	0.630186	3.27657e-11	0.113041	0.330425	0.743218	8.24903e-15
AK187989	0.763005	9.03454e-07	-0.314232	0.0728732	0.448752	0.00850701
AK188430	-0.745673	1.23598e-05	-0.111651	0.670926	-0.857309	6.75431e-07
AK188772	0.105882	0.219986	-0.812866	2.95204e-22	-0.70698	3.62938e-17
AK189100	-0.183938	0.444849	0.328161	0.175184	0.144222	0.534784
AK189470	-0.0503014	0.833249	-0.0693496	0.813757	-0.119648	0.593483
AK189633	1.12807	1.00966e-36	-0.404733	8.25395e-06	0.723328	2.65082e-14
AK189692	-0.24953	0.00365393	-0.0627204	0.608485	-0.312249	0.000326257
AK190465	-0.0971077	0.705421	-0.107134	0.720638	-0.20423	0.359277
AK190497	0.0625025	0.855686	0.405456	0.107541	0.467931	0.038568
AK190779	-0.318764	0.0848112	0.368965	0.0689225	0.0502023	0.81603
AK190918	-0.390819	0.552079	0.518363	0.494105	0.12755	0.864303
AK191498	-0.335387	0.0577649	0.00494819	1	-0.330424	0.0736009
AK191694	0.265619	0.146359	-0.326184	0.110407	-0.0605669	0.786301
AK192194	1.16535	4.58751e-41	-0.7155	1.15162e-16	0.449841	3.61932e-06
AK192544	2.1127	7.73656e-26	0.511091	0.00649495	2.62368	3.6311e-40
AK192647	0.524215	3.69214e-07	-0.442291	6.16898e-05	0.0819196	0.524892
AK192985	1.04509	0.0850714	0.464527	0.534275	1.50944	0.0105393
AK193082	0.451601	0.493528	0.302247	0.709199	0.75378	0.208693
AK193268	-0.14582	0.538173	0.0860086	0.814934	-0.0598046	0.829699
AK193649	-0.332905	0.0005175	0.0631747	0.656831	-0.269727	0.00654996
AK194371	0.0353958	0.870368	-0.13413	0.551911	-0.098732	0.600183
AK196015	-1.10995	1.19632e-31	0.22674	0.0717534	-0.883194	2.63684e-20
AK196308	0.540003	1.32103e-07	-0.508212	2.41283e-06	0.0317901	0.801557
AK196542	-0.33906	0.0620718	-0.313673	0.145653	-0.65272	0.000277581
AK196840	-0.180606	0.407913	0.151632	0.604664	-0.028969	0.914509
AK197526	-0.0894925	0.464107	0.00916685	0.971935	-0.0803241	0.533305
AK197973	-0.226429	0.0248453	-0.229841	0.0519514	-0.456265	7.36205e-06
AK198029	0.463085	0.480354	0.345164	0.669663	0.808178	0.175542
AK198376	1.6763	2.63698e-74	-0.167763	0.084863	1.50852	5.80798e-57
AK198904	1.10663	7.35988e-34	-0.375709	5.94441e-05	0.730911	5.50855e-14
AK199258	0.224122	0.270333	0.158886	0.522618	0.382998	0.0490189
AK199358	0.415117	6.36343e-07	-0.456361	1.86749e-07	-0.0412446	0.695676
AK199574	4.23229	1.69274e-08	0.0913554	0.940429	4.32127	9.17534e-09
AK199844	4.39137	2.40163e-92	-2.14246	2.36882e-39	2.24844	5.44295e-14
Ak2	-0.47922	6.81297e-09	0.180427	0.0728668	-0.298791	0.000442519
AK201917	0.190513	0.348081	0.174114	0.471561	0.364619	0.062032
AK202301	-0.857072	2.27997e-30	-0.0399575	0.748206	-0.897025	5.96463e-32
AK202516	-0.125156	0.267093	0.272162	0.0179698	0.147005	0.184903
AK202543	0.601434	0.00120174	-0.478745	0.0199456	0.122681	0.587006
AK203815	-0.302362	0.0892724	0.0337866	0.928866	-0.268563	0.15592
AK204212	0.0287392	0.89851	-0.0515867	0.864248	-0.0228473	0.928025
AK204365	-0.128683	0.532039	-0.364497	0.10112	-0.493169	0.0100736
AK204506	-0.632144	0.000358328	-0.137945	0.646705	-0.770049	3.10882e-05
AK204572	-0.29932	0.00241881	-0.245569	0.0250463	-0.544889	1.48414e-08
AK204943	0.00131376	1	-0.469462	0.0094075	-0.468136	0.00508074
AK205023	2.01772	2.20213e-82	-0.0507109	0.695913	1.96697	6.4528e-75
AK205703	0.463589	1.66163e-06	-0.283469	0.00790223	0.180116	0.0954516
AK205936	0.633278	1.77119e-15	-0.33682	7.84056e-05	0.296455	0.000539755
AK206180	0.893018	1.54922e-34	-0.439931	6.54258e-09	0.453085	3.8724e-09
AK206234	-0.135676	0.533027	0.0744903	0.811102	-0.0611826	0.799662
AK206687	0.260244	0.12563	0.250021	0.175184	0.51025	0.00159656
AK207571	-0.376522	2.52342e-05	0.166605	0.128001	-0.209914	0.0240285
AK207580	0.226877	0.266375	0.249348	0.272167	0.476214	0.0122892
AK207593	0.247507	0.0170668	-0.337308	0.00269523	-0.089801	0.458856
AK207784	-0.200338	0.332404	-0.2835	0.246813	-0.483813	0.0189156
AK208069	-2.2962	1.56222e-37	0.652361	0.0127234	-1.64374	8.36049e-22
AK208136	-0.70993	0.00023468	0.141243	0.637634	-0.568648	0.00444148
AK208404	-0.0828387	0.675304	-0.205106	0.36075	-0.287936	0.116282
AK208460	-0.30234	0.00343433	0.101124	0.465303	-0.201213	0.0630156
AK208502	-0.460672	0.0107005	-0.0341258	0.943199	-0.494773	0.00730664
AK208554	0.515634	0.00689187	-0.228502	0.332909	0.287109	0.179245
AK208648	-0.117024	0.323454	0.410514	0.000238636	0.293488	0.00611276
AK208673	-0.0709079	0.779106	-0.350039	0.147891	-0.420926	0.0434978
AK209396	0.391957	3.89449e-05	0.129286	0.25703	0.521237	4.22853e-08
AK209647	-0.138702	0.205482	-0.115768	0.404668	-0.254467	0.018869
AK209885	-0.410186	0.0210298	-0.310017	0.153073	-0.72019	5.27947e-05
AK209947	-0.0923286	0.764393	0.138117	0.661557	0.0457883	0.897341
AK210432	0.117133	0.28287	0.0460367	0.763775	0.163168	0.127845
AK210555	0.098269	0.715428	0.156755	0.567235	0.25501	0.261369
AK210685	0.396111	0.041925	0.0481022	0.872532	0.4442	0.0225456
AK210908	-0.45857	0.0111543	0.475378	0.0176962	0.0168148	0.979344
AK211096	0.313243	0.0878792	-0.338811	0.103625	-0.0255731	0.949306
AK211100	-0.800295	0.181139	0.432298	0.585193	-0.367951	0.550961
AK211593	-0.413296	0.0309972	-0.130788	0.662447	-0.544054	0.00669485
AK211817	0.87053	6.91985e-06	0.0263388	0.946779	0.896836	4.40313e-06
AK212603	0.0865914	0.661833	0.236526	0.219291	0.323108	0.058265
AK212965	-0.0862531	0.705412	0.102797	0.706001	0.0165443	0.95852
AK213344	0.620967	0.00360827	-0.065934	0.86161	0.554985	0.0133187
AK213404	0.0278647	0.935313	-0.0708286	0.866527	-0.0429622	0.930697
AK213749	-0.110953	0.599859	-0.195684	0.415812	-0.306631	0.114197
AK213775	-0.207339	0.314956	-0.439246	0.0584209	-0.646553	0.00146422
AK213804	0.521529	0.0175932	0.813954	1.17922e-05	1.33541	1.86452e-12
AK214184	0.242385	0.241848	0.0362537	0.916921	0.27863	0.177169
AK214451	-0.258622	0.23663	-0.115119	0.751235	-0.373716	0.0995316
AK214463	-0.0538619	0.830634	0.143699	0.567811	0.0898356	0.667679
AK214512	0.509884	3.15172e-07	-0.43647	3.88952e-05	0.0734109	0.559867
AK214641	1.62534	8.13462e-54	-0.581932	5.77282e-09	1.04338	1.92982e-19
AK214897	-0.227762	0.337355	0.00590223	1	-0.221842	0.361794
AK215051	-0.00557869	1	0.214942	0.360553	0.20936	0.29236
AK215526	2.00613	5.16268e-26	0.672965	7.81843e-06	2.67894	4.33537e-50
AK215672	-0.991316	3.80058e-07	0.414155	0.116809	-0.577114	0.00336833
AK215772	-0.208894	0.273601	0.164289	0.48978	-0.0446029	0.836314
AK215907	-0.439346	0.0133448	0.0419709	0.896621	-0.397366	0.0284147
AK216694	-0.105707	0.670117	0.174923	0.55896	0.0692151	0.833382
AK216920	0.660295	0.000267186	-0.419341	0.0379958	0.240943	0.234121
AK217047	-0.416669	0.0182362	-0.0157363	0.986415	-0.432385	0.018146
AK217252	0.0591293	0.807163	0.0755169	0.803885	0.134643	0.539254
AK217604	0.0605128	0.811378	0.0373485	0.923835	0.0978563	0.653374
AK217614	0.519132	5.53686e-10	0.079752	0.463699	0.59888	1.03763e-12
AK217757	-0.799757	3.34173e-05	-0.0234777	0.980365	-0.823179	4.20393e-05
AK218719	-0.535978	9.88539e-09	0.238979	0.0314872	-0.296994	0.00194101
AK219268	0.784883	0.000999524	0.849954	1.92294e-05	1.63472	5.7537e-15
AK219583	-0.292126	0.00414647	0.192887	0.110738	-0.0992359	0.374029
AK219629	0.282869	0.160097	0.260093	0.244684	0.542948	0.0040914
AK219945	-0.0358565	0.777836	-0.289937	0.0171191	-0.325789	0.00354258
AK219995	-0.431812	0.0496936	0.268068	0.339637	-0.163725	0.503144
Ak3	0.757632	4.56589e-20	0.34504	3.57698e-05	1.10267	2.25874e-42
Akap1	0.312351	0.000151962	0.20626	0.0212142	0.518608	1.25019e-10
Akap10	0.11376	0.339814	-0.396062	0.000866581	-0.282298	0.0160253
Akap11	0.0633325	0.468506	0.286426	0.000475005	0.349758	5.71606e-06
Akap13	0.752615	1.95072e-24	-0.0854989	0.367926	0.667113	6.92763e-19
Akap17b	0.452995	0.0523387	0.165645	0.591432	0.618589	0.00758575
Akap2	-0.101133	0.361909	-0.267156	0.0190351	-0.368288	0.000325473
Akap6	2.94947	1.17773e-225	0.2644	0.000862136	3.21383	1.06567e-268
Akap7	-0.169909	0.414442	0.0188779	0.964971	-0.151022	0.481274
Akap8	0.00146912	1	-0.160797	0.112547	-0.159327	0.0798771
Akap8l	0.347971	0.000674338	-0.22226	0.0567244	0.125708	0.27991
Akap9	0.607534	4.11063e-14	-0.255008	0.00393255	0.352523	3.48876e-05
Akirin1	0.435781	8.67813e-08	0.0247157	0.849134	0.460494	2.19125e-08
Akirin2	0.311333	9.1433e-05	0.163173	0.0692174	0.474504	1.36476e-09
Akna	-0.996333	1.97075e-10	-0.0355325	0.925523	-1.03183	2.03733e-10
Aknad1	4.91425	5.20432e-89	-0.930517	1.56375e-07	3.9832	8.40421e-52
Akr1a1	-0.192001	0.0628937	-0.0846562	0.526033	-0.276657	0.00617533
Akr1b10	1.83775	1.09268e-59	-0.525061	4.3697e-07	1.31265	1.10903e-26
Akr1b3	0.657089	3.04326e-11	-0.363506	0.000746171	0.293583	0.00443778
Akr1b8	1.72851	2.21705e-115	-0.734255	5.94759e-23	0.994243	1.35723e-34
Akr1e1	0.122303	0.614665	0.0576517	0.869119	0.179944	0.425435
Akr7a5	-0.414933	0.0219231	0.202559	0.382132	-0.212369	0.26452
Akt1	0.713232	2.41941e-13	-0.500438	1.17221e-06	0.212793	0.0397615
Akt1s1	-0.33529	3.06939e-05	-0.0392379	0.75575	-0.374525	4.4719e-06
Akt2	1.82713	1.19546e-76	-0.394673	0.000173662	1.43245	1.23942e-47
Akt3	0.517306	6.17716e-09	-0.200012	0.0494274	0.31729	0.000867592
Aktip	0.415205	6.8285e-05	0.156013	0.197961	0.57121	3.12859e-08
Alad	-0.292238	0.00237539	-0.120679	0.345505	-0.412913	2.48193e-05
Alas1	0.68642	4.83143e-12	0.287947	0.0044525	0.974355	1.91126e-23
Alcam	-1.19464	2.49427e-54	0.116257	0.293348	-1.07837	2.40758e-43
Aldh16a1	-0.355484	0.0501804	-0.128186	0.623284	-0.48366	0.00782329
Aldh18a1	0.147512	0.0620536	-0.0802933	0.415518	0.0672186	0.430545
Aldh1l2	-0.990159	2.5299e-23	0.794934	1.2687e-14	-0.195224	0.0637726
Aldh2	-0.785859	3.36729e-15	-0.177166	0.156307	-0.963022	7.88317e-22
Aldh3a1	-0.916609	2.63342e-09	-1.48351	1.15992e-11	-2.4	1.21839e-36
Aldh3a2	-0.276294	0.00176441	-0.0619372	0.629525	-0.338228	0.000164497
Aldh3b1	1.73674	1.15897e-49	0.652213	3.97909e-12	2.3889	4.94323e-102
Aldh4a1	0.298054	0.107316	-0.2286	0.302825	0.0694508	0.757878
Aldh6a1	0.0621536	0.777502	0.172403	0.470021	0.234552	0.231516
Aldh7a1	-0.4455	1.66091e-05	-0.128241	0.386604	-0.573732	7.47652e-08
Aldh9a1	-0.568825	0.00110297	0.294029	0.162242	-0.274789	0.131299
Aldoa	2.03008	9.35436e-98	0.584843	3.55913e-09	2.61492	1.30637e-155
Aldoart1	1.78814	3.30432e-17	0.716277	0.000160414	2.5043	1.84691e-34
Alg1	-0.17716	0.0994024	0.143772	0.260668	-0.0333875	0.791193
Alg10b	0.253414	0.00127412	-0.468955	6.96338e-09	-0.21554	0.00944366
Alg11	-0.317142	0.0887789	0.0570392	0.853276	-0.260096	0.174042
Alg12	-0.561019	0.000284138	0.111848	0.646705	-0.449155	0.0043629
Alg13	-0.033299	0.886811	-0.229808	0.255588	-0.2631	0.134478
Alg14	0.141944	0.460735	-0.0170675	0.956775	0.124871	0.510612
Alg2	-0.524214	2.10834e-07	0.413341	0.000181138	-0.11087	0.305695
Alg3	0.0342899	0.89032	-0.32937	0.136479	-0.295074	0.140204
Alg5	-0.467712	1.12861e-05	0.308034	0.0117926	-0.159673	0.157553
Alg6	-0.0775057	0.689141	-0.29881	0.138468	-0.376303	0.0320858
Alg8	-0.659127	0.000360174	-0.0944605	0.758867	-0.753567	5.95952e-05
Alg9	0.287138	0.116049	-0.300656	0.148376	-0.0135198	0.970613
Alkbh1	0.164134	0.427276	-0.177952	0.473374	-0.0138191	0.973308
Alkbh3	0.161821	0.14098	0.0392274	0.813806	0.201046	0.0671266
Alkbh4	-0.36614	0.111453	0.147118	0.66427	-0.218999	0.380424
Alkbh5	0.0787722	0.492656	0.333673	0.00250952	0.412445	5.4007e-05
Alkbh6	-0.582489	0.000326392	-0.267618	0.239257	-0.850074	4.54998e-07
Alkbh7	0.529388	0.00155834	0.167659	0.414818	0.697021	2.32003e-05
Alkbh8	0.0331388	0.897116	-0.117241	0.613807	-0.0841	0.671874
Alms1	-0.283128	0.0898882	-0.207228	0.342074	-0.490339	0.00344999
Alox5	-0.856071	2.47717e-15	0.613052	2.52414e-07	-0.243011	0.0282172
Alox5ap	1.53564	4.55406e-10	0.686543	0.000505323	2.22195	9.71433e-23
Alpk1	1.04543	2.98793e-11	-0.677828	3.54598e-05	0.367578	0.0492831
Alpk2	1.04329	3.42536e-07	0.733884	2.99552e-05	1.77707	4.13882e-21
Alpk3	3.44936	3.20804e-160	0.724171	2.31167e-18	4.1734	1.80218e-259
Als2	0.538567	5.81857e-09	-0.283756	0.00508644	0.254807	0.0119153
Alx1	-0.212952	0.763051	0.570154	0.441779	0.357187	0.58173
Alyref	-0.394607	2.42124e-07	-0.187606	0.0411831	-0.58221	5.2007e-14
Alyref2	0.462281	0.475979	-0.0103697	1	0.451862	0.479111
Amacr	2.12531	6.25384e-127	-0.68246	2.49e-17	1.44283	1.99871e-52
Ambra1	0.183775	0.065202	0.0777058	0.543146	0.261478	0.0077726
Amd1	-0.398582	3.92763e-07	-0.116602	0.257134	-0.515181	1.01843e-10
Amdhd2	-0.329544	0.0411481	0.0211904	0.957437	-0.308343	0.0644441
Amfr	-0.234805	0.0245609	0.313121	0.00467024	0.0783158	0.486803
Amigo1	1.12114	1.20117e-09	0.825662	8.83296e-08	1.94672	1.07201e-30
Ammecr1	1.81584	2.56446e-121	0.0761308	0.427242	1.89196	1.97285e-122
Ammecr1l	-0.182825	0.0342099	-0.305593	0.00113848	-0.488415	1.06732e-08
Amn1	0.736607	1.95482e-05	0.407486	0.0170711	1.14405	6.36036e-12
Amot	0.854166	5.17176e-17	0.334859	0.000859675	1.18901	1.39082e-32
Amotl1	0.49697	1.21316e-06	-0.153107	0.222405	0.343862	0.0010476
Amotl2	-0.623957	5.84124e-10	-0.622746	8.93959e-09	-1.2467	1.10361e-34
Ampd2	-0.623794	9.90383e-14	-0.00997023	0.958362	-0.633759	1.41717e-13
Ampd3	0.189032	0.0782287	0.335179	0.00143045	0.524205	1.22057e-07
Amz2	-0.297602	0.00191584	0.0637772	0.655059	-0.233822	0.0187554
Anapc1	-0.159346	0.141842	-0.0952446	0.48686	-0.25459	0.0158896
Anapc10	-0.0448522	0.829446	0.166704	0.410136	0.121849	0.48901
Anapc11	-1.2193	1.68647e-51	0.240289	0.0210232	-0.979004	3.78782e-33
Anapc13	-0.159168	0.433742	-0.247583	0.288598	-0.406743	0.033444
Anapc16	-0.193558	0.0367736	-0.244102	0.020216	-0.437657	2.38225e-06
Anapc2	-0.311277	7.12002e-05	0.123658	0.202943	-0.187617	0.0207975
Anapc4	0.0868192	0.345617	-0.00680638	0.971059	0.0800123	0.395038
Anapc5	-0.124888	0.259592	0.107597	0.419626	-0.0172904	0.89149
Anapc7	0.351094	5.3762e-05	-0.0172554	0.909392	0.333836	0.00017347
Angel1	0.475159	0.0438299	0.409845	0.090232	0.884937	6.2995e-05
Angel2	0.14544	0.1489	-0.235668	0.0303888	-0.0902287	0.414324
Angpt1	-0.0460137	0.663777	0.452756	4.22388e-07	0.40674	2.83017e-06
Angptl2	-1.03108	4.78629e-26	0.298198	0.00761663	-0.73288	8.34793e-14
Angptl4	-1.89854	2.86157e-37	-0.26616	0.312123	-2.16462	4.73482e-42
Angptl6	-1.28503	5.78729e-10	0.872061	0.000380924	-0.412911	0.0458159
Ank	-1.03092	2.56014e-26	-0.0430893	0.779436	-1.07401	3.26918e-28
Ank1	2.5273	1.1497e-216	-0.420115	1.32124e-08	2.10717	2.50108e-144
Ank2	0.706526	5.44113e-15	-0.327693	0.000719309	0.378828	0.000101613
Ank3	0.509736	0.00610488	0.151706	0.526474	0.661426	0.000297781
Ankfy1	-0.16475	0.0390283	-0.126344	0.184415	-0.291092	0.000221276
Ankhd1	0.232416	0.00664291	0.00903403	0.956316	0.241449	0.0053946
Ankib1	-0.351094	2.42294e-05	-0.0749999	0.525119	-0.426091	4.53268e-07
Ankle2	-0.0806264	0.404546	0.18919	0.0580869	0.108563	0.248987
Ankmy2	-0.168684	0.316382	-0.124461	0.575343	-0.293137	0.0797
Ankra2	-0.128473	0.544603	0.165731	0.50481	0.0372594	0.884537
Ankrd1	0.577702	3.03892e-09	-1.23547	3.14445e-36	-0.657769	2.45013e-11
Ankrd10	1.94242	8.5063e-77	0.337311	0.00219463	2.27972	1.89227e-105
Ankrd11	0.098857	0.376189	-0.293893	0.00908227	-0.195036	0.0678622
Ankrd12	0.0521253	0.681813	0.175825	0.151361	0.227948	0.0345534
Ankrd13a	0.0185178	0.872419	0.193473	0.0544578	0.21199	0.0202149
Ankrd13b	-0.871724	8.00815e-28	0.0349237	0.804169	-0.836795	7.85402e-25
Ankrd13c	-0.311874	0.000463135	-0.0834019	0.504889	-0.395272	1.29955e-05
Ankrd16	0.0818389	0.663997	-0.121994	0.595175	-0.0401553	0.84967
Ankrd17	0.16095	0.0406539	0.172615	0.0428589	0.333564	1.00104e-05
Ankrd2	5.07802	3.52191e-261	-2.36424	2.30297e-114	2.71348	1.63536e-39
Ankrd23	3.0197	3.34902e-150	0.879686	8.40926e-29	3.8993	1.68131e-279
Ankrd24	0.0820071	0.790692	-0.0423441	0.92533	0.0396583	0.887971
Ankrd26	0.129279	0.459544	-0.639202	0.000363332	-0.509909	0.003296
Ankrd27	-0.138179	0.230169	-0.0566655	0.733711	-0.194841	0.0915819
Ankrd28	-0.746529	1.25716e-17	0.204201	0.0635072	-0.542322	8.41647e-10
Ankrd32	0.879711	5.85356e-16	-0.0906862	0.522516	0.789008	2.44767e-12
Ankrd33b	1.5362	6.7487e-47	0.0934894	0.449963	1.62966	2.23086e-51
Ankrd39	1.04101	1.77696e-07	0.0690423	0.825892	1.10997	3.45807e-08
Ankrd40	0.456095	9.57394e-06	-0.14066	0.271343	0.315433	0.00284319
Ankrd42	-0.625628	0.000406677	-0.072063	0.814934	-0.697656	0.000130529
Ankrd44	2.05748	3.11803e-81	-0.903117	2.48932e-20	1.15433	4.99065e-21
Ankrd46	-0.141686	0.112797	0.0159168	0.918646	-0.125768	0.170435
Ankrd49	-0.0330001	0.883101	0.0152188	0.975837	-0.0177805	0.96162
Ankrd50	0.473453	3.62957e-09	-0.311477	0.000323368	0.161974	0.0673052
Ankrd52	0.434987	1.88568e-08	-0.0831535	0.407657	0.351832	9.70471e-06
Ankrd54	-0.156032	0.432142	0.0478339	0.875775	-0.108196	0.60542
Ankrd9	0.159298	0.523522	0.634587	0.00144276	0.793848	3.39211e-05
Anks1	0.138034	0.47232	-0.322397	0.11236	-0.184362	0.336667
Anks3	0.276262	0.133158	-0.195534	0.380565	0.0807252	0.697233
Ankzf1	0.424526	0.0239976	-0.023874	0.952588	0.400641	0.0353558
Anln	-0.8773	3.39412e-30	-0.00708286	0.970902	-0.884378	1.47485e-29
Ano10	0.0910751	0.397836	0.285284	0.00587976	0.376356	0.000103789
Ano5	1.98144	7.43256e-99	0.617757	2.91937e-15	2.59917	1.07505e-177
Ano6	-0.609678	1.00817e-09	-0.062755	0.668557	-0.672431	1.80592e-11
Ano8	-0.140282	0.119192	0.167343	0.0944146	0.0270608	0.79591
Anp32a	0.108529	0.205581	-0.254996	0.00399718	-0.146467	0.0907739
Anp32b	-0.487666	1.25606e-06	0.0275217	0.866527	-0.460143	5.38182e-06
Anp32e	0.713813	1.41711e-12	-0.413416	0.000140935	0.300396	0.00458977
Anpep	-1.00306	4.70741e-09	0.376031	0.0741774	-0.627016	0.000294394
Antxr1	-0.0625489	0.609684	-0.20916	0.100717	-0.271706	0.015519
Antxr2	-0.367759	3.07999e-06	-0.00314452	0.992979	-0.370902	3.63589e-06
Anxa1	-0.837959	5.75386e-18	-0.0996679	0.449968	-0.937626	5.30842e-22
Anxa11	2.17047	1.7774e-96	0.249571	0.028117	2.42003	2.31338e-119
Anxa2	-1.08565	5.57026e-30	-0.10286	0.422229	-1.18851	2.0951e-35
Anxa3	-1.22102	2.08533e-66	-0.219142	0.0145973	-1.44015	1.84871e-87
Anxa4	0.000683862	1	-0.0680952	0.525881	-0.0674111	0.449435
Anxa5	-0.0241024	0.847354	-0.217511	0.0657429	-0.241613	0.0220189
Anxa6	1.23118	8.03006e-38	-0.176919	0.125338	1.05426	4.57548e-28
Anxa7	-0.0305844	0.810845	0.463209	2.11559e-05	0.432623	3.07709e-05
Anxa8	-2.61204	1.01364e-167	1.81431	5.11832e-70	-0.797709	7.8033e-23
Aox1	-0.519798	0.00503383	-0.140403	0.605158	-0.660184	0.00041378
Ap1ar	-0.296851	0.00264286	-0.0250987	0.887704	-0.321946	0.00146339
Ap1b1	-0.255039	0.00116438	0.18112	0.0430298	-0.0739185	0.389891
Ap1g1	0.00322443	0.983902	-0.132984	0.181673	-0.129759	0.141098
Ap1g2	-0.144525	0.572842	0.211261	0.463692	0.0667368	0.820955
Ap1m1	-0.317381	0.000408764	-0.0539895	0.692221	-0.371367	4.99129e-05
Ap1s1	-0.993026	8.63572e-37	0.0682189	0.578309	-0.924801	4.50817e-31
Ap1s2	0.0205766	0.881373	0.83255	1.65178e-19	0.85312	1.39285e-20
Ap1s3	-0.405566	0.0424706	-0.216582	0.444205	-0.622111	0.0024973
Ap2a1	0.0657455	0.579549	0.157444	0.21262	0.223189	0.0380048
Ap2a2	-0.498944	8.59833e-07	0.227844	0.053472	-0.271099	0.00935679
Ap2b1	0.0407594	0.739848	0.109288	0.41257	0.150047	0.171495
Ap2m1	-0.544777	4.86605e-08	0.369454	0.00069001	-0.175322	0.0970298
Ap2s1	-0.144634	0.165287	0.132762	0.282736	-0.0118709	0.93441
Ap3b1	-0.043486	0.669082	-0.00165774	1	-0.0451434	0.660805
Ap3d1	0.0646647	0.451009	-0.302637	0.000274368	-0.237972	0.00300328
Ap3m1	0.451732	1.23926e-07	-0.321941	0.000484684	0.129789	0.18045
Ap3m2	-0.541466	0.000416756	0.145319	0.507622	-0.396132	0.0116554
Ap3s1	-0.659761	6.08459e-16	-0.114852	0.316765	-0.774607	2.04648e-20
Ap3s2	0.247129	0.0102128	-0.124053	0.29236	0.123074	0.242349
Ap4b1	0.0218404	0.939632	0.0160152	0.973424	0.0378549	0.862517
Ap4e1	0.686917	6.00389e-12	-0.104704	0.410136	0.582204	2.30287e-08
Ap4m1	0.0143629	0.946978	-0.45016	0.012473	-0.435785	0.0101994
Ap4s1	0.286422	0.175566	0.200265	0.425129	0.48666	0.0146632
Apaf1	0.0360316	0.780743	-0.52566	4.51761e-06	-0.489623	1.16993e-05
Apba3	0.242843	0.0111763	-0.122119	0.298018	0.120722	0.250317
Apbb1	1.12641	5.87359e-28	0.0664012	0.617441	1.19279	2.70933e-30
Apbb1ip	-0.784781	2.9564e-07	-0.0927924	0.723354	-0.877542	3.11126e-08
Apbb2	0.341757	1.67166e-05	-0.5196	2.64113e-10	-0.177843	0.0405739
Apbb3	-0.0110556	0.985384	-0.399206	0.027914	-0.410251	0.0145747
Apc	0.712426	4.36878e-22	-0.457786	2.61012e-09	0.254638	0.00143436
Apcdd1	-1.00031	6.75797e-10	-0.0111909	1	-1.01146	1.78447e-09
Apeh	-0.245695	0.0126029	0.287508	0.00639989	0.0418131	0.714256
Apex1	-0.254056	0.0012912	-0.282489	0.001277	-0.536543	1.08243e-11
Apex2	0.0332467	0.915302	-0.0914135	0.761414	-0.0581649	0.844125
Aph1a	-0.217027	0.00444257	-0.055439	0.60242	-0.272466	0.000367458
Aph1b	-0.0631913	0.738653	-0.503339	0.00395976	-0.566516	0.000506051
Api5	-0.46482	2.10597e-10	-0.00029892	1	-0.465117	3.40572e-10
Apip	0.024796	0.899538	0.111164	0.627909	0.135956	0.451784
Aplf	-0.391099	0.0132796	0.22682	0.245743	-0.164271	0.342946
Aplp2	-0.609028	4.36033e-16	0.536061	7.57939e-12	-0.0729663	0.381961
Apoa1bp	-0.37087	0.000128901	-0.0816705	0.570297	-0.452535	5.25525e-06
Apobec1	-0.172161	0.41165	0.161941	0.53386	-0.010217	0.974799
Apobec2	4.32551	9.12801e-218	1.22708	7.07535e-59	5.55237	0
Apobec3	-0.943056	4.28594e-08	-0.352947	0.115299	-1.29598	3.17257e-13
Apol10b	0.234046	0.158402	-1.10002	2.92029e-10	-0.865943	8.94961e-07
Apol7d	0.23675	0.0129374	0.509351	1.09136e-08	0.746096	2.17282e-17
Apol9a	-0.748771	2.98954e-05	-0.802273	0.000187601	-1.551	2.87701e-16
Apol9b	-0.661299	0.000120039	-0.598972	0.00297239	-1.26025	1.14027e-12
Apoo	0.99157	2.54979e-08	0.197534	0.36228	1.18908	1.96147e-11
Apool	0.745855	4.14788e-05	0.13277	0.577194	0.878603	1.25015e-06
App	-0.0764937	0.488361	0.318174	0.00300442	0.24168	0.0168159
Appbp2	0.342088	0.000684988	-0.289063	0.00929871	0.0530219	0.665165
Appl1	0.0695135	0.486197	0.0560458	0.656831	0.125558	0.190908
Appl2	0.400995	0.0313507	0.0517738	0.860127	0.452757	0.0142252
Aprt	-0.775097	3.33732e-20	0.0110111	0.954667	-0.76408	7.19989e-19
Aptx	-0.125238	0.524216	-0.31874	0.134256	-0.443971	0.0158038
Aqp1	-3.99452	3.36231e-297	-0.263482	0.286662	-4.25789	1.39888e-292
Aqp5	-2.10503	1.10959e-124	0.29312	0.0174002	-1.81189	1.85528e-93
Aqr	0.48476	1.15113e-08	-0.55925	2.89687e-10	-0.0744908	0.473697
Ar	0.74127	0.00111167	0.136227	0.640801	0.87742	0.000108261
Araf	0.774911	1.2932e-23	-0.119523	0.20407	0.655383	1.53885e-16
Arap1	0.274736	0.00845295	0.150128	0.21539	0.424858	3.83902e-05
Arap2	-1.66286	1.47168e-21	0.184038	0.483221	-1.47878	3.87293e-17
Arcn1	0.0295495	0.810141	0.000489957	1	0.0300394	0.804989
Arf1	0.30349	0.00250477	0.152704	0.202246	0.456194	3.58868e-06
Arf2	-0.288108	0.000956967	-0.240104	0.018652	-0.528208	2.20228e-09
Arf3	-0.743914	3.27448e-14	-0.158179	0.199975	-0.902092	4.26122e-20
Arf4	-0.32751	0.00160268	-0.023061	0.892731	-0.35057	0.000745695
Arf5	-0.217398	0.0075885	0.429717	1.21493e-07	0.212318	0.00823825
Arf6	-0.573843	1.41114e-14	0.387693	1.48714e-06	-0.186149	0.0168889
Arfgap1	0.343331	0.000102155	-0.09423	0.406526	0.249099	0.00710454
Arfgap2	0.348678	8.56392e-06	-0.126395	0.180167	0.222281	0.00669611
Arfgap3	0.236764	0.00450691	0.36306	1.13743e-05	0.599821	3.00423e-14
Arfgef1	0.869292	5.59653e-31	-0.182743	0.0320338	0.686545	6.65944e-19
Arfgef2	0.234378	0.00978224	-0.131216	0.228494	0.10316	0.301285
Arfip1	0.261199	0.00145605	-0.0298154	0.813009	0.231382	0.00591472
Arfip2	-0.26724	0.00520783	-0.118576	0.357049	-0.385812	7.74014e-05
Arfrp1	-0.0120233	0.946978	-0.0879684	0.564065	-0.0999903	0.423464
Arglu1	0.279576	0.00137885	-0.261119	0.00622296	0.0184562	0.873201
Arhgap1	-0.710613	1.16438e-19	-0.390597	2.80959e-05	-1.1012	7.40113e-42
Arhgap10	0.749903	4.37689e-16	-0.456472	2.28025e-06	0.293426	0.00444696
Arhgap11a	-0.381374	7.2331e-05	-0.129248	0.318967	-0.510615	2.54503e-07
Arhgap12	0.654064	1.95193e-12	-0.336101	0.000753435	0.317958	0.00170336
Arhgap17	-0.276228	0.00993277	-0.0428056	0.803854	-0.319028	0.00369757
Arhgap18	0.934781	1.34694e-08	-0.0663583	0.778822	0.868382	3.69621e-07
Arhgap19	-0.00465808	1	0.158089	0.477867	0.153426	0.41138
Arhgap21	0.189792	0.0239231	-0.422261	9.67312e-07	-0.232468	0.00758069
Arhgap22	-0.350314	2.18401e-05	-0.382794	3.90906e-05	-0.733103	3.04407e-18
Arhgap23	0.328953	8.9671e-06	-0.486205	1.96795e-10	-0.157251	0.0496959
Arhgap24	2.32917	3.70238e-85	-0.367615	0.00047347	1.9615	1.11485e-53
Arhgap28	2.10684	2.30683e-129	-0.579739	3.6012e-13	1.52708	5.97498e-62
Arhgap29	0.85958	1.28458e-30	-0.459955	3.12729e-09	0.399623	5.49681e-07
Arhgap31	-0.370847	7.01191e-05	-0.41228	0.000142403	-0.783119	9.4135e-16
Arhgap32	-0.329736	0.0876184	-0.238605	0.324619	-0.568325	0.00318431
Arhgap33	-1.3325	1.24891e-13	1.02373	2.6122e-07	-0.308734	0.0783199
Arhgap39	1.00271	2.19328e-21	-0.467593	1.51863e-05	0.535104	4.13224e-06
Arhgap42	-0.119771	0.209213	-0.125044	0.273509	-0.244813	0.00877536
Arhgap44	0.253292	0.191013	0.392529	0.0476789	0.645809	0.000315983
Arhgap5	0.0132618	0.901799	0.213308	0.0190545	0.226569	0.00689579
Arhgdia	-0.309182	0.00189306	0.0529126	0.709091	-0.256269	0.0107692
Arhgdib	1.23029	3.7892e-11	-0.557996	0.00504969	0.672265	0.000803534
Arhgef1	-0.365067	2.35784e-06	-0.0673786	0.539293	-0.432444	3.26524e-08
Arhgef10	0.142236	0.148208	-0.27017	0.00949676	-0.127934	0.220571
Arhgef10l	-0.0056948	0.971982	0.464115	2.74912e-07	0.458418	1.67877e-07
Arhgef11	-0.419374	2.55005e-05	0.18862	0.125461	-0.23075	0.025805
Arhgef12	0.0632326	0.592964	-0.0758653	0.597052	-0.0126327	0.926199
Arhgef17	0.0795178	0.490515	-0.224141	0.0597311	-0.144623	0.192487
Arhgef18	-0.535102	0.00202796	0.0875567	0.744745	-0.447536	0.0111509
Arhgef19	0.0264903	0.812078	-0.477001	7.87687e-07	-0.450508	1.58838e-06
Arhgef2	0.818895	1.92779e-17	-0.439074	2.15502e-05	0.379821	0.000130397
Arhgef25	-0.480063	3.82985e-08	-0.239435	0.026658	-0.719492	1.94632e-15
Arhgef26	1.47094	4.32299e-11	-0.255157	0.303898	1.21564	4.97634e-07
Arhgef3	2.03855	2.48408e-24	0.309083	0.136485	2.34753	4.23965e-32
Arhgef37	2.90917	2.54476e-06	-0.197804	0.817769	2.71077	1.51704e-05
Arhgef40	-0.225283	0.00338014	-0.458992	1.40784e-08	-0.684273	3.2488e-19
Arhgef5	-0.477902	8.7922e-06	0.287414	0.0232454	-0.190483	0.0937534
Arhgef6	2.72376	4.19453e-29	-0.904725	1.0319e-05	1.81869	1.91952e-10
Arhgef7	0.434386	5.94876e-07	-0.199473	0.0445023	0.234911	0.011829
Arhgef9	0.0356362	0.899519	0.0246203	0.96695	0.0602537	0.809665
Arid1a	-0.165202	0.0380445	0.00317885	0.990323	-0.162023	0.0445243
Arid1b	0.17603	0.0474289	0.308146	0.000487096	0.484174	5.84175e-09
Arid2	0.14634	0.0774168	-0.411407	8.77131e-07	-0.265066	0.00146391
Arid3a	0.731184	0.000480431	-0.405797	0.0796265	0.325349	0.189237
Arid4a	0.212901	0.264529	-0.142571	0.5534	0.0703271	0.741591
Arid4b	0.13522	0.162463	-0.12688	0.265673	0.00833971	0.955737
Arid5a	0.394455	2.16387e-05	-0.283997	0.00538909	0.110456	0.298481
Arid5b	0.351384	2.61208e-05	-0.214413	0.0221023	0.13697	0.135827
Arih1	-0.0636913	0.458094	0.433567	1.95426e-08	0.369875	8.36021e-07
Arih2	0.210252	0.0100521	-0.0272667	0.827478	0.182984	0.0285949
Arl1	0.150248	0.0849412	0.200546	0.0288777	0.350792	2.24345e-05
Arl10	-0.333056	0.119434	0.0438155	0.904656	-0.28922	0.17883
Arl13b	-0.678614	0.000269062	0.0816957	0.790325	-0.5969	0.00148286
Arl15	0.107885	0.587015	-0.0038904	1	0.103992	0.606367
Arl16	-0.0552495	0.785742	-0.171956	0.416745	-0.227199	0.198645
Arl2	-0.798501	2.50955e-17	0.304144	0.00743861	-0.49435	2.1311e-07
Arl2bp	0.0752447	0.467723	0.336235	0.000406315	0.411477	5.04893e-06
Arl3	-0.0629514	0.610783	0.221673	0.0645096	0.15872	0.153182
Arl4a	1.10047	3.93414e-09	0.380604	0.0574138	1.48103	7.75965e-16
Arl4c	-1.5421	1.20308e-92	0.336638	0.000279985	-1.20546	5.20599e-57
Arl5a	0.752478	6.11611e-23	0.0228359	0.851715	0.77531	8.45546e-24
Arl5b	0.498306	0.0102268	-0.0381242	0.910478	0.460166	0.0219335
Arl6	-0.318661	0.0586255	-0.205309	0.358821	-0.52395	0.00261026
Arl6ip1	-1.08432	3.49384e-43	-0.0138145	0.935326	-1.09813	2.216e-42
Arl6ip4	0.0813842	0.455907	-0.00215553	1	0.0792277	0.486094
Arl6ip5	1.37283	2.18151e-45	0.210255	0.0630322	1.58309	1.74798e-59
Arl6ip6	-0.153697	0.183473	0.0262908	0.899823	-0.127404	0.298481
Arl8a	-0.588061	1.82667e-13	0.184962	0.0589965	-0.403097	7.59587e-07
Arl8b	0.249876	0.00182094	0.0673214	0.523921	0.317196	7.14313e-05
Armc1	0.192244	0.0415111	0.0356484	0.800238	0.22789	0.0160904
Armc10	-0.795068	5.21973e-06	-0.117074	0.669663	-0.912122	3.01814e-07
Armc5	-0.294584	0.0071846	-0.217532	0.107729	-0.512108	4.51475e-06
Armc6	0.269296	0.0170668	-0.0518405	0.760897	0.217451	0.0682031
Armc7	-0.530349	0.00821848	0.235772	0.402155	-0.294553	0.172409
Armc8	0.651884	4.55293e-11	-0.072777	0.587525	0.579098	1.71529e-08
Armc9	0.282188	0.0854927	-0.284013	0.132321	-0.0018282	1
Armcx1	1.20538	9.10782e-30	-0.502538	2.35698e-06	0.70282	1.79419e-09
Armcx2	0.519467	4.46063e-12	-0.361791	5.76011e-06	0.157675	0.0561111
Armcx3	1.26561	5.79698e-61	-0.0266852	0.819631	1.23892	5.3525e-57
Armcx4	2.18336	3.14772e-117	-0.311245	0.000430842	1.87208	4.57668e-80
Armcx5	-0.0711594	0.764171	-0.28195	0.229756	-0.353101	0.0813864
Armcx6	1.2702	1.64853e-14	0.0603837	0.799396	1.33052	2.35939e-15
Arnt	0.710808	3.64655e-18	0.0515175	0.652872	0.76232	2.58819e-20
Arnt2	0.154837	0.549354	-0.627863	0.0115873	-0.473	0.0512834
Arntl	-0.186193	0.326494	-0.196379	0.396073	-0.382565	0.0362156
Arpc1a	-0.684551	1.75755e-15	0.0696273	0.600133	-0.614917	2.62449e-12
Arpc1b	-1.19561	2.13868e-34	0.290735	0.00999135	-0.904876	2.59073e-20
Arpc2	-0.274298	0.0072656	-0.00183657	0.998909	-0.276134	0.00693125
Arpc3	-0.182967	0.0296174	0.0980261	0.352419	-0.0849406	0.345926
Arpc4	-0.24811	0.000982177	-0.322592	7.81564e-05	-0.570701	2.4441e-14
Arpc5	-0.800104	1.77294e-26	-0.0611513	0.596899	-0.861251	2.49254e-29
Arpc5l	-0.24359	0.0101833	0.418539	1.27455e-05	0.174949	0.065572
Arpp19	-0.44958	1.26081e-08	-0.151905	0.129573	-0.601482	7.30657e-14
Arpp21	3.69285	1.68289e-258	-0.424868	2.39246e-07	3.2679	2.15188e-185
Arrb1	-0.767906	5.20133e-07	-0.178152	0.447749	-0.946026	2.85933e-09
Arrb2	0.211334	0.212101	-0.126411	0.556096	0.0849185	0.664091
Arrdc2	0.632614	0.307591	0.193316	0.833486	0.825852	0.16558
Arrdc3	-1.10937	1.38226e-09	1.72474	8.44013e-22	0.61537	0.00033981
Arsa	-0.364344	0.000459654	-0.0852288	0.577507	-0.449566	2.74847e-05
Arsb	0.0847349	0.667111	-0.551129	0.00394266	-0.466388	0.00948356
Arsj	-0.652068	4.44567e-05	0.286295	0.154631	-0.365757	0.0248757
Arsk	-0.88111	1.16747e-06	0.422875	0.0629335	-0.458203	0.0125626
Art1	4.00497	6.6949e-54	0.974972	2.51558e-08	4.9794	1.7024e-90
Artn	0.864639	2.868e-05	-0.560938	0.0126593	0.303659	0.229937
Arv1	0.0536662	0.947164	-0.349488	0.671695	-0.295803	0.669773
Arvcf	-0.284583	0.081889	0.150002	0.488888	-0.134575	0.435993
Arx	1.89273	7.75513e-14	2.01063	7.01686e-39	3.90303	8.53817e-86
As3mt	0.626418	0.00678963	0.113222	0.732887	0.739571	0.00160962
Asah1	0.287106	0.000160541	-0.202765	0.0166823	0.0843397	0.319381
Asah2	0.306679	0.137955	-0.226631	0.373981	0.0800383	0.738575
Asap1	-1.17383	8.57017e-56	-0.246096	0.0103078	-1.41992	4.13183e-76
Asap2	-0.649309	7.14878e-05	-0.00949637	1	-0.658778	0.000102722
Asap3	-0.225061	0.209727	-0.0895966	0.729384	-0.314645	0.0784568
Asb1	0.356281	0.000948852	-0.104001	0.454903	0.252274	0.0285119
Asb13	-0.485422	0.0363823	0.76244	0.000870864	0.27702	0.218687
Asb2	4.66847	3.01613e-227	-0.244822	0.0123042	4.42337	1.20003e-187
Asb3	0.112097	0.577835	-0.125069	0.612219	-0.012973	0.968284
Asb5	0.74294	1.92228e-13	-0.0448863	0.769193	0.698051	6.66944e-12
Asb6	-0.375377	0.000104212	-0.0492473	0.754627	-0.424619	1.93313e-05
Asb7	0.166444	0.396045	-0.00306767	1	0.163373	0.411226
Asb8	0.171657	0.0591243	0.0381645	0.772665	0.20982	0.0209824
Ascc1	-0.448954	0.0163464	-0.296953	0.205113	-0.745888	7.75176e-05
Ascc2	-0.11767	0.203626	-0.0533596	0.674902	-0.171029	0.06294
Ascc3	0.231619	0.0102988	0.0531667	0.670863	0.284783	0.00162658
Asf1a	0.0628611	0.785451	0.186148	0.436882	0.249004	0.207719
Asf1b	0.190915	0.343357	0.0427051	0.886434	0.233614	0.244873
Ash1l	0.382563	9.76273e-07	-0.329328	8.09487e-05	0.0532338	0.568238
Ash2l	-0.10902	0.21318	-0.146494	0.140994	-0.255513	0.00259487
Asl	0.301462	0.00733471	0.262591	0.0249573	0.564044	1.90913e-07
Asna1	-0.157016	0.0768144	0.0872315	0.438341	-0.0697838	0.466503
Asns	0.00472822	0.974629	-0.458784	1.62474e-05	-0.454055	7.10477e-06
Asnsd1	-0.381627	5.05353e-06	0.285078	0.0020355	-0.0965483	0.289993
Aspa	1.73993	1.55368e-17	0.689604	2.3839e-05	2.42937	2.08381e-37
Asph	0.774287	8.39748e-25	-0.00893591	0.949518	0.765347	1.04252e-23
Aspm	-0.560985	0.0016074	0.0772539	0.787284	-0.48372	0.0076956
Aspscr1	-0.582786	3.92372e-11	0.173409	0.124965	-0.409373	5.79512e-06
Asrgl1	0.315996	0.127122	0.289063	0.196332	0.605027	0.00193328
Ass1	-2.60726	6.77998e-189	0.396998	0.00119223	-2.21024	2.04852e-140
Aste1	-0.107049	0.899281	0.281294	0.733109	0.174238	0.793919
Asxl1	0.270647	0.00128101	0.0963123	0.356667	0.366957	1.08854e-05
Asxl2	0.540303	1.21137e-09	-0.0305697	0.826315	0.509728	2.32414e-08
Atad1	-0.0576036	0.520287	0.216308	0.013205	0.158704	0.0533107
Atad2	-0.598922	3.36138e-15	-0.576884	2.10541e-11	-1.1758	4.31845e-50
Atad2b	0.956217	2.28014e-20	-0.0948636	0.46824	0.861337	1.05235e-15
Atad3a	0.0478134	0.636674	-0.129114	0.232093	-0.0813	0.411195
Atad5	-0.0279553	0.899363	-0.448953	0.019645	-0.476893	0.00664112
Atat1	0.748248	4.77279e-05	-0.341576	0.10974	0.406656	0.0398658
Ate1	0.424059	2.89217e-07	-0.389387	9.16481e-06	0.0346704	0.741603
Atf1	-0.350101	3.34121e-05	0.221047	0.0220519	-0.129053	0.152079
Atf2	-0.271412	0.00345704	-0.0811446	0.534022	-0.352553	0.000190025
Atf3	0.19954	0.292777	0.287954	0.13862	0.487476	0.00500572
Atf4	0.27344	0.00639464	-0.281314	0.00960984	-0.00787484	0.952952
Atf5	-0.952024	9.37385e-23	0.151486	0.217177	-0.800537	1.96271e-16
Atf6	1.46665	4.73671e-48	-0.327055	0.00300415	1.13959	4.71281e-29
Atf6b	-0.163217	0.0694495	-0.174883	0.0930531	-0.338098	0.000143209
Atf7	0.201315	0.0731586	-0.321014	0.0079216	-0.119698	0.349055
Atf7ip	0.227014	0.0286716	0.041698	0.781113	0.268708	0.0100248
Atg10	-0.475348	0.0289161	0.556175	0.0174529	0.0808354	0.752163
Atg12	0.146903	0.0933942	0.0128008	0.932268	0.159703	0.0702408
Atg13	-0.152175	0.11299	0.257508	0.0102156	0.105333	0.285478
Atg14	-0.76361	1.97104e-06	0.107134	0.690876	-0.656449	6.22302e-05
Atg16l1	0.246368	0.0150452	0.119448	0.325308	0.365812	0.000253098
Atg16l2	0.225466	0.266059	-0.426764	0.0541971	-0.201294	0.373481
Atg2a	-0.090851	0.389316	0.139824	0.232711	0.0489725	0.664505
Atg2b	0.537736	1.33367e-09	-0.0377006	0.780807	0.500031	4.29049e-08
Atg3	-0.0714501	0.519478	0.0472072	0.746983	-0.0242424	0.838801
Atg4a	0.896873	1.06001e-06	0.438838	0.0228519	1.33568	8.83093e-14
Atg4b	-0.365888	7.75171e-05	-0.0937595	0.477199	-0.459643	1.29405e-06
Atg4c	-0.276112	0.16516	-0.114835	0.684501	-0.390935	0.0483695
Atg4d	0.0572568	0.664662	0.348914	0.00202795	0.406166	0.000147765
Atg5	-0.245843	0.0219125	0.143385	0.277301	-0.102457	0.371882
Atg7	-0.525091	0.00291659	0.00817689	0.988803	-0.516904	0.00367672
Atg9a	0.81728	1.5071e-21	0.336844	9.54063e-05	1.15412	8.38014e-42
Atg9b	2.34394	1.71292e-40	-0.199882	0.270236	2.14392	1.50707e-31
Athl1	-0.123469	0.549591	-0.130902	0.610405	-0.254366	0.194776
Atic	-0.668183	2.29248e-19	0.0256984	0.840562	-0.642482	1.54155e-17
Atl2	0.604897	1.60744e-11	0.33808	0.000182057	0.942969	7.89362e-27
Atl3	-0.860594	4.94259e-33	0.104288	0.285743	-0.756304	2.53175e-25
Atm	-0.299972	0.00163414	-0.411689	0.000153099	-0.711654	5.45958e-13
Atmin	0.0429354	0.853052	0.427672	0.0266113	0.470601	0.00800509
Atn1	-0.732472	3.02923e-13	0.149962	0.243142	-0.582509	8.94384e-09
Atox1	-0.740884	2.11114e-12	0.199739	0.153659	-0.541135	4.52951e-07
Atp10a	0.802034	3.36669e-05	0.0334909	0.929631	0.835471	2.3319e-05
Atp10d	0.43284	0.00965559	-0.355477	0.0568824	0.0773543	0.729401
Atp11a	0.0981389	0.269814	-0.0967205	0.360553	0.00141821	0.999988
Atp11b	0.536009	8.88778e-09	0.170377	0.105715	0.706379	3.03664e-14
Atp11c	-0.691175	7.45016e-05	0.162108	0.49931	-0.529055	0.00294195
Atp13a1	-0.206966	0.019136	0.0999225	0.373522	-0.107042	0.253378
Atp13a2	-0.625304	1.09059e-09	0.294806	0.0156164	-0.330491	0.00174752
Atp13a3	1.10245	3.52542e-30	0.153714	0.196162	1.25617	1.29911e-38
Atp1a1	0.861651	3.11378e-19	-0.360921	0.000597175	0.500729	3.06978e-07
Atp1a2	5.00567	0	0.612494	5.43633e-17	5.61799	0
Atp1a3	3.08749	2.18121e-23	1.53103	3.70262e-20	4.61768	9.7134e-75
Atp1b1	1.72444	1.25876e-52	-0.190639	0.102522	1.53376	1.60584e-38
Atp1b3	0.401894	7.15317e-08	-0.196778	0.0191541	0.205115	0.00932285
Atp2a1	5.5058	0	0.841592	3.79929e-18	6.34737	0
Atp2a2	1.25271	5.36445e-39	0.529576	1.34836e-07	1.78228	3.59761e-76
Atp2a3	-0.562185	0.00234343	0.34468	0.141963	-0.217487	0.283788
Atp2b1	0.497344	8.96731e-07	0.156901	0.200273	0.654244	6.69816e-11
Atp2b4	2.77177	1.97997e-136	-0.20516	0.0837064	2.56659	5.07015e-116
Atp2c1	0.300697	0.000114999	-0.463688	9.48725e-09	-0.162992	0.053972
Atp5a1	0.809398	2.14633e-17	-0.0110877	0.949128	0.79831	6.04508e-17
Atp5b	0.679998	1.00191e-12	0.0856287	0.508501	0.765626	8.26268e-16
Atp5c1	0.526036	1.88064e-07	0.254711	0.0242712	0.780745	4.43247e-15
Atp5d	0.450516	1.04219e-05	0.211048	0.0719275	0.661562	4.89868e-11
Atp5e	0.174329	0.0533097	0.286735	0.00154217	0.461061	5.24106e-08
Atp5f1	0.817689	1.05437e-16	0.338302	0.00162582	1.15599	3.78413e-32
Atp5g1	0.870195	3.43381e-31	0.310729	6.04995e-05	1.18092	2.95818e-57
Atp5g2	0.269901	0.00915243	0.118004	0.358821	0.387904	0.000134053
Atp5g3	1.12576	1.11365e-30	0.276078	0.0117596	1.40183	1.26311e-46
Atp5h	0.592534	9.21126e-09	0.11764	0.372979	0.710171	4.68182e-12
Atp5j	0.304253	6.20393e-05	0.301554	0.000119777	0.605805	1.80853e-16
Atp5j2	0.279636	0.000543506	0.363029	7.24283e-06	0.642662	9.05169e-17
Atp5k	0.769936	1.90263e-16	0.29116	0.00219016	1.06108	1.61351e-30
Atp5l	0.532114	2.07128e-12	0.186172	0.0270883	0.718283	1.09948e-21
Atp5o	0.700009	4.17003e-12	0.138606	0.271528	0.838612	7.8051e-17
Atp5sl	-0.377245	0.0396267	0.151346	0.552297	-0.225885	0.238634
Atp6ap1	0.0376607	0.761806	0.144612	0.257314	0.182273	0.0928895
Atp6ap2	0.204436	0.012377	0.219487	0.011014	0.423921	6.69539e-08
Atp6v0a1	0.413204	1.11411e-06	0.376494	9.13091e-06	0.789693	4.08006e-22
Atp6v0a2	0.223441	0.0269585	0.342989	0.00060431	0.566425	2.6784e-09
Atp6v0b	0.15506	0.0560447	0.3353	2.70154e-05	0.490358	9.39006e-11
Atp6v0cchr17-	-0.0916422	0.416705	0.131865	0.302825	0.0402227	0.73647
Atp6v0d1	-0.242856	0.00509292	0.0790737	0.497832	-0.163781	0.0688556
Atp6v0e	-0.412359	4.35861e-07	0.182876	0.0603205	-0.229482	0.00661291
Atp6v0e2	-1.10368	2.62885e-06	1.74655	1.95811e-15	0.64289	0.000969106
Atp6v1a	0.140931	0.0769089	-0.302883	0.000218413	-0.161952	0.0461617
Atp6v1b2	-0.021808	0.832292	0.0889288	0.40509	0.0671206	0.469659
Atp6v1c1	-0.166732	0.0506737	0.0811684	0.459503	-0.0855626	0.34673
Atp6v1d	0.692477	1.13075e-16	0.353838	2.66016e-05	1.04631	1.07842e-37
Atp6v1e1	0.679465	1.94208e-18	0.540078	6.7202e-13	1.21954	1.87736e-59
Atp6v1f	-0.577634	1.27132e-10	0.211317	0.0556561	-0.366313	6.67612e-05
Atp6v1g1	-0.240202	0.0216569	0.178626	0.13956	-0.0615762	0.593765
Atp6v1h	-0.320923	0.000204288	0.303364	0.00118554	-0.0175576	0.872203
Atp7a	1.20385	1.71743e-37	-0.451125	1.75003e-06	0.752715	1.02636e-13
Atp8b2	-0.664855	4.9419e-17	0.199543	0.0393494	-0.465308	7.85269e-09
Atp9a	5.61018	3.3819e-78	0.197419	0.367829	5.80624	1.25895e-84
Atp9b	-0.122296	0.177112	-0.187936	0.062873	-0.31023	0.000429184
Atpaf1	-0.285773	0.120708	0.016473	0.962315	-0.269294	0.151597
Atpaf2	0.194683	0.0846371	0.00172202	1	0.196402	0.0879459
Atpase6	0.512766	8.73773e-08	-0.0280102	0.853933	0.484756	4.34506e-07
Atpbd4	-0.282603	0.007565	-0.292447	0.0196507	-0.575042	9.99582e-08
Atpif1	-0.55453	4.40577e-11	0.0269464	0.857052	-0.527579	8.34924e-10
Atr	-0.0265071	0.911274	-0.266658	0.209339	-0.293161	0.112598
Atrip	-0.293805	0.125857	0.0897134	0.756125	-0.204086	0.30314
Atrn	-0.276128	0.00146934	0.0817673	0.487135	-0.194359	0.0305291
Atrnl1	0.120216	0.230653	-0.307557	0.00304118	-0.18734	0.0659753
Atrx	0.425886	5.98866e-09	-0.48068	2.55181e-10	-0.0547946	0.528988
Atxn1	1.0465	1.27e-26	-0.202824	0.0603205	0.843663	2.58033e-16
Atxn10	0.328567	0.00178084	0.191043	0.114551	0.519608	4.38539e-07
Atxn1l	-0.0756108	0.443949	-0.2074	0.0459613	-0.283009	0.00223133
Atxn2	0.591714	4.06465e-14	-0.0107122	0.940429	0.580998	2.61796e-13
Atxn2l	0.161241	0.133948	-0.31141	0.00535633	-0.150168	0.168555
Atxn3	0.00155727	1	-0.0097405	0.985295	-0.00818313	0.982322
Atxn7	-0.064124	0.744647	-0.10516	0.654704	-0.16928	0.343893
Atxn7l1	-0.399357	0.0150574	-0.0535739	0.858894	-0.452914	0.00654477
Atxn7l2	-0.811895	7.22584e-05	0.2457	0.414905	-0.566148	0.00630087
Atxn7l3	0.0376316	0.676393	-0.202308	0.0202992	-0.164676	0.0433207
Atxn7l3b	-0.10084	0.220105	-0.394491	1.56934e-06	-0.49533	1.91152e-10
AU019823	0.203676	0.297092	0.0249442	0.937	0.228615	0.238372
AU022252	-0.0092271	0.984449	0.220267	0.254132	0.211036	0.208182
AU040320	0.60136	2.82451e-14	-0.21017	0.0180406	0.391187	2.33745e-06
Auh	-0.183945	0.376065	-0.018681	0.971147	-0.20262	0.336793
Aup1	-0.244734	0.00246634	0.238549	0.00677491	-0.00618432	0.95876
Aurka	-0.854263	1.89472e-06	0.0958369	0.743556	-0.758405	3.18057e-05
Aurkaip1	0.0234455	0.840444	-0.0735336	0.562817	-0.0500878	0.648465
Aurkb	-0.590203	0.000837171	-0.183073	0.452888	-0.77326	1.54234e-05
Auts2	0.417009	0.0218196	-0.913666	1.53077e-06	-0.496649	0.0101345
AV051173	-0.206795	0.254181	-0.170898	0.472571	-0.377678	0.0389024
Aven	0.144579	0.446737	0.011784	0.990323	0.156356	0.416711
Avil	-4.01039	1.35467e-82	3.04841	6.75945e-37	-0.961813	8.83386e-11
Avl9	-0.547073	0.00247202	-0.0065807	1	-0.55364	0.00240376
Avpi1	-1.11546	1.297e-35	0.409532	0.000112205	-0.705919	2.25359e-15
AW146020	0.10251	0.618211	-0.287453	0.188981	-0.184938	0.37801
AW209491	-0.0531068	0.826301	0.0774956	0.788785	0.0243888	0.942333
AW549877	-0.148251	0.0887789	-0.2391	0.0122272	-0.387349	5.52839e-06
AW554918	-0.74768	7.26024e-06	0.00941634	1	-0.73823	1.8355e-05
AW555464	-1.75316	6.2513e-112	0.507455	6.69491e-08	-1.2457	5.19126e-58
Axin1	-0.365855	5.01505e-05	0.13058	0.26056	-0.235272	0.0118552
Axin2	2.46734	8.93778e-05	0.461584	0.538514	2.9283	2.91815e-06
Axl	-1.23403	1.78057e-37	0.0152592	0.929631	-1.21877	2.23568e-36
AY074887	0.17188	0.399463	-0.210289	0.386057	-0.0384103	0.886497
Azi1	-0.240063	0.225884	0.0858905	0.757501	-0.154168	0.45077
Azi2	0.226891	0.014871	0.0162829	0.920433	0.243172	0.00994291
Azin1	0.324895	0.0015186	-0.462474	1.44972e-05	-0.137579	0.209422
B230118H07Rik	-0.0463237	0.85248	0.285937	0.205255	0.23961	0.243277
B230120H23Rik	-0.100539	0.37841	0.018505	0.918646	-0.0820332	0.480292
B230206F22Rik	0.385384	0.0477163	-0.599093	0.00529003	-0.213706	0.364046
B230219D22Rik	-0.00138151	0.9978	-0.107013	0.422812	-0.108394	0.334257
B230312A22Rik	1.2565	3.12537e-54	-0.666948	2.78216e-16	0.589543	4.33676e-11
B230354K17Rik	0.00960299	0.977668	-0.051492	0.876082	-0.0418883	0.871214
B2m	-0.368087	0.000415852	0.143627	0.268622	-0.22446	0.0364575
B3galnt1	-0.263381	0.19736	0.500684	0.0136857	0.2373	0.224547
B3galnt2	-0.367597	3.94301e-05	0.337043	0.000494492	-0.0305532	0.778079
B3galt5	4.20373	5.20488e-54	0.501433	0.0101098	4.7045	7.42766e-71
B3galt6	-0.33648	0.0535434	-0.594426	0.00403709	-0.930867	4.25186e-07
B3galtl	-0.786652	2.45128e-07	0.128175	0.586663	-0.658454	1.99572e-05
B3gat2	-0.374905	0.0509682	0.0255595	0.959191	-0.349335	0.0745305
B3gat3	-0.182378	0.0699665	0.327944	0.00132262	0.145566	0.147557
B3gnt1	0.0957071	0.299361	0.255463	0.00475481	0.351168	2.86772e-05
B3gnt2	-0.217855	0.0172928	0.365876	8.91865e-05	0.148021	0.110327
B3gnt8	-0.281339	0.0115222	0.292087	0.0171121	0.0107496	0.946707
B3gnt9-ps	-6.69936e-05	1	0.346178	0.112333	0.346104	0.0776237
B3gntl1	0.62019	0.000105429	-0.141592	0.494077	0.478576	0.00498409
B430319G15Rik	0.878996	1.24395e-06	-0.239345	0.268004	0.639609	0.00101379
B4galnt1	-1.68499	2.46677e-20	0.507643	0.0255386	-1.17731	5.68305e-11
B4galt1	-0.334268	8.4561e-06	-0.0036967	0.986415	-0.337964	8.67593e-06
B4galt2	-0.0384239	0.7194	-0.289551	0.00400606	-0.327973	0.000449704
B4galt3	0.0716582	0.730689	-0.402097	0.0470709	-0.330435	0.0755532
B4galt4	1.12515	5.65069e-11	-0.693994	8.55725e-05	0.431115	0.0316033
B4galt5	1.16599	5.77046e-54	0.0354085	0.747999	1.2014	2.81618e-56
B4galt6	0.570531	4.89245e-12	0.280284	0.00114031	0.85081	8.94156e-26
B4galt7	-0.32861	0.00243397	0.231362	0.0692174	-0.0972451	0.412687
B630005N14Rik	0.649697	2.91407e-09	0.117257	0.382286	0.766939	3.10281e-12
B930041F14Rik	-1.1961	2.9766e-13	0.652322	0.000772668	-0.543749	0.000846084
B9d1	-1.00081	2.53515e-09	-0.479743	0.0477559	-1.48048	6.7613e-16
B9d2	-0.12237	0.540962	-0.023724	0.965891	-0.146087	0.48728
Baalc	-0.292706	0.0622476	-0.499231	0.00600054	-0.791915	9.19472e-07
Baat1	0.368455	0.0455463	0.386239	0.0460793	0.754681	1.54636e-05
Bace1	-0.0268185	0.804419	0.246959	0.00905713	0.220139	0.0130532
Bach1	0.643077	1.91464e-13	-0.097807	0.380941	0.545264	1.84794e-09
Bad	-0.543321	0.00195925	0.236984	0.284144	-0.30633	0.0926934
Bag1	0.526372	2.75206e-07	0.388442	0.000340156	0.914811	7.72517e-20
Bag2	0.0970352	0.343094	0.0109672	0.953086	0.108001	0.295499
Bag3	0.173057	0.0375448	0.144358	0.122194	0.317414	8.11024e-05
Bag4	-0.123118	0.557763	0.0235588	0.952292	-0.0995566	0.654106
Bag5	0.299806	0.00238398	-0.353791	0.000834985	-0.0539858	0.666963
Bag6	0.110471	0.313337	0.0947591	0.475918	0.20523	0.0495324
Bahcc1	0.282053	0.00162945	-0.725325	6.70543e-15	-0.443269	4.17906e-06
Bahd1	-0.0205956	0.889472	0.471182	3.6558e-06	0.450582	4.73891e-06
Baiap2	-1.33175	9.6928e-44	-0.161875	0.284046	-1.49361	1.49407e-49
Baiap2l1	3.29657	2.00035282900369e-316	-0.675941	7.87446e-21	2.6206	1.33104e-186
Bak1	0.362475	1.96542e-05	-0.0869143	0.429247	0.275559	0.00180486
Banf1	-0.371347	1.56093e-06	0.126395	0.190148	-0.24495	0.0020616
Banp	-0.0175481	0.942593	-0.165654	0.479505	-0.183199	0.355473
Bap1	-0.0736569	0.433234	0.0892411	0.417781	0.0155843	0.886048
Bard1	-0.806806	1.32292e-07	-0.614084	0.00257849	-1.42084	2.62958e-17
Basp1	-1.18743	2.0538e-33	0.112123	0.404001	-1.0753	1.70455e-27
Bax	-1.56784	2.70756e-101	-0.157169	0.128554	-1.725	3.02168e-116
Baz1a	0.493769	7.06342e-09	-0.683297	1.322e-14	-0.189528	0.0526577
Baz1b	-0.160186	0.142748	-0.207956	0.08648	-0.368141	0.000441961
Baz2a	0.247188	0.00224236	-0.055751	0.615062	0.191436	0.021987
Baz2b	0.491463	4.5175e-07	-0.0493045	0.72726	0.442152	1.04791e-05
Bbc3	0.357304	0.0534289	-0.289631	0.177191	0.0676697	0.768209
Bbip1	0.289877	0.126939	0.0848557	0.75387	0.374725	0.0435015
Bbs1	0.249194	0.142856	-0.175951	0.407983	0.0732373	0.727368
Bbs12	-0.405139	0.0427031	0.152122	0.608022	-0.252998	0.242746
Bbs2	0.272388	0.0924982	-0.344386	0.053512	-0.0719989	0.716309
Bbs4	0.0727957	0.739848	-0.311236	0.147901	-0.238433	0.243033
Bbs5	-0.127211	0.496012	0.520119	0.0031617	0.3929	0.019568
Bbs7	0.403706	0.0285884	-0.106998	0.679109	0.29669	0.132985
Bbs9	0.251209	0.191169	-0.356064	0.100301	-0.104855	0.650942
Bbx	-0.0933033	0.271787	-0.120189	0.218526	-0.213492	0.00894237
BC002163	0.28047	0.115609	0.341713	0.0593763	0.622162	0.000201026
BC002221	0.495166	1.30013e-09	-0.321914	0.000250981	0.17325	0.0546121
BC002230	-0.184902	0.261616	-0.0338375	0.899201	-0.218733	0.194264
BC002288	-0.433001	1.07932e-05	0.110588	0.414818	-0.322408	0.00156932
BC003266	-0.551652	0.00298586	0.356391	0.107048	-0.195253	0.337112
BC003331	0.0275142	0.81965	0.0956698	0.442656	0.123183	0.232372
BC003348	0.210066	0.296717	0.00729725	1	0.217351	0.305463
[truncated: 9,394 more rows]

## Sheet: Supplemental Table 2
miRNA	Number of Targets	Confidence	Predicted mRNA Targets
mmu-let-7b-3p	17	High	TFRC, TRIM63
		Moderate	AKAP6, BCL6, CNR1, COL25A1, DCLK1, EDIL3, EDNRA, FSD1L, MYOZ2, STARD4, TCEAL7, TGFB3, TMEM182, TSPAN13, UBASH3B
mmu-let-7d-3p	3	High	KLHL31, TFRC
		Moderate	RBFOX1
mmu-let-7f-1-3p	17	High	TFRC, TRIM63
		Moderate	AKAP6, BCL6, CNR1, COL25A1, DCLK1, EDIL3, EDNRA, FSD1L, MYOZ2, STARD4, TCEAL7, TGFB3, TMEM182, TSPAN13, UBASH3B
mmu-miR-106b-3p	9	Moderate	ADORA1, CHST15, DLGAP4, FUT9, IGFBP3, MVD, RRAD, SLC16A10, SRL
mmu-miR-106b-5p	34	Experimental	MEF2D, RB1, CDKN1A, E2F2
		High	EGLN3, NTN4, PKIA, RBM24, RGMA, STK17B, VASH2
		Moderate	ARHGEF3, ATP1A2, CMKLR1, CNOT6L, CNR1, ERBB3, FAM13C, GPR63, KCNB1, KIAA0513, LDLR, LMOD3, LYPD6, ORAI1, RPS6KA5, SLC2A4, ST8SIA2, STARD4, STC1, TCEAL7, TRDN, USP28, WFS1
mmu-miR-10a-5p	20	High	HCN1, TFRC, TNNI1, TSPAN33
		Moderate	ABRA, ANK1, BCL6, DAG1, GABRB2, GJA5, IGDCC4, LSS, PRKAA2, PSTPIP2, SHISA2, SMTNL2, SYNGR1, TXLNB, UTP14C, VASH2
mmu-miR-10b-5p	20	High	HCN1, TFRC, TNNI1, TSPAN33
		Moderate	ABRA, ANK1, BCL6, DAG1, GABRB2, GJA5, IGDCC4, LSS, PRKAA2, PSTPIP2, SHISA2, SMTNL2, SYNGR1, TXLNB, UTP14C, VASH2
mmu-miR-125b-1-3p	7	High	NDRG2
		Moderate	B3GALT5, CASZ1, CDH13, DHCR24, SOX8, UNC45B
mmu-miR-128-3p	7	High	LGALS3
		Moderate	ANXA8/ANXA8L1, CITED2, CSF1, GREM1, ID3, MMD
mmu-miR-129-5p	2	Moderate	FST, REEP1
mmu-miR-130b-5p	11	High	TFRC
		Moderate	AFAP1L1, ANKRD10, ASPA, AVIL, CAV3, DIO2, IGFBP3, KCNJ2, TTN, UBASH3B
mmu-miR-133a-3p	7	High	DUSP1, FOXC2
		Moderate	ACSBG1, ANGPTL4, CTHRC1, FGF7, LPL
mmu-miR-133a-5p	5	High	NMNAT2
		Moderate	ACSBG1, GREM1, PRRG4, PTGS2
mmu-miR-133b-3p	7	High	DUSP1, FOXC2
		Moderate	ACSBG1, ANGPTL4, CTHRC1, FGF7, LPL
mmu-miR-133b-5p	0	-	-
mmu-miR-139-3p	3	Moderate	ALDH3A1, ANXA8/ANXA8L1, HSPB7
mmu-miR-139-5p	0	-	-
mmu-miR-143-5p	2	Moderate	CITED2, MMD
mmu-miR-145a-3p	0	-	-
mmu-miR-146a-5p	12	High	DTNA
		Moderate	AFAP1L2, ALOX5AP, CTXN3, GPX3, LDB3, NEB, OGN, PHYHIPL, SORT1, STC1, TMEM120B
mmu-miR-146b-5p	9	High	DTNA
		Moderate	CTXN3, LDB3, NEB, OGN, PHYHIPL, SORT1, STC1, TMEM120B
mmu-miR-148a-3p	4	High	MMD
		Moderate	CSF1, GPRC5A, PRRG4
mmu-miR-149-5p	6	High	CSF1, ID3
		Moderate	ANXA8/ANXA8L1, LPL, SLC19A2, SLC48A1
mmu-miR-151-5p	3	Moderate	FOSL1, NMNAT2, TM4SF1
mmu-miR-152-3p	1	High	NPTX1
mmu-miR-152-5p	0	-	-
mmu-miR-155-5p	21	Experimental	CYP51A1, MSI2, TM6SF1
		High	ACTA1, DYNC1I1, GATM, PTN
		Moderate	CD36, CHRNG, DUSP14, E2F2, FUT9, GJA5, HMGCS1, IGF2, MEF2A, MYOZ2, OGN, PKIA, SCN7A, TFRC
mmu-miR-16-2-3p	0	-	-
mmu-miR-181a-2-3p	0	-	-
mmu-miR-1843a-5p	3	Moderate	FGF7, NMNAT2, TNFSF15
mmu-miR-1843b-3p	0	-	-
mmu-miR-1843b-5p	0	-	-
mmu-miR-188-5p	4	High	GREM1, RGS20, SRXN1
		Moderate	TM4SF1
mmu-miR-1946a	0	-	-
mmu-miR-195a-3p	7	High	FUT9, KLHL8, MYL1
		Moderate	CNR1, EDIL3, OGN, USP13
mmu-miR-196a-2-3p	0	-	-
mmu-miR-199a-3p	7	Experimental	PTGS2
		High	FGF7, GREM1
		Moderate	CITED2, CYP1B1, EPHA1, WNT9A
mmu-miR-199b-3p	7	Experimental	PTGS2
		High	FGF7, GREM1
		Moderate	CITED2, CYP1B1, EPHA1, WNT9A
mmu-miR-199b-5p	2	High	GPRC5A
		Moderate	FOXC2
mmu-miR-1a-3p	6	Experimental	SRXN1, BDNF, MMD, TIMP3
		High	CITED2
		Moderate	SYN3
mmu-miR-200a-3p	26	Experimental	STAT5B, TGFB2
		High	PHYHIPL, PPM1E, TMEM170B, UGT1A3, UGT1A4, UGT1A6, UGT1A8 (includes others)
		Moderate	ACTA1, BHLHE40, CNR1, FST, GPRC5C, GRAMD1B, HCN1, HMGCS1, KCNJ2, LYPD6, PFKM, ST3GAL5, TFRC, TNFAIP3, UBASH3B
mmu-miR-200b-3p	21	High	DNAJB5, FSD1L, VASH2
		Moderate	ABRA, AMACR, ARHGEF3, CNOT6L, EDNRA, GPR146, LMO7, LYPD6, MBOAT2, PKIA, SCD, SLC16A2, SMPX, ST3GAL5, TEKT5, TMEM170B, TMEM229B, TSPAN13
mmu-miR-206-3p	6	Experimental	SRXN1, BDNF, MMD, TIMP3
		High	CITED2
		Moderate	SYN3
mmu-miR-210-3p	3	High	NMNAT2
		Moderate	CSF1, EPHA2
mmu-miR-214-5p	4	Moderate	ACSBG1, CCND1, TM4SF1, TNFSF15
mmu-miR-21a-3p	0	-	-
mmu-miR-221-5p	57	High	ANXA11, CAMK2A, CHRNA1, CLDN2, DBNDD1, DPEP1, GPRC5C, LDLR, LYNX1, MYZAP, RGMA, SMTNL2, TMEM38A
		Moderate	ADAMTS16, ANK1, ANKRD23, ARHGEF3, ARHGEF37, BMF, CAMK1G, CCDC88C, CHRND, CMKLR1, CNR1, COBL, CSDC2, DHCR7, E2F2, EDNRA, FADS2, FNDC5, GYS1, HMGCS1, IDI1, IP6K3, KCNB1, KLHL8, KSR1, LZTS1, MMP15, NMRK2, PPP1R14C, RAB44, RBM24, SCN7A, SGCD, SLC16A2, SLC2A6, STARD4, SUSD5, TCAP, TCEAL6, TFRC, TNNI2, TRIM54, UCP2, ZFP36L1ZFP36L1
mmu-miR-222-3p	13	Experimental	BMF
		High	CPEB3, TSPAN13
		Moderate	ANKRD10, ASPA, AXIN2, CASZ1, CNR1, GABRB2, LYNX1, MYOZ2, RBM24, SCD
mmu-miR-23a-3p	0	-	-
mmu-miR-23b-3p	0	-	-
mmu-miR-24-3p	5	Moderate	CRLF1, EREG, FOSL1, NPTX1, SYT13
mmu-miR-25-5p	18	High	CORO6, TGFBI
		Moderate	ALOX5AP, ANK1, ASPA, ATP9A, BCAM, CHST15, CSDC2, DYSF, FAM78A, GYS1, KIAA0513, KLHL30, RAP1GAP2, TNNC2, TNNI1, TNNT3
mmu-miR-296-3p	3	High	FOSL1, POSTN
		Moderate	AQP5
mmu-miR-298-5p	6	High	GREM1, SRXN1
		Moderate	ALDH3A1, ANXA8/ANXA8L1, SYT13, TNFSF15
mmu-miR-29b-3p	6	High	ID1
		Moderate	ANGPTL4, EREG, ID3, LPL, TWIST2
mmu-miR-30a-3p	9	High	TTN
		Moderate	ARHGAP28, CAP2, ITGB6, PDK1, PRKAA2, RYR3, TNIK, TRIM72
mmu-miR-30b-5p	23	Experimental	BCL6, LMNB2
		High	ACTC1, COL25A1, IP6K3, PPARGC1A, PPARGC1B, RRAD
		Moderate	ADAM12, ADAM19, ASB2, CNR1, CPEB3, FAM13C, FRMPD1, GATM, HEPHL1, MYOZ2, PSTPIP2, REEP1, SAP30, TRDN, USP2
mmu-miR-30c-2-3p	41	High	CACNB1, CTXN3, HSPB7, KCNB1, TNNI1, TP53INP2
		Moderate	ALDH3B1, ARHGAP24, ATG9B, BIN1, BMF, CAMK1G, CAMK2A, CAPN6, CDH13, DAAM2, DIO2, DTX4, E2F2, FGF11, FN3K, FRMPD1, GPR146, GPX3, HSPB2, IMPA2, ITGA7, ITGB6, LYNX1, MYLPF, MYOM3, PKIA, PTGES3L, RAB3IL1, RBM24, SHISA2, SLC2A4, SMTNL2, STK17B, SUSD5, TSPAN13
mmu-miR-30c-5p	23	Experimental	BCL6, LMNB2
		High	ACTC1, COL25A1, IP6K3, PPARGC1A, PPARGC1B, RRAD
		Moderate	ADAM12, ADAM19, ASB2, CNR1, CPEB3, FAM13C, FRMPD1, GATM, HEPHL1, MYOZ2, PSTPIP2, REEP1, SAP30, TRDN, USP2
mmu-miR-3066-5p	0	-	-
mmu-miR-3068-5p	0	-	-
mmu-miR-3081-3p	0	-	-
mmu-miR-3102-5p.2-5p	0	-	-
mmu-miR-322-3p	0	-	-
mmu-miR-322-5p	15	Experimental	PTGS2, BDNF, CCND1, FGF7, HMGA1
		High	SMAD7
		Moderate	ACSBG1, ADAMTSL3, CRIM1, CSF1, EPHA1, FHL2, FOSL1, MMD, SLC19A2
mmu-miR-32-5p	13	Experimental	CDKN1A
		High	ACTC1, CPEB3
		Moderate	ADAM19, ANKRD44, CDK5R1, DMP1, FRY, GRK5, KLHL31, RASSF3, SLC24A3, VASH2
mmu-miR-328-3p	1	Moderate	SYNGR1
mmu-miR-33-5p	0	-	-
mmu-miR-335-3p	0	-	-
mmu-miR-339-5p	24	Experimental	BCL6
		High	HEYL
		Moderate	ABCC9, ANK1, C1QTNF3, CDC42EP2, CDKN1A, CHRND, CMKLR1, IGDCC4, IGFBP3, KIF24, MMP15, NEB, PSTPIP2, RAB3IL1, SHISA2, SLC26A6, SLC2A4, SLC2A6, SORBS1, SORT1, TNNI1, UNC45B
mmu-miR-340-5p	3	Moderate	ACTC1, GATM, IGFBP3
mmu-miR-344-3p	0	-	-
mmu-miR-344d-3p	3	Moderate	DIO2, TMEM170B, TMEM38B
mmu-miR-351-3p	0	-	-
mmu-miR-351-5p	5	Experimental	ID1, ID2, ID3
		Moderate	CDR2L, MCAM
mmu-miR-362-5p	1	Moderate	CYP1B1
mmu-miR-365-2-5p	13	Moderate	ALDH3B1, CDK5R1, CKM, CLDN2, DIO2, ERBB3, GPD1L, NARF, PGM5, PLXDC1, SLC24A3, TGFB3, TGFBI
mmu-miR-378a-3p	2	Moderate	TM4SF1, TNFSF15
mmu-miR-378a-5p	3	Moderate	FGF7, GREM1, PTPRN
mmu-miR-378b	3	Moderate	EREG, PRRG4, TM4SF1
mmu-miR-378c	0	-	-
mmu-miR-378d	10	High	AQP5, GREM1, ID1, SLC48A1, TIMP3
		Moderate	ACSBG1, CCND1, CSF1, PLAUR, SYT13
mmu-miR-3968	0	-	-
mmu-miR-423-3p	15	High	CACNG6, CAMK2A, DLL1, FRY, LYNX1
		Moderate	ADAMTSL1, ADRB2, BHLHE40, CAV3, IGDCC4, LSS, PKNOX2, POSTN, SLC49A3, USP2
mmu-miR-423-5p	76	High	ANKRD2, ASB2, ATG9B, BMF, CBFA2T3, CCDC134, CDKN1A, CHRND, IFFO1, IGF2, LARS2, LYNX1, MEF2D, PKIA, PLTP, PVALB, PYGM, RGMA, SCN4A, SCN7A, SLC26A6, SLC4A3, ST8SIA2, SYNGR1, TFEB, TMEM229B, TUBB6, USP2, XIRP1, ZFP36L1
		Moderate	ADAM19, ADAMTSL2, ARHGEF37, ARHGEF6, B3GALT5, CACNA1S, CACNB1, CAMK1G, CAP2, CAPN6, CMKLR1, COL1A1, DAAM2, DBNDD1, DES, DHCR24, E2F2, EPHB3, GYS1, HSPB7, JPH1, KCNB1, KLHL30, MAMSTR, MYLK4, NPTX1, OLFML2B, PDK2, PI16, PNMA8B, PRELP, RABEP2, RAP1GAP2, RYR1, SEMA6C, SLC2A4, SLC43A2, SORT1, SPSB1, STIM1, STK17B, TMEM120B, TMEM151A, TNIK, TNNT1, TP53INP2
mmu-miR-450a-5p	2	Moderate	FOXC2, TNFSF15
mmu-miR-450b-3p	1	Moderate	ACSBG1
mmu-miR-450b-5p	0	-	-
mmu-miR-466i-5p	37	High	ANO5, DES, DPEP1, FGFRL1, GABRB2, IGF2, MYLK4, PACSIN3, PDGFB, RBM24, SEMA6A, SLC26A6, TNNI1
		Moderate	ADAM12, ANK1, ASPA, CAMK1G, CBFA2T3, CDH13, CORO6, EDIL3, FGF11, IDI1, KCNJ2, KIF24, KLHL13, LMOD3, NAPB, PRELP, RAB44, SMYD1, TBX15, TGFB3, TMEM151A, TMEM170B, TNNT2, USP2
mmu-miR-483-5p	2	Moderate	CITED2, PRRG4
mmu-miR-486a-3p	14	High	PTPRN, SLC48A1
		Moderate	CCND1, CSF1, HMGA1, SMAD7, TIMP3, TNFSF15, UGT1A3, UGT1A4, UGT1A6, UGT1A8 (includes others)
mmu-miR-486a-5p	3	High	FGF7
		Moderate	ASS1, IGFBP2
mmu-miR-486b-5p	3	High	FGF7
		Moderate	ASS1, IGFBP2
mmu-miR-499-5p	0	-	-
mmu-miR-501-3p	1	Moderate	PTGS2
mmu-miR-503-5p	7	Experimental	CCND1
		Moderate	CA6, FGF7, FOSL1, HMGA1, PTPRN, SMAD7
mmu-miR-5099	0	-	-
mmu-miR-5126	0	-	-
mmu-miR-532-5p	0	-	-
mmu-miR-542-3p	3	Experimental	PTGS2
		High	SLC48A1
		Moderate	TNFSF15
mmu-miR-574-5p	0	-	-
mmu-miR-615-3p	12	High	HSPB7, MAFA
		Moderate	ADGRG1, ARHGEF37, B3GALT5, COL23A1, GALNT6, MUSTN1, RAB3IL1, SCD, SLC2A6, SYNGR1
mmu-miR-615-5p	35	High	ADORA1, ANKRD23, BMF, CDC42EP2, CORO6, GPX3, HSPB7, IGF2, ITGA7, PKNOX2, PLTP, RAP1GAP2, SPSB1, STC1, SYNGR1, TMEM38A
		Moderate	ATG9B, BHLHE40, CHST13, CHST15, DES, FADS2, FAM78A, FGF11, GADD45B, KLHL30, LYNX1, PADI2, PRKAG3, RGMA, SLC4A3, SORT1, TAS1R1, TP53INP2, WFS1
mmu-miR-6412	0	-	-
mmu-miR-671-3p	4	High	FGF11, MMP15
		Moderate	LYNX1, MB
mmu-miR-671-5p	13	High	CAPN3, DHCR24, MYOM3
		Moderate	ARX, ATP1A2, CMKLR1, CYFIP2, DDC, RGMA, SCD, SLC16A2, SORBS2, TMEM229B
mmu-miR-674-3p	0	-	-
mmu-miR-675-5p	5	Moderate	CA6, GREM1, HMGA1, NMNAT2, THBD
mmu-miR-677-5p	3	Moderate	FGF7, GREM1, MCM10
mmu-miR-6945-3p	0	-	-
mmu-miR-760-3p	3	Moderate	HSPB7, LARS2, RSPO3
mmu-miR-8103	0	-	-
mmu-miR-872-5p	0	-	-
mmu-miR-878-5p	0	-	-
mmu-miR-92a-3p	18	Experimental	CDKN1A
		High	ACTC1, CAMK2A, CPEB3, USP28
		Moderate	ADAM19, ADAMTSL1, CDC42EP2, CDK5R1, CPEB2, FRY, GRAMD1B, IMPA2, KLHL31, MEF2D, RASSF3, SLC24A3, UBASH3B
mmu-miR-92b-3p	22	Experimental	CDKN1A
		High	ACTC1, CAMK2A, CPEB3, USP28
		Moderate	ADAM19, ADAMTSL1, ANKRD44, CDC42EP2, CDK5R1, CPEB2, DMP1, FRY, GRAMD1B, GRK5, IMPA2, KLHL31, MEF2D, RASSF3, SLC24A3, UBASH3B, VASH2
mmu-miR-99b-5p	0	-	-

## Sheet: Supplemental Table 3
Functional Category	Enrichment FDR	mRNA Targets in Pathway	myomiRs Targeting Pathway
Positive regulation of developmental process	7.62097e-06	10	miR-1a-3p, miR-133a-3p, miR-133b-3p, miR-133a-5p, miR-206-3p
Response to endogenous stimulus	1.99694e-05	10	miR-1a-3p, miR-133a-3p, miR-133b-3p, miR-133a-5p, miR-206-3p
Positive regulation of multicellular organismal process	3.94837e-05	10	miR-1a-3p, miR-133a-3p, miR-133b-3p, miR-133a-5p, miR-206-3p
Regulation of anatomical structure morphogenesis	8.77375e-05	8	miR-1a-3p, miR-133a-3p, miR-133b-3p, miR-133a-5p, miR-206-3p
Regulation of animal organ morphogenesis	0.000187337	5	miR-1a-3p, miR-133a-3p, miR-133b-3p, miR-133a-5p, miR-206-3p
Negative regulation of apoptotic process	0.000289739	7	miR-1a-3p, miR-133a-3p, miR-133b-3p, miR-133a-5p, miR-206-3p
Tube development	0.000346317	7	miR-1a-3p, miR-133a-3p, miR-133b-3p, miR-133a-5p, miR-206-3p
Positive regulation of angiogenesis	0.000346317	4	miR-133a-3p, miR-133b-3p,
Positive regulation of vasculature development	0.000388856	4	miR-133a-3p, miR-133b-3p, miR-133a-5p,
Cell migration involved in sprouting angiogenesis	0.000388856	3	miR-133a-3p, miR-133b-3p, miR-133a-5p,
Negative regulation of monocyte chemotaxis	0.000397673	2	miR-133a-3p,
Regulation of cell migration	0.000806891	6	miR-1a-3p, miR-133a-3p, miR-133b-3p, miR-133a-5p, miR-206-3p
Locomotion	0.000828938	8	miR-1a-3p, miR-133a-3p, miR-133b-3p, miR-133a-5p, miR-206-3p
Tissue migration	0.000962879	4	miR-133a-3p, miR-133b-3p, miR-133a-5p,
Epithelium migration	0.000962879	4	miR-133a-3p, miR-133b-3p, miR-133a-5p,
Regulation of cell motility	0.000962879	6	miR-1a-3p, miR-133a-3p, miR-133b-3p, miR-133a-5p, miR-206-3p
Phosphorus metabolic process	0.000962879	10	miR-1a-3p, miR-133a-3p, miR-133b-3p, miR-133a-5p, miR-206-3p

## Sheet: Supplemental Table 4
	Control		CMD1 DM13 Line		CMD1 DM15 Line
	logFC	FDR	logFC	FDR	logFC	FDR
hsa-let-7a-2-3p	-1.91535	0.0755838	-2.88361	0.0034741	-0.385586	1
hsa-let-7a-3p	-0.0848049	1	-0.109474	1	0.0158212	1
hsa-let-7a-5p*	-0.248289	0.830402	-0.327132	0.700335	-0.284309	0.887606
hsa-let-7b-3p*	-0.413752	0.714694	-0.619717	0.442755	-0.265238	0.961116
hsa-let-7b-5p*	0.430341	0.621913	0.570189	0.429637	0.817196	0.33596
hsa-let-7c-3p	-0.456464	0.949605	1.43216	0.307944	-0.240545	1
hsa-let-7c-5p*	0.693802	0.417532	1.22113	0.0564851	1.28615	0.110406
hsa-let-7d-3p*	-0.286627	0.856331	-0.239448	0.908649	-0.624258	0.610447
hsa-let-7d-5p*	0.0481963	1	0.054026	1	-0.161255	1
hsa-let-7e-3p*	0.22671	0.927207	0.0760958	1	-0.148786	1
hsa-let-7e-5p*	0.0802152	1	0.201679	0.894398	0.130944	1
hsa-let-7f-1-3p*	-0.0455282	1	-0.19023	0.981287	-0.387841	0.901627
hsa-let-7f-2-3p	-0.0352585	1	0.0471662	1	-0.127289	1
hsa-let-7f-5p*	0.0548821	1	0.152734	0.949514	0.0322119	1
hsa-let-7g-3p	0.634971	0.8202	0.332137	0.984552	-0.647004	0.974994
hsa-let-7g-5p*	0.0423127	1	0.207521	0.878777	-0.36715	0.769449
hsa-let-7i-3p	-0.633194	0.58726	-0.270064	0.913846	-0.275528	1
hsa-let-7i-5p*	-0.25304	0.838101	-0.00773298	1	0.510099	0.611557
hsa-miR-100-3p	-2.65176	1.45049e-07	-3.09898	4.72952e-10	-1.03481	0.156649
hsa-miR-100-5p*	-2.05644	0.124671	-1.45669	0.29444	-0.620581	0.903007
hsa-miR-101-3p	0.653165	0.284443	0.925745	0.0584101	0.125332	1
hsa-miR-101-5p	1.71521	0.708252	0.212651	1	1.68133	0.876276
hsa-miR-103a-2-5p	-0.0283113	1	0.126764	1	-0.680957	1
hsa-miR-103a-3p	0.238073	0.830402	0.117229	0.970157	0.30344	0.840881
hsa-miR-105-5p	0.136364	1	0.00354815	1	-0.96829	0.961116
hsa-miR-106a-5p	-0.508355	0.875879	-0.522443	0.872203	-1.76884	0.358297
hsa-miR-106b-3p*	-0.284943	0.838101	-0.217135	0.911535	-0.179914	1
hsa-miR-106b-5p*	-0.735306	0.206971	-0.833135	0.10078	-0.893318	0.1633
hsa-miR-107	0.537651	0.455247	0.827202	0.131711	0.577617	0.537
hsa-miR-10a-3p	-0.869471	0.392302	-1.53349	0.075711	0.57952	0.628722
hsa-miR-10a-5p*	-0.479325	0.662463	-0.612782	0.524287	0.847927	0.449272
hsa-miR-10b-3p	1.96652	0.408455	2.16063	0.0383133	0.73189	0.650318
hsa-miR-10b-5p*	0.953119	0.171045	1.77432	0.00119531	0.720082	0.483527
hsa-miR-1180-3p	-0.425069	0.662463	-0.450578	0.651818	-0.621305	0.593693
hsa-miR-1185-1-3p	0.768217	0.384947	1.51166	0.0180446	-0.659403	0.610447
hsa-miR-1185-2-3p	0.262155	0.983896	0.595876	0.771452	-0.589916	0.889465
hsa-miR-1185-5p	0.801008	0.325988	1.91673	0.00107999	-0.0436826	1
hsa-miR-1197	0.721433	0.342278	1.10374	0.0631716	-1.12986	0.305813
hsa-miR-1226-3p	-0.504264	0.980683	0.398555	1	-0.492097	1
hsa-miR-1228-3p	0.397933	1	-0.813402	0.777687	0.302551	1
hsa-miR-1228-5p	0.509542	0.996175	-0.345191	1	-0.172754	1
hsa-miR-1246	1.09244	0.607141	0.619766	0.858614	5.22264	0.000888294
hsa-miR-1249-3p	-0.480247	1	0.985105	0.718421	-0.301696	1
hsa-miR-1254	-0.0583216	1	-0.439567	0.924883	-0.65558	1
hsa-miR-1255a	0.259018	1	-0.811011	0.864348	1.43037	0.851493
hsa-miR-1257	-1.44665	0.887562	-4.03104	0.379696	-4.29626	0.386879
hsa-miR-125a-3p*	0.367004	0.830402	0.079232	1	0.376458	0.913894
hsa-miR-125a-5p*	-0.230796	0.850332	-0.0396569	1	0.314046	0.840881
hsa-miR-125b-1-3p*	-1.09281	0.0427744	-1.21444	0.0143183	-0.0651853	1
hsa-miR-125b-2-3p*	0.368094	0.830402	1.017	0.223355	0.714769	0.621781
hsa-miR-125b-5p*	-0.700177	0.394632	-0.394932	0.703562	0.0460195	1
hsa-miR-1260a	0.522116	0.540108	0.232767	0.879661	0.183698	1
hsa-miR-1260b	0.491152	0.584756	0.168859	0.949514	0.147771	1
hsa-miR-1261	-1.03105	0.585716	0.326176	0.961388	1.39126	0.517627
hsa-miR-1262	1.86564	0.887562	0.726786	0.950808	1.3284	0.840881
hsa-miR-126-3p	1.24236	0.170261	1.40712	0.0422661	0.374548	0.975741
hsa-miR-126-5p	1.51987	0.0109086	1.38282	0.0141923	0.193131	1
hsa-miR-1268a	-1.61411	0.0336532	-1.47059	0.0377319	-1.53065	0.0998212
hsa-miR-1268b	-1.45565	0.0481836	-1.38881	0.0444199	-1.50024	0.0988076
hsa-miR-1270	-1.79055	0.58726	-0.555987	0.978063	-1.29446	1
hsa-miR-1271-5p	-1.97771	0.301546	-0.89718	0.729736	-2.23151	0.372475
hsa-miR-1273a	-0.86574	0.965981	-0.257053	1	-0.481526	1
hsa-miR-1273d	-4.31439	0.276711	-0.687315	0.968994	-2.28608	0.656593
hsa-miR-1273e	0.0616639	1	0.755359	0.843479	-0.803401	1
hsa-miR-1273f	-1.14059	0.85163	-2.65951	0.382241	-0.873914	0.892106
hsa-miR-1273g-3p	0.485917	0.843788	-0.430841	0.878777	-0.919036	0.650318
hsa-miR-1273h-5p	0.684649	1	-0.309039	1	0.208829	1
hsa-miR-127-3p	1.29317	0.0092493	2.02316	3.52299e-06	0.630346	0.449272
hsa-miR-1275	-1.07567	0.499452	-0.223545	1	-2.36096	0.110406
hsa-miR-127-5p	1.35258	0.0427744	2.04765	0.0005075	0.2903	0.961116
hsa-miR-1276	-0.743945	0.640309	-0.558467	0.890223	-1.57272	0.628722
hsa-miR-1277-5p	0.772548	0.445246	1.02605	0.216901	-0.750655	0.769449
hsa-miR-128-1-5p	-0.507596	0.8202	0.0383237	1	-1.07897	0.56588
hsa-miR-128-2-5p*	7.44313	3.50286e-07	7.86542	8.04395e-09	5.59954	0.0512657
hsa-miR-128-3p*	3.01103	2.12338e-08	4.11436	4.11617e-14	2.50296	1.61103e-05
hsa-miR-1285-3p	-0.470952	0.714694	-0.581388	0.648737	-1.57194	0.110406
hsa-miR-1285-5p	0.595192	0.856331	-0.36148	0.961388	-0.908438	0.825347
hsa-miR-1287-5p	-0.258076	0.893509	-0.0778821	1	-0.903073	0.537
hsa-miR-1290	0.337569	0.973948	1.46011	0.49193	4.98392	0.0031015
hsa-miR-1291	0.516952	1	0.489327	1	2.88201	0.40676
hsa-miR-129-2-3p	2.50971	0.392302	1.94383	0.658842	1.12832	1
hsa-miR-1292-5p	-0.944378	0.830402	-4.01104	0.0813159	-0.553278	1
hsa-miR-1294	0.0800954	1	-0.12907	1	-0.624806	0.989858
hsa-miR-129-5p*	1.31808	0.420338	0.725772	0.726232	0.884987	0.853193
hsa-miR-1296-3p	0.149201	1	1.54402	1	0.336344	1
hsa-miR-1296-5p	-0.607322	0.553502	-0.650722	0.474091	-0.744277	0.537
hsa-miR-1301-3p	-0.420446	0.856331	-0.182548	0.997169	-0.32133	1
hsa-miR-1303	-0.69337	0.778082	-1.80323	0.115008	-1.1936	0.602327
hsa-miR-1304-3p	-0.759527	0.346639	-0.27394	0.872167	-0.889389	0.358297
hsa-miR-1304-5p	-1.98033	0.246021	-0.215768	1	0.42391	1
hsa-miR-1305	-1.15531	0.515766	-0.838306	0.681566	-1.55331	0.574204
hsa-miR-1306-3p	0.485545	1	-0.60288	1	0.185163	1
hsa-miR-1306-5p	-0.889729	0.685781	-1.55934	0.304553	1.29891	0.628722
hsa-miR-1307-3p	-0.157313	0.934192	-0.159521	0.949514	-0.43409	0.732326
hsa-miR-1307-5p	-0.25063	0.902798	-0.421812	0.776023	-0.529204	0.796058
hsa-miR-130a-3p*	-0.0149965	1	0.0145416	1	0.501326	0.614051
hsa-miR-130b-3p	0.00573153	1	-0.535994	0.430104	-0.311488	0.868782
hsa-miR-130b-5p*	-0.313345	0.832623	-0.508316	0.604463	-0.667184	0.56588
hsa-miR-132-3p*	-0.187038	0.927501	0.558829	0.524287	0.408997	0.840881
hsa-miR-132-5p	-0.249231	1	-0.46153	0.933182	0.11939	1
hsa-miR-133a-3p*	8.28232	4.11739e-36	8.015	3.63802e-35	7.77372	3.99288e-31
hsa-miR-133a-5p*	6.38268	7.00298e-09	9.44328	1.08857e-13	6.13934	0.0119891
hsa-miR-133b	6.23428	2.64271e-31	5.34485	3.98121e-26	7.36039	6.70352e-26
hsa-miR-1343-3p	0.200052	1	0.26693	1	1.36054	1
hsa-miR-134-3p	0.307577	0.998935	-0.0585516	1	0.726838	0.981232
hsa-miR-134-5p	0.417149	0.649147	0.948585	0.111545	0.649148	0.52633
hsa-miR-135b-3p	-1.64203	0.755719	-3.8585	0.618842	0.124628	1
hsa-miR-135b-5p	-0.727155	0.603693	-0.905504	0.681566	-1.00824	0.912952
hsa-miR-136-3p	0.987236	0.090336	1.87054	8.68979e-05	-0.144649	1
hsa-miR-136-5p	1.32	0.11732	2.18578	0.00212658	0.273221	0.989858
hsa-miR-137	-0.837832	0.592343	-0.830881	0.640496	0.031003	1
hsa-miR-138-1-3p	-1.48798	0.225597	-0.255904	0.961388	0.909218	0.610447
hsa-miR-138-5p	-0.816597	0.239195	-1.00506	0.0860425	-0.337564	0.876276
hsa-miR-139-5p*	5.22551	0.0642063	3.01587	0.165504	4.10517	0.547406
hsa-miR-1-3p	7.48603	6.10251e-25	8.6386	1.13214e-33	8.10881	5.79236e-16
hsa-miR-140-3p*	-8.1716e-05	1	0.202023	0.878777	0.0263401	1
hsa-miR-140-5p*	-0.291968	0.887562	-0.0924563	1	0.135447	1
hsa-miR-141-3p	3.22087	0.830402	1.22827	0.911535	0.418041	1
hsa-miR-142-3p	-1.22628	0.294754	-1.72243	0.125224	-1.64407	0.263884
hsa-miR-142-5p	-1.09357	0.182585	-0.775202	0.41332	-1.33266	0.143531
hsa-miR-143-3p*	1.545	0.012878	1.63129	0.0054296	0.777117	0.449272
hsa-miR-143-5p*	1.59394	0.139883	1.90454	0.034256	1.12667	0.361319
hsa-miR-145-3p	0.680392	0.592343	1.24332	0.112692	0.0220081	1
hsa-miR-145-5p	1.41022	0.038322	1.64961	0.00697914	1.82994	0.00781963
hsa-miR-1468-5p	-0.253065	1	1.33026	0.137065	0.264742	1
hsa-miR-146a-5p*	-0.576147	0.72643	-1.66625	0.0683895	-0.285955	1
hsa-miR-146b-3p	0.145856	1	0.133836	1	1.53262	0.234384
hsa-miR-146b-5p*	0.00471918	1	0.19067	0.958334	1.99851	0.00703569
hsa-miR-147b	4.03023	0.400881	1.26916	1	0.16182	1
hsa-miR-148a-3p*	0.439575	0.612202	0.609042	0.38567	1.03214	0.143531
hsa-miR-148a-5p*	-0.0342661	1	0.0688016	1	1.48274	0.211904
hsa-miR-148b-3p*	-0.498089	0.515307	-0.455821	0.562276	-0.228463	0.961116
hsa-miR-148b-5p*	-0.161028	0.927414	-0.466853	0.552654	-0.395861	0.773805
hsa-miR-149-5p*	1.13069	0.038322	1.65562	0.0005075	0.548358	0.599507
hsa-miR-151a-3p	-0.337186	0.686484	0.0478385	1	-0.0422787	1
hsa-miR-151a-5p	-0.549826	0.408455	-0.315236	0.712126	-0.263797	0.903007
hsa-miR-151b	-0.213725	0.949605	0.130569	1	0.533935	0.783154
hsa-miR-152-3p*	-0.21351	0.887562	0.122237	1	1.13383	0.124987
hsa-miR-152-5p*	-0.29285	0.887562	-0.0884128	1	0.252516	0.990436
hsa-miR-153-3p	-0.689758	0.856331	-0.693354	0.879661	-4.30133	0.449272
hsa-miR-1538	-0.259594	1	-1.02187	0.955389	-1.7537	0.989858
hsa-miR-154-3p	0.0981495	1	0.676419	0.858614	-1.04894	0.840881
hsa-miR-154-5p	1.43054	0.038322	1.68171	0.00788562	0.764682	0.574204
hsa-miR-155-5p*	-1.87218	0.000435788	-1.80389	0.0005075	-0.996862	0.200178
hsa-miR-15a-5p	-0.972844	0.0842403	-0.607424	0.334174	-0.42748	0.702556
hsa-miR-15b-3p*	-1.33226	0.0842403	-1.20615	0.0848677	-1.53057	0.0988076
hsa-miR-15b-5p	-1.80256	0.00084417	-1.68118	0.001392	-1.01561	0.181316
hsa-miR-16-1-3p*	-0.035323	1	-1.07371	0.925736	-0.758399	1
hsa-miR-16-2-3p*	-0.935883	0.246021	-0.762896	0.340404	-0.802054	0.452469
hsa-miR-16-5p*	-1.11351	0.0358494	-1.05336	0.0358018	-0.531002	0.574204
hsa-miR-17-3p	-0.776795	0.295454	-0.223084	0.910047	-0.603849	0.599507
hsa-miR-17-5p*	-0.772634	0.179624	-0.769974	0.138179	-1.31397	0.0166681
hsa-miR-181a-2-3p*	0.0131192	1	0.251625	0.843479	0.83013	0.292807
hsa-miR-181a-3p	0.0578328	1	-0.183897	0.945685	-0.696152	0.500613
hsa-miR-181a-5p*	1.04509	0.0645336	1.234	0.0145787	1.15249	0.0937378
hsa-miR-181b-2-3p	-0.703089	0.887562	-0.269027	1	-0.5216	1
hsa-miR-181b-3p	-0.121923	1	-0.597207	0.840783	-1.45498	0.536662
hsa-miR-181b-5p*	0.395869	0.679887	0.316138	0.776023	0.596541	0.56588
hsa-miR-181c-3p	-0.0579655	1	0.0178569	1	0.0967248	1
hsa-miR-181c-5p	0.664713	0.301546	0.587653	0.369831	0.595731	0.52633
hsa-miR-181d-5p*	-0.157735	0.927207	0.319063	0.716118	0.58744	0.536662
hsa-miR-182-5p*	1.17444	0.225309	1.77398	0.0228831	-0.417665	0.920902
hsa-miR-183-5p*	0.587973	0.838101	1.30397	0.403868	-1.62394	0.56588
hsa-miR-184	3.96053	0.00277865	0.851753	0.64415	2.19186	0.509407
hsa-miR-185-3p	-1.87716	0.301546	0.456599	1	-2.43448	0.574204
hsa-miR-185-5p*	-0.629199	0.686484	-1.39098	0.149248	-0.1346	1
hsa-miR-186-5p*	-0.177641	0.887562	-0.0451421	1	0.0380446	1
hsa-miR-188-3p	3.83002	0.00283046	3.16239	0.000234	1.64871	0.696039
hsa-miR-188-5p*	3.11363	1.47239e-07	3.12705	2.73388e-08	1.39186	0.230759
hsa-miR-18a-3p	-0.805666	0.513503	-1.05149	0.289067	-0.360637	0.989858
hsa-miR-18a-5p	-1.04767	0.101953	-0.802396	0.221543	-1.1794	0.125011
hsa-miR-1908-3p	-0.286951	1	-2.01015	0.175361	-1.10321	0.769449
hsa-miR-1908-5p	0.0934176	1	-0.933659	0.48077	-0.0847034	1
hsa-miR-190a-3p	-1.68209	0.58726	0.0579154	1	-0.78919	1
hsa-miR-190a-5p	-0.620003	0.392302	-0.139771	0.973242	-0.777443	0.388632
hsa-miR-190b	0.579689	1	1.77823	0.292891	1.00891	0.991264
hsa-miR-1910-5p	-2.34822	0.0249203	-4.50506	0.000830915	-2.08584	0.0944069
hsa-miR-1913	1.57022	0.887562	-0.492856	1	-0.623562	1
hsa-miR-191-3p	-1.27305	0.252628	-0.733563	0.558053	-0.383114	0.989858
hsa-miR-191-5p*	-0.238752	0.838101	-0.225467	0.858614	0.195841	0.981232
hsa-miR-192-5p*	0.38008	0.632863	0.672768	0.231569	0.371154	0.769449
hsa-miR-193a-3p	-0.812988	0.186401	-0.874331	0.109633	-0.4916	0.628722
hsa-miR-193a-5p*	-0.420084	0.617134	-0.358831	0.697405	0.10049	1
hsa-miR-193b-3p	0.489646	0.536734	1.17705	0.0210052	1.00991	0.127336
hsa-miR-193b-5p	0.845214	0.664911	1.53892	0.21626	1.12288	0.449272
hsa-miR-194-5p	0.44004	0.753765	0.642633	0.562276	0.883362	0.537
hsa-miR-195-5p	-0.829991	0.752937	-0.808942	0.858614	0.859883	0.702556
hsa-miR-196a-3p	-0.467791	0.665544	-0.204433	0.949343	0.263944	0.946444
hsa-miR-196a-5p*	-0.542263	0.4029	-0.202495	0.878777	0.425622	0.664076
hsa-miR-196b-3p	-4.24493	0.459775	-1.87117	0.48077	1.55574	0.839045
hsa-miR-196b-5p*	-0.210149	0.877061	-0.0545882	1	0.872691	0.227631
hsa-miR-1972	-1.64736	0.547676	-1.51863	0.53291	-2.76907	0.449272
hsa-miR-1973	0.685018	0.893509	2.13949	0.382339	1.29486	0.790693
hsa-miR-197-3p	0.0720705	1	-0.298577	0.872167	0.00380568	1
hsa-miR-197-5p	-4.16436	0.408455	-0.695234	1	-1.75364	0.989858
hsa-miR-199a-3p*	0.406202	0.603693	0.791043	0.140981	1.1912	0.0512657
hsa-miR-199a-5p*	0.0443628	1	0.427072	0.668427	1.22097	0.110406
hsa-miR-199b-3p*	0.406203	0.590764	0.791065	0.125527	1.19128	0.0408823
hsa-miR-199b-5p*	0.087447	1	0.127689	1	0.801623	0.449272
hsa-miR-19a-3p*	-0.81514	0.206971	-0.570366	0.409394	-0.496188	0.644008
hsa-miR-19a-5p	0.443986	0.990535	-1.41618	0.653654	-1.3291	0.700005
hsa-miR-19b-1-5p	-0.846822	0.937848	-0.932192	0.73592	-0.339564	1
hsa-miR-19b-3p*	-0.158702	0.926983	-0.0910819	1	-0.146654	1
hsa-miR-200b-3p*	0.526337	0.989681	1.3606	0.442755	1.08363	0.90278
hsa-miR-200c-3p	-0.229472	1	-1.17169	0.681566	-0.00501365	1
hsa-miR-204-5p	-1.38265	0.090336	-0.935201	0.200379	1.67156	0.292807
hsa-miR-206	5.81954	4.64924e-16	4.73218	6.69414e-12	6.41281	2.36483e-16
hsa-miR-208b-3p	8.63191	2.03284e-09	9.08076	3.83684e-11	5.79249	0.0527447
hsa-miR-20a-3p	-0.619141	0.856331	-0.309737	1	-1.71996	0.500613
hsa-miR-20a-5p*	-0.970088	0.0642063	-0.668032	0.227734	-1.4762	0.00422125
hsa-miR-20b-5p	-5.41798	0.0698569	-0.821636	0.837535	-0.891964	1
hsa-miR-210-3p*	-0.899286	0.129229	-0.777575	0.179781	-0.311459	0.876276
hsa-miR-210-5p	-1.99894	0.0249203	-2.38276	0.00261617	-1.25695	0.358297
hsa-miR-2110	-0.287632	1	-0.404534	0.913846	-0.0229716	1
hsa-miR-2116-3p	-0.975262	0.856581	-0.84973	0.726232	-1.58214	0.732326
hsa-miR-212-3p	-0.139899	1	0.594043	0.703028	1.31507	0.348734
hsa-miR-212-5p*	-1.61031	0.239195	-0.406664	0.937953	1.66593	0.449272
hsa-miR-21-3p	-0.741356	0.294754	-0.514874	0.53291	-0.32417	0.876276
hsa-miR-214-3p*	-0.273467	0.788317	-0.455895	0.509237	0.740597	0.309422
hsa-miR-214-5p*	-0.155608	0.937848	-0.0572866	1	0.509698	0.634341
hsa-miR-215-5p	0.0360578	1	0.722585	0.777723	-0.255678	1
hsa-miR-21-5p	-0.412337	0.632019	-0.14699	0.961388	-0.0972829	1
hsa-miR-218-1-3p	-2.85538	1	-2.63298	0.369831	0.047192	1
hsa-miR-218-5p*	-1.29584	0.038322	-1.33092	0.0163754	-1.04255	0.170667
hsa-miR-219a-1-3p	0.33256	1	-0.162935	1	0.134069	1
hsa-miR-219a-5p	0.457637	1	-0.693845	1	0.185163	1
hsa-miR-219b-3p	4.25668	0.260464	1.26916	1	-0.859477	1
hsa-miR-219b-5p	-3.81409	0.58726	-0.647214	1	-1.96765	1
hsa-miR-221-3p*	-1.2323	0.0259973	-1.16774	0.0247572	-0.341318	0.840881
hsa-miR-221-5p*	-2.42638	0.000122699	-2.17859	0.0005075	-0.354533	0.90807
hsa-miR-222-3p*	-2.41664	1.41848e-06	-2.35804	1.84786e-06	-1.14403	0.110406
hsa-miR-222-5p*	-2.91472	0.00148249	-5.79989	1.20045e-09	0.776542	0.702556
hsa-miR-22-3p*	0.173626	0.893509	0.442597	0.562276	0.371102	0.769449
hsa-miR-224-3p	-0.527319	1	-1.55057	0.474091	1.35787	0.890753
hsa-miR-224-5p*	-1.58806	0.032198	-1.3259	0.0615498	-0.502114	0.802931
hsa-miR-22-5p*	-0.0123906	1	0.671574	0.403868	0.639165	0.56588
hsa-miR-2277-3p	-2.00681	0.4029	0.478769	1	1.31603	0.746477
hsa-miR-2277-5p	0.0388512	1	-0.772086	0.61982	-0.0361186	1
hsa-miR-2355-3p	-1.40079	0.547216	-0.582915	0.810929	1.07997	0.793891
hsa-miR-2355-5p	-0.870803	0.459777	-0.59072	0.656256	0.136764	1
hsa-miR-2392	2.68146	0.038322	1.53617	0.287781	2.5054	0.114728
hsa-miR-23a-3p*	-0.218624	0.880999	-0.0721041	1	0.141686	1
hsa-miR-23a-5p	-1.38152	0.0902022	-1.33393	0.0963875	-0.585425	0.732326
hsa-miR-23b-3p*	0.465445	0.592343	0.463835	0.607839	1.1402	0.110406
hsa-miR-23b-5p*	-2.97243	0.830402	-0.8893	0.913846	-0.750176	0.989858
hsa-miR-24-1-5p	-0.52256	0.875879	-0.316754	1	0.0582394	1
hsa-miR-24-2-5p*	-0.499056	0.562929	-0.61296	0.386394	-0.159725	1
hsa-miR-24-3p*	0.0169381	1	-0.00844708	1	0.275788	0.920902
hsa-miR-2467-5p	0.0702451	1	-0.646002	0.594816	-0.551487	0.804202
hsa-miR-25-3p*	-0.507832	0.443675	-0.128888	0.961388	-0.259824	0.899782
hsa-miR-25-5p*	-2.38475	0.0280409	-1.31684	0.237428	-0.640314	0.867486
hsa-miR-2682-3p	-1.46057	0.536734	-1.33322	0.550035	-1.25124	0.656593
hsa-miR-2682-5p	-0.950774	0.210283	-1.05887	0.149248	-0.23262	0.989858
hsa-miR-26a-1-3p	-1.64947	0.632863	-1.45681	0.700335	3.72524	0.270333
hsa-miR-26a-2-3p	-0.349367	0.973948	-0.589075	0.837535	-1.29306	0.536662
hsa-miR-26a-5p*	0.366278	0.644973	0.73637	0.165504	0.641058	0.425819
hsa-miR-26b-3p	-0.855807	0.343756	-0.21827	0.968994	0.120431	1
hsa-miR-26b-5p*	-0.322859	0.7023	-0.114954	0.978063	-0.141683	1
hsa-miR-27a-3p*	-0.327927	0.757937	-0.277097	0.824842	-0.167847	1
hsa-miR-27a-5p*	-1.31663	0.124832	-1.53966	0.0377078	-0.796576	0.54725
hsa-miR-27b-3p*	0.343431	0.732469	0.362843	0.700335	0.911716	0.234384
hsa-miR-27b-5p*	-0.62629	0.590764	-1.22834	0.130107	-0.976538	0.449272
hsa-miR-28-3p	-0.871315	0.101953	-0.461547	0.49987	-0.408906	0.698791
hsa-miR-28-5p	-0.816949	0.139883	-0.630938	0.271065	-0.264656	0.899782
hsa-miR-296-3p*	0.362059	0.856581	0.784325	0.441818	-0.577741	0.876276
hsa-miR-296-5p	-0.574518	0.632827	-0.456367	0.718421	0.198792	1
hsa-miR-299-3p	1.92478	0.000950161	1.6977	0.00312972	-0.325501	0.912952
hsa-miR-299-5p	3.19792	0.000378561	4.00842	4.19035e-06	1.4783	0.292807
hsa-miR-29a-3p*	-1.49207	0.010424	-1.40576	0.0121937	-0.376096	0.840881
hsa-miR-29a-5p	-1.29642	0.240715	-1.4159	0.197769	-0.71023	0.744586
hsa-miR-29b-1-5p	-2.4148	0.0107101	-3.14512	8.68979e-05	-0.873664	0.592635
hsa-miR-29b-3p*	-2.52736	0.00819579	-2.11329	0.0213304	-1.11669	0.492542
hsa-miR-29c-3p	-1.20684	0.240715	-1.13762	0.287781	-0.11514	1
hsa-miR-29c-5p	-1.92353	0.592343	-0.331992	1	0.258272	1
hsa-miR-301a-3p	0.0130273	1	-0.0752737	1	0.0377741	1
hsa-miR-301a-5p	-1.96286	0.244594	-1.23485	0.543254	0.188628	1
hsa-miR-301b-3p	0.115716	1	0.155968	0.968994	0.348357	0.876276
hsa-miR-3065-3p	-0.871757	0.862389	-0.00264976	1	-1.60571	0.989858
hsa-miR-3065-5p	-1.01794	0.893509	-1.22728	0.660389	1.5909	0.719153
hsa-miR-3074-3p	-3.4129	0.830402	0.200376	1	-1.96765	1
hsa-miR-3074-5p	0.570947	1	2.75885	0.538431	0.925371	1
hsa-miR-30a-3p*	-0.156648	0.927207	0.570963	0.382339	0.0980979	1
hsa-miR-30a-5p*	0.0948196	0.998935	0.504615	0.409394	-0.237723	0.918831
hsa-miR-30b-3p*	0.622669	0.8202	0.382552	0.966477	0.0258664	1
hsa-miR-30b-5p*	0.54628	0.407077	0.804086	0.120714	-0.243869	0.920902
hsa-miR-30c-1-3p	-0.660366	0.695489	0.1682	1	0.316648	0.999028
hsa-miR-30c-2-3p*	-0.679378	0.485563	-0.343153	0.837535	-0.520591	0.840881
hsa-miR-30c-5p*	0.181734	0.887562	0.397842	0.61982	-0.185076	0.989858
hsa-miR-30d-3p*	0.425113	0.69131	-0.0335894	1	-0.669261	0.610447
hsa-miR-30d-5p*	0.564756	0.367334	0.722201	0.158486	-0.218298	0.946856
hsa-miR-30e-3p*	0.162264	0.933309	0.482109	0.550035	-0.065407	1
hsa-miR-30e-5p*	0.187361	0.880999	0.199965	0.878777	-0.235717	0.920902
hsa-miR-3116	-2.03531	1	-1.50377	0.911535	1.09294	0.892106
hsa-miR-3117-3p	-0.630035	0.644973	-0.166566	1	-0.393455	0.946444
hsa-miR-3126-5p	-0.0686489	1	1.12542	0.837535	-3.94321	0.56588
hsa-miR-3129-3p	-1.68944	0.589118	-1.24102	0.543887	-0.117817	1
hsa-miR-3130-3p	3.89845	0.58726	-0.788645	1	0.537649	1
hsa-miR-3130-5p	-4.14522	0.446753	-0.309085	1	0.792322	1
hsa-miR-3135b	2.12684	0.116958	0.205966	1	0.64276	0.903007
hsa-miR-3138	0.186153	1	-1.13303	1	2.76726	1
hsa-miR-31-3p	-1.26085	0.21539	-1.82691	0.0275181	-1.26971	0.358297
hsa-miR-3151-3p	0.993856	0.973948	-0.147718	1	0	1
hsa-miR-3152-5p	-2.93241	0.00856446	-2.45179	0.00803006	-1.54237	0.220814
hsa-miR-3157-5p	-3.4499	0.58726	3.30892	0.826277	0.80139	1
hsa-miR-3158-3p	-1.13036	0.330523	-0.473434	0.820267	-0.827485	0.656593
hsa-miR-31-5p*	-1.35665	0.0280409	-1.33355	0.0207218	-0.826344	0.367044
hsa-miR-3173-5p	-3.4129	0.830402	0.146399	1	-2.9414	0.920902
hsa-miR-3174	0.570095	0.991882	1.16795	0.913846	-3.05134	0.920902
hsa-miR-3176	-0.748056	0.700747	-0.877199	0.60791	-2.09942	0.114728
hsa-miR-3177-3p	-1.25058	0.446753	-0.348042	0.973242	-2.11608	0.342001
hsa-miR-3177-5p	0.684728	1	-0.306839	1	-1.96765	1
hsa-miR-3180	-1.16955	0.788317	1.62636	0.771286	-3.03813	0.946444
hsa-miR-3180-3p	1.06549	0.879899	1.37332	0.60791	-3.28143	0.920902
hsa-miR-3187-3p	-0.673966	0.856581	-1.07759	0.724099	-0.783186	1
hsa-miR-3195	-0.164958	1	-1.43034	0.167685	-0.579544	0.876276
hsa-miR-3196	2.1686	0.252628	-0.708883	0.729736	0.191014	1
hsa-miR-3200-3p	-0.856093	0.352477	-0.538182	0.660389	-0.648608	0.892106
hsa-miR-320a	-0.15442	0.927207	-0.30785	0.726232	0.643352	0.449272
hsa-miR-320b	0.478234	0.705911	0.0320585	1	0.736621	0.599507
hsa-miR-320c	0.350751	1	-1.05238	0.649348	0.877883	0.825347
hsa-miR-320d	0.654375	0.875598	-0.670303	0.889938	4.90548	0.224944
hsa-miR-323a-3p	0.546274	0.485563	1.44049	0.00468837	0.0716087	1
hsa-miR-323a-5p	-4.65086	0.206971	0.741773	0.976115	-1.3124	0.773805
hsa-miR-323b-3p	-0.12103	0.998935	-0.0272465	1	-0.338179	0.903501
hsa-miR-32-3p	-2.27442	0.0657592	-1.28113	0.395468	-1.69352	0.358297
hsa-miR-324-3p	0.036846	1	0.13917	1	0.722886	0.593693
hsa-miR-324-5p	0.638872	0.494342	0.58156	0.566875	0.844823	0.528907
hsa-miR-32-5p*	-0.158027	1	-0.543246	0.716118	-0.86746	0.656593
hsa-miR-326	0.378817	0.880999	-0.375274	0.935856	-0.0664002	1
hsa-miR-328-3p*	0.0215862	1	1.01592	0.273942	0.495492	0.842771
hsa-miR-329-3p	-0.00733641	1	0.486819	0.648737	-0.0623444	1
hsa-miR-329-5p	0.311495	1	1.03521	0.911535	-1.36476	0.989858
hsa-miR-330-3p*	-1.91257	0.0267101	-0.934288	0.310657	-0.350709	0.974843
hsa-miR-330-5p*	-0.805244	0.284565	-0.981508	0.130208	-0.771278	0.449272
hsa-miR-331-3p	-0.299327	0.820241	0.212627	0.911535	0.219515	0.989858
hsa-miR-331-5p	0.129823	1	0.561601	0.681566	1.10264	0.599507
hsa-miR-335-3p*	-2.72741	2.50819e-06	-3.27162	1.24537e-08	-0.699806	0.547406
hsa-miR-335-5p	-0.403654	0.69131	-0.451969	0.649348	0.736246	0.47174
hsa-miR-337-3p	0.535369	0.664431	0.445571	0.762427	-0.730362	0.628722
hsa-miR-337-5p	0.387571	0.788317	1.49353	0.0294235	-0.0561615	1
hsa-miR-339-3p	-0.300618	0.810805	-0.0655619	1	-0.417533	0.75329
hsa-miR-339-5p*	-1.29351	0.0395027	-1.09721	0.0608382	-0.399299	0.808853
hsa-miR-33a-3p	3.13198	0.0336532	2.21103	0.093627	3.02152	0.110406
hsa-miR-33a-5p	0.658071	0.662545	0.973139	0.382339	1.07146	0.525511
hsa-miR-33b-3p	-0.000196818	1	-0.692957	0.879661	0.335067	1
hsa-miR-33b-5p	0.657286	0.708252	0.692099	0.660389	0.819166	0.702556
hsa-miR-340-3p	-0.323289	0.893509	-0.0779577	1	-0.320431	1
hsa-miR-340-5p*	-0.332262	0.726576	-0.0569526	1	-0.75689	0.365991
hsa-miR-342-3p	0.372742	0.676904	0.065544	1	0.481486	0.664076
hsa-miR-342-5p*	-0.259599	1	0.422252	0.949514	-1.1843	0.790825
hsa-miR-345-5p	-0.565078	0.42324	-0.383678	0.658842	-0.577018	0.537
hsa-miR-34a-3p	-0.994492	0.314799	-1.38954	0.130208	-0.575743	0.840881
hsa-miR-34a-5p	-0.792151	0.283152	-0.768843	0.259881	0.0327488	1
hsa-miR-34b-3p*	0.451951	0.912481	0.40954	0.949514	0.111145	1
hsa-miR-34b-5p	-0.750198	0.592343	0.509984	0.771286	0.0760744	1
hsa-miR-34c-3p	1.82193	0.494342	1.49535	0.648737	3.69834	0.112109
hsa-miR-34c-5p*	-0.188878	0.948828	-0.00545784	1	0.209959	1
hsa-miR-3605-3p	-0.481569	0.81138	-0.904649	0.343702	-0.626884	0.702556
hsa-miR-3605-5p	-0.250172	1	-0.18001	0.992922	0.198363	1
hsa-miR-3607-3p	0.483703	0.887562	0.0251842	1	-0.3065	1
hsa-miR-3609	-2.03531	1	-1.43782	0.911535	1.93384	0.64882
hsa-miR-3613-3p	0.248963	1	-0.462159	0.981287	-2.18772	0.64882
hsa-miR-3613-5p	-1.07779	0.58726	-0.470659	0.878777	-0.277625	1
hsa-miR-361-3p*	-0.090635	1	-0.142493	0.992922	0.0792571	1
hsa-miR-3615	0.961109	0.459777	1.70081	0.0821342	0.0720959	1
hsa-miR-361-5p*	-0.171108	0.927207	0.124916	0.992922	0.506426	0.644008
hsa-miR-3620-5p	1.86314	0.887562	1.59209	1	0.80139	1
hsa-miR-3622a-5p	-2.14201	1	0.208689	1	-3.05573	0.920902
hsa-miR-362-3p	2.56492	0.4029	1.41502	0.777687	-2.77783	1
hsa-miR-362-5p*	2.4584	1.90694e-05	2.42065	9.06533e-06	0.801869	0.537
hsa-miR-363-3p	0.570947	1	-1.50201	0.700335	-1.96765	1
hsa-miR-3648	2.36781	1	-1.59723	0.911535	1.10538	1
hsa-miR-3651	0.0520597	1	-1.93317	0.175361	0.576608	0.981914
hsa-miR-3653-3p	1.52593	0.856331	2.97973	0.85543	3.89623	0.751289
hsa-miR-3656	3.12573	0.189906	-1.48105	0.837535	1.02534	0.894934
hsa-miR-365a-3p	-0.278062	0.830402	-0.645359	0.334174	0.770433	0.361319
hsa-miR-365a-5p	-2.1985	0.437436	1.0802	0.708726	0.019698	1
hsa-miR-365b-3p	-0.278061	0.830402	-0.645359	0.334174	0.770437	0.361319
hsa-miR-365b-5p	-0.106234	1	-0.640384	0.708835	1.40739	0.385029
hsa-miR-3661	-1.20155	0.526046	0.661393	0.878777	-1.46186	0.610447
hsa-miR-3675-5p	-0.500707	0.947544	0	1	0.519244	1
hsa-miR-3677-3p	-1.60451	0.236156	-0.308022	1	-1.925	0.386879
hsa-miR-3679-5p	-3.81642	0.590764	-3.29024	0.0377078	-0.49062	1
hsa-miR-3687	0.640406	0.877087	-0.387019	1	1.17172	0.767703
hsa-miR-3691-5p	-1.65853	0.823256	-0.637587	0.949514	0.0835246	1
hsa-miR-369-3p	0.337914	0.753765	1.04918	0.0615498	-0.847377	0.344192
hsa-miR-369-5p	0.608457	0.352426	1.17355	0.0146283	-0.207632	0.981232
hsa-miR-370-3p	0.480256	0.584756	1.49581	0.00341018	-0.196698	0.989858
hsa-miR-370-5p	1.00776	0.354481	1.2281	0.188729	-0.140845	1
hsa-miR-374a-3p	-0.464441	0.674609	-0.352748	0.783532	-0.565783	0.696731
hsa-miR-374a-5p	-0.365474	0.728214	0.228541	0.884893	-0.134748	1
hsa-miR-374b-3p	-0.81294	0.632451	-0.546567	0.712126	-0.0824859	1
hsa-miR-374b-5p*	0.534003	0.701881	0.601793	0.64415	0.924448	0.493826
hsa-miR-375	2.1959	0.496042	3.04747	0.075711	2.36243	0.734183
hsa-miR-376a-2-5p	0.878582	0.662463	0.811895	0.73592	-0.389603	1
hsa-miR-376a-3p	1.20708	0.0430114	1.20451	0.0329857	0.0241356	1
hsa-miR-376a-5p	1.16767	0.0648803	2.00098	0.000186693	0.322763	0.920902
hsa-miR-376b-3p	0.821012	0.343756	1.54774	0.0163754	-0.769658	0.537
hsa-miR-376b-5p	1.55432	0.392302	2.36661	0.273942	0.90725	1
hsa-miR-376c-3p	0.63545	0.384692	1.52079	0.00264702	0.011902	1
hsa-miR-376c-5p	1.55363	0.392302	2.45342	0.276896	0.907304	1
hsa-miR-377-3p	0.265488	0.887562	1.39499	0.0377078	0.230645	1
hsa-miR-377-5p	0.845811	0.319938	1.43317	0.0300929	0.965168	0.364996
hsa-miR-378a-3p*	2.85897	0.00114723	3.17052	0.000186693	1.40105	0.310264
hsa-miR-378a-5p*	3.70689	0.0348578	2.69587	0.0819204	2.73773	0.492542
hsa-miR-378c*	1.75238	0.0955691	1.59429	0.110334	0.138095	1
hsa-miR-378d*	0.887444	0.793602	2.13261	0.200379	1.09362	1
hsa-miR-378i	2.13364	0.226808	2.06891	0.0403301	-0.338855	1
hsa-miR-379-3p	0.230755	0.88383	0.892889	0.171933	-0.594076	0.610447
hsa-miR-379-5p	0.864102	0.239195	1.19114	0.0443782	0.0801639	1
hsa-miR-380-3p	0.135663	0.995329	0.405776	0.700335	-0.511386	0.751289
hsa-miR-380-5p	0.175976	1	0.980306	0.858614	-0.23389	1
hsa-miR-381-3p	2.28809	3.07775e-05	2.67362	5.27126e-07	-0.371183	0.853193
hsa-miR-381-5p	2.10234	0.0462724	2.49522	0.0141923	0.00162332	1
hsa-miR-382-3p	0.799784	0.403499	1.52371	0.0271596	-0.0524408	1
hsa-miR-382-5p	0.66599	0.343756	1.36557	0.00853613	0.25923	0.946444
hsa-miR-3909	0.441321	0.764419	0.87161	0.297715	0.797248	0.610447
hsa-miR-3912-3p	-0.534598	1	0.275517	1	-0.0618961	1
hsa-miR-3913-5p	-0.4669	1	0.998105	0.958334	0.218918	1
hsa-miR-3928-3p	0.757343	0.902946	-0.0906807	1	0.805093	1
hsa-miR-3939	-2.67417	0.21539	-0.695154	0.968994	-0.296785	1
hsa-miR-3940-3p	-1.59222	0.496042	-1.71739	0.61982	-0.0942929	1
hsa-miR-3960	1.93641	0.0842403	-1.25924	0.273942	0.689233	0.830093
hsa-miR-409-3p	0.275649	0.856331	0.856275	0.207466	-0.499566	0.706819
hsa-miR-409-5p	-1.32228	0.632019	0.457426	0.961388	-1.95522	0.56588
hsa-miR-410-3p	1.3063	0.0092493	2.27643	2.1568e-07	-0.199616	0.981232
hsa-miR-410-5p	1.34876	0.467351	3.6933	0.0139142	0.382439	1
hsa-miR-411-3p	0.994049	0.123852	1.50549	0.00545132	-1.13356	0.124987
hsa-miR-411-5p	1.15633	0.0430114	1.80373	0.000272034	-0.297713	0.899782
hsa-miR-412-3p	-0.210597	1	0.719447	1	-0.101764	1
hsa-miR-412-5p	1.40608	0.101953	1.47101	0.171933	0.4137	1
hsa-miR-421	0.527001	0.584756	0.415855	0.681566	-0.0195507	1
hsa-miR-423-3p*	-0.46377	0.547676	-0.255235	0.824842	-0.57417	0.528907
hsa-miR-423-5p*	-0.228281	0.856331	-0.322893	0.711634	-0.16003	1
hsa-miR-424-3p	0.823708	0.392302	1.70505	0.0142495	0.302773	0.973619
hsa-miR-424-5p	1.13587	0.206971	1.86547	0.00975361	1.09384	0.348734
hsa-miR-425-3p	-0.165496	0.973948	-0.528828	0.653654	-0.0902673	1
hsa-miR-425-5p*	-0.510046	0.494342	-0.355778	0.681566	-0.371167	0.790693
hsa-miR-4284	1.01713	0.58726	1.56919	0.287781	1.00724	0.706819
hsa-miR-4286	1.27888	0.0842403	0.733688	0.422295	1.26872	0.182493
hsa-miR-431-3p	2.08222	9.5917e-05	2.90332	2.0774e-08	0.00686808	1
hsa-miR-431-5p	1.5522	0.00819579	2.58928	5.67349e-07	-0.347996	0.876276
hsa-miR-432-3p	1.32746	0.496042	1.46926	0.47879	-0.891088	1
hsa-miR-432-5p	1.16929	0.0358494	2.23567	1.88026e-06	0.654218	0.492542
hsa-miR-4326	-0.752763	0.65157	-0.690818	0.649348	0.135565	1
hsa-miR-433-3p	2.02438	0.000261554	2.26302	3.41811e-05	-0.0155076	1
hsa-miR-433-5p	0.0683611	1	1.86563	0.086687	1.46733	0.769449
hsa-miR-4417	0.546499	1	1.16024	0.858614	0.855889	1
hsa-miR-4435	-0.166052	1	-0.533218	1	0.655692	0.961116
hsa-miR-4443	-3.46833	0.617079	1.10156	0.964916	-2.00399	0.876276
hsa-miR-4448	1.04681	0.887562	0.332691	1	0.458296	1
hsa-miR-4449	2.85623	0.405626	1.25942	0.910219	-1.95117	1
hsa-miR-4454	0.552825	0.700747	0.176914	1	0.916171	0.528136
hsa-miR-4455	-1.41101	0.33807	-0.853232	0.663867	0.152755	1
hsa-miR-4461	-0.0184318	1	-0.467649	0.933182	0.843936	0.807012
hsa-miR-4466	-1.49434	0.536734	-0.954639	0.681566	1.9111	0.633896
hsa-miR-4473	0.193207	1	0.208387	1	1.3918	1
hsa-miR-4485-3p	1.65033	0.260464	1.58047	0.251034	2.23776	0.156649
hsa-miR-4488	-1.18338	0.295454	-3.92884	5.27126e-07	-1.46584	0.292807
hsa-miR-4492	0.140147	1	-1.3049	0.536124	-2.67178	0.509407
hsa-miR-4497	4.05721	0.0374841	1.71359	0.430104	1.94327	0.52633
hsa-miR-4508	-0.0897777	1	2.7638	0.607485	-1.47918	0.920902
hsa-miR-450a-2-3p	0.0825014	1	1.54891	0.660419	1.2525	0.991264
hsa-miR-450a-5p*	1.33495	0.0170346	2.05393	3.70682e-05	1.09363	0.136629
hsa-miR-450b-5p*	0.848166	0.246068	1.78805	0.00134065	0.323258	0.90807
hsa-miR-4510	0.216137	1	1.77842	0.911535	0.514968	1
hsa-miR-4516	1.15225	0.515766	-2.31717	0.0303629	-0.146162	1
hsa-miR-4517	-5.87802	0.0626466	-3.33118	0.211086	-0.799495	1
hsa-miR-4521	0.00335776	1	-1.27532	0.474091	0.147884	1
hsa-miR-4523	-0.894401	0.798108	-1.5076	0.826277	-2.43407	1
hsa-miR-452-5p	-1.09345	0.115229	-1.25083	0.0318864	-0.543519	0.732326
hsa-miR-4531	-0.362767	0.945664	0.249977	1	0.647954	0.987269
hsa-miR-4532	-3.76824	0.0102386	-3.05562	0.0298673	-0.384323	1
hsa-miR-454-3p	-0.46396	0.562929	-0.393267	0.64415	-0.544363	0.56588
hsa-miR-454-5p	-0.607868	0.640309	-0.53773	0.649348	-0.981502	0.56588
hsa-miR-455-3p	0.292108	0.877061	0.227777	0.942204	1.5889	0.0689739
hsa-miR-455-5p*	0.11516	0.998935	-0.088471	1	0.2436	0.961116
hsa-miR-4634	4.26614	0.342278	-0.496371	1	1.9373	0.876276
hsa-miR-4638-3p	1.17626	0.71679	-0.422598	1	-2.43308	1
hsa-miR-4645-5p	-0.731196	0.887562	0.784783	0.949514	0.0869926	1
hsa-miR-4661-5p	-0.350133	1	-0.398585	1	-0.234122	1
hsa-miR-4662a-5p	0.371578	1	0.295101	1	0.702197	1
hsa-miR-4677-3p	-1.18309	0.195717	-0.480986	0.700335	-0.353323	0.974843
hsa-miR-4687-5p	0.225802	1	1.59209	1	-0.770647	1
hsa-miR-4707-3p	-4.67578	0.234687	-2.14784	0.607839	1.02804	1
hsa-miR-4717-3p	1.29919	0.739653	-2.99574	0.255166	-2.94278	0.920902
hsa-miR-4725-3p	-0.692865	1	-0.105791	1	-3.51757	0.696731
hsa-miR-4725-5p	-3.78127	0.58726	0.0872947	1	-0.20903	1
hsa-miR-4741	-2.18119	0.301385	0.142132	1	-2.46912	0.537
hsa-miR-4745-5p	-0.0439404	1	-1.49007	0.716118	-3.78741	0.769449
hsa-miR-4746-5p	-0.969725	0.603693	-0.446674	0.908649	-1.59568	0.358297
hsa-miR-4767	0.854089	1	1.72573	0.572554	2.04097	0.847022
hsa-miR-4775	-0.784712	0.603693	-0.735663	0.68251	-0.437669	0.966351
hsa-miR-4785	1.03725	0.7023	-2.82831	0.237428	-0.0990762	1
hsa-miR-4786-5p	0.248963	1	-0.29212	1	-1.29612	1
hsa-miR-4787-3p	1.1769	0.719656	-0.725772	1	1.93574	0.656593
hsa-miR-4787-5p	-0.0806892	1	-2.1494	0.603504	-0.603732	1
hsa-miR-4792	0.40688	0.880999	-1.38194	0.239464	0.80909	0.736312
hsa-miR-4800-3p	0.516663	1	-2.21083	0.510364	0.568891	1
hsa-miR-4804-5p	-0.176599	1	1.56919	0.703028	1.39223	1
hsa-miR-483-3p	-0.290317	0.880999	-1.23272	0.111545	0.576968	0.749402
hsa-miR-483-5p*	0.235379	0.871221	-0.368121	0.700335	-0.14947	1
hsa-miR-484*	-0.123782	0.973948	0.170538	0.921813	-0.0897779	1
hsa-miR-485-3p	0.0665593	1	0.531972	0.607839	-0.931814	0.365991
hsa-miR-485-5p	0.439862	0.644973	0.241873	0.879661	-0.0183477	1
hsa-miR-486-3p	1.97791	0.127319	0.88045	0.603504	2.14493	0.876276
hsa-miR-486-5p	4.85473	3.64494e-16	3.19245	2.0774e-08	2.6088	2.58668e-05
hsa-miR-487a-3p	0.88332	0.252628	1.77499	0.00261617	-1.09064	0.268002
hsa-miR-487a-5p	1.0131	0.590764	1.21006	0.420021	-0.374728	1
hsa-miR-487b-3p	1.12643	0.0280409	1.62191	0.000276084	-0.0576905	1
hsa-miR-487b-5p	1.4397	0.392302	0.463055	1	-0.292698	1
hsa-miR-490-3p	-1.52916	0.427483	-2.00688	0.47879	0.0242166	1
hsa-miR-491-3p	-2.90938	0.830402	-0.0350116	1	2.15281	1
hsa-miR-491-5p	0.499455	1	-0.675868	0.911535	0.116206	1
hsa-miR-493-3p	0.730282	0.246068	1.31162	0.00788562	-0.0275971	1
hsa-miR-493-5p	0.793839	0.230849	1.54313	0.00226246	-0.208281	0.989858
hsa-miR-494-3p	-0.0829184	1	-0.227337	0.901371	-0.726797	0.454187
hsa-miR-494-5p	0.803009	0.974813	-0.364945	1	-2.75989	1
hsa-miR-495-3p	0.85802	0.244594	1.27402	0.0325484	-0.9816	0.332555
hsa-miR-495-5p	1.5708	0.887562	2.315	0.369831	-2.63829	1
hsa-miR-496	1.06589	0.240715	1.75199	0.0143362	-0.477749	0.892106
hsa-miR-497-5p	-1.08543	0.592343	-0.495856	0.964207	0.308611	1
hsa-miR-499a-5p	8.13218	2.57766e-06	5.27093	4.4336e-06	1.13754	1
hsa-miR-5000-3p	-0.69359	1	-0.326401	1	-0.154046	1
hsa-miR-5001-3p	0.267248	1	1.24413	0.681403	1.47183	1
hsa-miR-500a-3p	2.14096	3.50286e-07	2.31063	2.0774e-08	1.22579	0.0350661
hsa-miR-500a-5p	2.87663	8.70105e-05	2.62922	0.000186693	0.0710432	1
hsa-miR-5010-3p	0.885473	0.901234	-0.506131	1	1.52932	0.840881
hsa-miR-501-3p*	1.05527	0.376385	2.20733	0.00983757	0.463662	0.946444
hsa-miR-501-5p	3.68738	0.000103118	4.11459	3.36373e-05	2.4272	0.292807
hsa-miR-502-3p	1.02468	0.239195	1.4812	0.0229473	1.10015	0.408534
hsa-miR-502-5p	1.75111	0.202474	2.44402	0.0143073	1.75223	0.480216
hsa-miR-503-3p	0.0163941	1	0.668363	0.681566	-0.0095688	1
hsa-miR-503-5p*	1.29042	0.0109086	1.80821	8.21356e-05	1.09397	0.0998212
hsa-miR-505-3p	-0.976926	0.188445	-0.557251	0.572554	-0.235917	0.989858
hsa-miR-505-5p	-0.998843	0.875598	-1.15967	0.792242	-1.26354	0.638194
hsa-miR-5091	0.312611	1	0.85307	1	-1.41688	0.840881
hsa-miR-5095	-1.94041	0.408455	0.182083	1	-1.4626	0.614051
hsa-miR-5096	0.0512784	1	0.52319	0.777687	-0.428991	0.961116
hsa-miR-5100	1.76112	0.188445	-1.94278	0.149248	0.525608	0.981232
hsa-miR-532-3p	2.87748	1.45814e-05	1.81521	0.00646322	1.0665	0.492542
hsa-miR-532-5p*	2.85066	1.99813e-08	2.88257	8.04395e-09	1.52072	0.0237822
hsa-miR-539-3p	0.128271	0.983321	0.766383	0.200379	-1.22501	0.0873853
hsa-miR-539-5p	-0.243294	0.914844	0.274016	0.923869	-1.39013	0.156649
hsa-miR-541-3p	1.58194	0.225597	0.788672	0.658842	-1.09403	0.876276
hsa-miR-541-5p	0.0953181	1	0.143417	1	-2.21913	0.358297
hsa-miR-542-3p*	2.04652	4.52712e-05	2.45478	5.43726e-07	1.22024	0.0988076
hsa-miR-542-5p	1.77241	0.0926774	2.18592	0.0377319	2.2641	0.0988076
hsa-miR-543	0.388018	0.8202	0.988431	0.237428	-1.07716	0.358297
hsa-miR-545-5p	0.210269	1	0.526887	1	-4.29833	0.408534
hsa-miR-548aa	-3.81409	0.58726	-0.693845	1	-0.859477	1
hsa-miR-548ad-5p	-1.61922	0.301823	-1.74778	0.152014	-0.652132	0.890753
hsa-miR-548ae-5p	-1.48057	0.090336	-1.63956	0.0391611	-0.7704	0.677668
hsa-miR-548ag	-2.02814	1	2.36685	0.726232	0.662041	0.973619
hsa-miR-548ah-3p	-0.592919	1	-1.07918	0.777723	-0.303438	1
hsa-miR-548al	-0.5398	1	-0.918073	1	0.56059	1
hsa-miR-548am-5p	0.829197	0.880999	2.16082	0.137457	0.974884	0.696039
hsa-miR-548au-5p	0.689655	1	0.331973	1	-0.897162	1
hsa-miR-548ay-5p	-1.70465	0.239195	-1.77729	0.130402	-0.464774	0.961116
hsa-miR-548b-5p	-1.48322	0.377999	-1.56246	0.197769	-0.539109	0.970477
hsa-miR-548c-5p	0.836445	0.880999	1.6581	0.417155	0.346632	1
hsa-miR-548d-5p	-0.885946	0.590764	-1.3979	0.179781	-0.11026	1
hsa-miR-548e-3p	-0.489548	0.856331	-0.411945	0.908649	-0.274182	1
hsa-miR-548e-5p	-0.221223	1	-0.126921	1	-0.137994	1
hsa-miR-548h-3p	0.750217	0.856581	-0.959369	0.777687	-0.826095	0.989858
hsa-miR-548h-5p	-1.75393	0.0908491	-1.35223	0.165504	-2.31246	0.0689739
hsa-miR-548k	-0.612026	0.644973	-0.701124	0.550035	-1.08151	0.449272
hsa-miR-548l	0.485545	1	-0.668827	1	-2.43407	1
hsa-miR-548n	0.579638	0.995329	-0.810874	0.949514	-0.33191	1
hsa-miR-548o-3p	-0.45761	0.85163	-0.422624	0.847322	-0.678693	0.746477
hsa-miR-548o-5p	0.836701	0.880999	1.65813	0.417155	0.34659	1
hsa-miR-548p	-0.59322	1	-2.18372	0.538431	0.139149	1
hsa-miR-548t-3p	-3.81409	0.58726	-0.693845	1	-0.859477	1
hsa-miR-548u	-0.0473154	1	-0.344156	1	-4.84301	0.292807
hsa-miR-548w	-0.968477	0.875598	-0.419946	1	-0.16568	1
hsa-miR-548z	0.750199	0.856581	-0.959368	0.777687	-0.826101	0.989858
hsa-miR-550a-3p	-0.756201	0.752538	-0.778543	0.675896	-0.360528	0.989858
hsa-miR-550a-5p	-2.83294	0.00856446	-0.687159	0.654073	-0.764964	0.793891
hsa-miR-5585-3p	-0.0533045	1	-0.0565523	1	-1.33784	0.514195
hsa-miR-561-5p	-1.07376	0.188445	-1.416	0.0482885	-0.691651	0.574204
hsa-miR-5684	0.225802	1	-0.34584	1	-3.19763	0.920902
hsa-miR-5690	-1.48975	0.4029	-1.8249	0.103037	-0.49504	1
hsa-miR-5699-3p	-1.21222	0.607141	-0.51028	1	-1.75939	0.595022
hsa-miR-5699-5p	-0.211463	1	1.26382	0.700335	0.287479	1
hsa-miR-5701	0.0170739	1	-0.0357972	1	-1.62026	0.0998212
hsa-miR-573	-3.36278	0.15245	-4.1035	0.474091	-4.60988	0.408816
hsa-miR-574-3p	0.231046	0.880999	-0.0549865	1	1.17257	0.110662
hsa-miR-574-5p*	-0.5683	0.408455	-0.796504	0.151482	-0.222887	0.966351
hsa-miR-576-3p	-1.87723	0.206971	-2.0273	0.131711	-0.628937	0.913894
hsa-miR-576-5p	-1.39366	0.127319	-0.679936	0.570909	-0.871728	0.574204
hsa-miR-577	-0.704619	0.592343	-0.647209	1	-1.29569	1
hsa-miR-580-3p	4.03023	0.400881	-0.492203	1	-1.54154	0.989858
hsa-miR-582-3p	-0.25028	0.893214	-0.492321	0.700335	-0.603022	0.825347
hsa-miR-582-5p	-0.150864	1	-0.150096	1	-0.22168	1
hsa-miR-584-5p	-1.73717	0.00800175	-1.27538	0.0584101	-0.997811	0.348734
hsa-miR-585-5p	0.225802	1	-1.27015	1	4.29056	0.376023
hsa-miR-589-3p	-2.16098	0.0107101	-2.094	0.00768555	-1.72782	0.110406
hsa-miR-589-5p	-1.1157	0.0280409	-1.15826	0.0141519	-0.918312	0.143531
hsa-miR-590-3p	-1.18704	0.343756	-1.15451	0.280313	-1.1943	0.449272
hsa-miR-590-5p	-3.4499	0.58726	-1.92681	0.700335	-0.332855	1
hsa-miR-598-3p*	0.597392	0.632019	0.696805	0.519653	0.221878	1
hsa-miR-6087	-0.403487	0.880999	-2.06249	0.0483855	0.269452	1
hsa-miR-615-3p*	-0.986261	0.175389	-0.832963	0.237428	0.0250312	1
hsa-miR-615-5p*	-2.49336	0.0744179	-0.529828	0.880991	-0.631707	0.840881
hsa-miR-616-5p	-0.914475	0.8202	-0.393611	1	1.32983	0.840881
hsa-miR-618	-0.66583	0.823256	-0.794169	0.837535	-0.590704	0.868782
hsa-miR-619-5p	-0.181193	1	-0.126738	1	-1.07119	0.614051
hsa-miR-624-3p	-0.541568	1	1.40253	0.700335	-0.902925	1
hsa-miR-624-5p	-4.91946	0.117905	-0.279566	1	-1.08066	0.989858
hsa-miR-625-3p	-0.462912	0.8023	-1.47996	0.0683895	-0.551682	0.903007
hsa-miR-625-5p	-0.470538	0.788981	-0.602134	0.607839	-0.100362	1
hsa-miR-627-3p	-1.44641	0.887562	-1.23325	0.777687	0.254376	1
hsa-miR-627-5p	-0.0188839	1	0.192457	1	-0.385787	1
hsa-miR-628-3p	0.0230615	1	-0.134901	1	-1.22974	0.751289
hsa-miR-628-5p	0.738895	0.58726	0.137066	1	0.54553	0.975521
hsa-miR-629-3p	-3.41071	0.835215	-1.64176	0.658842	1.24006	0.769449
hsa-miR-629-5p	-0.380953	0.875598	-0.95182	0.382241	-0.64112	0.769449
hsa-miR-636	-0.37845	1	-0.112733	1	-0.556825	1
hsa-miR-641	0.0908445	1	0.2275	0.949514	0.246517	1
hsa-miR-643	-3.78127	0.58726	0.763195	1	-0.528974	1
hsa-miR-6511a-3p	1.07317	0.504985	0.44489	0.984552	0.609409	0.961116
hsa-miR-6511a-5p	0.539132	0.973948	0.45032	1	1.54465	0.769449
hsa-miR-6511b-3p	-0.865794	0.700747	-0.116646	1	-0.00893561	1
hsa-miR-6511b-5p	0.884307	0.856581	0.00633387	1	1.31583	0.78612
hsa-miR-651-5p	-0.542153	0.995329	0.604701	0.911535	0.353985	1
hsa-miR-652-3p*	-0.348961	0.742456	0.150424	0.964207	-0.572342	0.656593
hsa-miR-652-5p	0.36469	1	-1.39238	0.656256	-0.741042	0.974843
hsa-miR-654-3p	0.344198	0.683395	0.840671	0.103706	-0.260265	0.903501
hsa-miR-654-5p	1.04973	0.291051	0.867584	0.415025	0.0803147	1
hsa-miR-655-3p	1.71831	0.038322	2.2097	0.00291002	0.799341	0.628722
hsa-miR-655-5p	1.79546	0.640309	-0.0585923	1	-0.00723351	1
hsa-miR-656-3p	0.258675	0.875879	1.37754	0.0217157	-0.448144	0.797627
hsa-miR-659-5p	0.767735	0.85163	1.69122	0.668427	-0.224214	1
hsa-miR-660-3p	2.11607	0.481647	2.3411	0.45486	0	1
hsa-miR-660-5p	3.02279	1.00033e-11	3.07882	2.91147e-12	1.26566	0.0512657
hsa-miR-663a	1.94964	0.820241	-0.270897	1	0.236786	1
hsa-miR-664a-3p	1.90331	0.090336	1.97054	0.0383133	1.7047	0.234384
hsa-miR-664a-5p	0.910205	0.880999	1.45718	0.858614	-1.54929	1
hsa-miR-664b-3p	2.21021	0.584756	1.50241	0.913846	3.65792	0.702556
hsa-miR-665	0.390315	0.778124	0.213062	0.945685	-0.666374	0.60074
hsa-miR-668-3p	1.33558	0.160836	1.85888	0.0669511	0.365085	0.989858
hsa-miR-671-3p*	-1.20899	0.0527182	-1.18319	0.0421526	0.245469	0.97815
hsa-miR-671-5p*	-1.74886	0.0298557	-2.02894	0.00614175	-1.17942	0.323127
hsa-miR-6716-3p	-0.200128	1	0.396737	0.949343	-0.579064	0.981232
hsa-miR-6723-5p	0.535311	0.965981	0.0868064	1	-0.982116	1
hsa-miR-6724-5p	-1.26265	0.459557	-0.139246	1	-1.36968	0.624641
hsa-miR-6735-5p	0.0843522	1	-2.46597	0.584058	-2.43407	1
hsa-miR-675-3p	0.257437	0.875879	-0.0124344	1	1.07524	0.305813
hsa-miR-675-5p*	0.0754228	1	0.168801	0.958334	0.529168	0.709818
hsa-miR-6756-3p	-1.17641	0.685781	-2.7696	0.0141519	-2.35117	0.337505
hsa-miR-6770-3p	1.60466	0.58726	2.36539	0.716118	1.06346	1
hsa-miR-6797-3p	4.03023	0.400881	-1.03174	0.911535	-0.788594	1
hsa-miR-6852-5p	0.707927	0.830402	1.02993	0.660389	0.606091	1
hsa-miR-6866-5p	-0.0235651	1	3.30892	0.826277	-2.43407	1
hsa-miR-6881-3p	0.543514	0.965981	-1.6024	0.826277	-1.96765	1
hsa-miR-708-3p*	-0.624622	0.407077	-0.165161	0.961388	-0.26406	0.95759
hsa-miR-708-5p*	-0.463373	0.590764	-0.00108674	1	0.140147	1
hsa-miR-7-1-3p	-1.11912	0.494342	-0.769442	0.637918	-0.562937	0.955239
hsa-miR-744-3p	-1.01106	0.456337	-0.464302	0.876365	-1.09905	0.592635
hsa-miR-744-5p*	-0.936741	0.0839445	-1.05825	0.0302145	-0.368568	0.769449
hsa-miR-758-3p	0.0874567	1	0.593635	0.343702	-0.981601	0.136629
hsa-miR-758-5p	-1.24385	0.343756	0.930549	0.700335	0.114217	1
hsa-miR-7-5p	-3.32872	0.000763156	-3.46453	0.000203633	-3.7943	0.000322763
hsa-miR-760	-1.54118	0.139883	-1.6766	0.109633	-1.08912	0.744586
hsa-miR-7641	0.378735	0.880999	-0.730481	0.644418	1.09653	0.507095
hsa-miR-766-3p	-0.0318068	1	0.726895	0.658842	1.13273	0.332555
hsa-miR-767-3p	-1.62344	0.553814	-0.399394	1	-1.96765	1
hsa-miR-767-5p	-0.882154	0.287009	-0.155433	1	-1.17808	0.365766
hsa-miR-769-3p	0.325575	0.989681	0.17662	1	1.36367	0.554556
hsa-miR-769-5p	0.185151	0.880999	0.651159	0.23712	0.200502	0.974843
hsa-miR-7704	1.8411	0.0842403	-1.17123	0.248745	0.469464	0.913894
hsa-miR-7705	0.988973	1	-0.876448	1	-0.499402	1
hsa-miR-770-5p	0.384685	0.880999	-0.444489	0.878777	-0.750945	0.769449
hsa-miR-7706	0.628985	0.407077	0.41072	0.661669	0.0407764	1
hsa-miR-7851-3p	0.332502	1	-0.693845	1	0.554521	1
hsa-miR-7974	-4.39282	0.0006095	-4.10133	0.00147122	-4.7922	0.00174414
hsa-miR-7976	0.0137141	1	-1.46627	0.64415	-0.0666497	1
hsa-miR-7977	0.424006	0.734002	-0.715541	0.420021	1.44109	0.0988076
hsa-miR-873-3p	-2.0234	1	0.00798292	1	0.304624	1
hsa-miR-874-3p	0.151053	0.995329	0.45366	0.681566	0.685429	0.628722
hsa-miR-874-5p	1.94373	0.105855	1.70835	0.287781	1.96876	0.449272
hsa-miR-877-5p*	0.307813	0.785127	0.153954	0.961388	0.213437	1
hsa-miR-887-3p	0.952526	0.122368	0.766067	0.221543	0.759549	0.449272
hsa-miR-887-5p	0.0413158	1	0.190358	1	1.32913	0.519516
hsa-miR-889-3p	0.598508	0.450085	0.992968	0.0941505	-0.731817	0.449272
hsa-miR-889-5p	-0.995158	0.880999	-0.100799	1	0.998224	0.840881
hsa-miR-92a-1-5p	-0.70042	0.662463	-2.28984	0.0121937	-2.40766	0.0944069
hsa-miR-92a-3p*	-0.419734	0.58726	-0.167715	0.919218	-0.297325	0.856178
hsa-miR-92b-3p*	-1.37953	0.0161872	-1.39488	0.00983757	-1.19446	0.0988076
hsa-miR-92b-5p	0.147924	1	-1.77005	0.130107	-1.59325	0.537
hsa-miR-93-3p	-0.988643	0.305017	-1.13274	0.158486	-0.669129	0.702556
hsa-miR-935	0.0858846	1	-1.37022	0.661669	-0.445092	1
hsa-miR-93-5p*	-0.48258	0.492257	-0.615123	0.280313	-0.936738	0.127336
hsa-miR-937-3p	0.889535	0.662463	0.387413	1	0.776108	0.984858
hsa-miR-939-5p	-0.248657	1	1.26916	1	-0.050622	1
hsa-miR-940	-0.538013	0.823427	-0.145358	1	-0.503693	0.983117
hsa-miR-941	-0.598871	0.354481	-0.537209	0.395798	-0.457515	0.63461
hsa-miR-942-5p	-0.771765	0.793602	-0.383327	0.913846	-0.696117	0.892106
hsa-miR-943	2.42284	0.329606	2.51122	0.660389	1.00042	1
hsa-miR-9-5p*	0.550435	1	0.774975	1	-1.07664	1
hsa-miR-96-5p*	1.00037	0.875598	-0.918636	1	-2.76827	1
hsa-miR-98-3p	-0.226551	0.889255	0.444904	0.700335	-1.16403	0.305813
hsa-miR-98-5p*	0.248481	0.835241	0.28106	0.777687	-0.328174	0.840881
hsa-miR-99a-3p	0.588285	0.643118	1.3258	0.086687	0.887931	0.610447
hsa-miR-99a-5p*	0.414228	0.791252	0.921895	0.290466	1.10423	0.342001
hsa-miR-99b-3p*	-0.0461137	1	0.00322234	1	-0.145468	1
hsa-miR-99b-5p*	-1.01321	0.486784	-0.306869	0.949343	-0.205631	1
*miRNA represented in both human and mouse miRNA data

## Sheet: Supplemental Table 5
miRNA ID	Confidence	mRNA Targets
miR-125b-1-3p	High	NDRG2
	Moderate	B3GALT5, CASZ1, CDH13, DHCR24, SOX8, UNC45B
miR-149-5p	High	ID3, CSF1
	Moderate	LPL, ANXA8/ANXA8L1, SLC48A1
miR-155-5p	Experimental	CYP51A1, MSI2, TM6SF1
	High	ACTA1, DYNC1I1, GATM, PTN
	Moderate	CD36, CHRNG, E2F2, FUT9, GJA5, HMGCS1, IGF2, MEF2A, MYOZ2, OGN, PKIA, SCN7A, TFRC
miR-188-5p	High	GREM1, SRXN1, RGS20
	Moderate	TM4SF1
miR-221-5p	High	ANXA11, CAMK2A, CLDN2, DBNDD1, DPEP1, GPRC5C, LDLR, LYNX1, MYZAP, RGMA, SMTNL2, TMEM38A
	Moderate	ADAMTS16, ANK1, ANKRD23, ARHGEF3, ARHGEF37, BMF, CAMK1G, CCDC88C, CHRND, CMKLR1, CNR1, COBL, CSDC2, DHCR7, E2F2, EDNRA, FADS2, FNDC5, GYS1, HMGCS1, IDI1, IP6K3, KCNB1, KLHL8, KSR1, LZTS1, MMP15, NMRK2, PPP1R14C, RAB44, RBM24, SCN7A, SGCD, SLC16A2, SLC2A6, STARD4, SUSD5, TCAP, TCEAL6, TFRC, TNNI2, TRIM54, UCP2, ZFP36L1
miR-222-3p	Experimental	BMF
	High	CPEB3, TSPAN13
	Moderate	ANKRD10, ASPA, AXIN2, CASZ1, CNR1, GABRB2, LYNX1, MYOZ2, RBM24, SCD
miR-25-5p	High	CORO6, TGFBI
	Moderate	ALOX5AP, ANK1, ASPA, ATP9A, BCAM, CSDC2, DYSF, FAM78A, GYS1, KIAA0513, KLHL30, RAP1GAP2, TNNC2, TNNI1, TNNT3
miR-29b-3p	High	ID1
	Moderate	ANGPTL4, EREG, ID3, LPL, TWIST2
miR-335-3p	None	None
miR-339-5p	Experimental	BCL6
	High	HEYL
	Moderate	ABCC9, ANK1, C1QTNF3, CDKN1A, CHRND, CMKLR1, IGDCC4, IGFBP3, KIF24, MMP15, NEB, PSTPIP2, RAB3IL1, SHISA2, SLC26A6, SLC2A4, SLC2A6, SORBS1, SORT1, TNNI1, UNC45B
miR-362-5p	Moderate	CYP1B1
miR-378a-3p	Moderate	TM4SF1, TNFSF15
miR-378a-5p	Moderate	GREM1, PTPRN, FGF7
miR-450a-5p	Moderate	FOXC2, TNFSF15
miR-503-5p	Experimental	CCND1
	Moderate	CA6, FGF7, FOSL1, HMGA1, PTPRN, SMAD7
miR-542-3p	Experimental	PTGS2
	High	SLC48A1
	Moderate	TNFSF15
miR-671-5p	High	CAPN3, DHCR24, MYOM3
	Moderate	ARX, ATP1A2, CMKLR1, CYFIP2, DDC, RGMA, SCD, SLC16A2, SORBS2, TMEM229B
miR-92b-3p	Experimental	CDKN1A
	High	ACTC1, CAMK2A, CPEB3, USP28
	Moderate	ADAM19, ADAMTSL1, ANKRD44, CDK5R1, CPEB2, DMP1, FRY, GRAMD1B, GRK5, IMPA2, KLHL31, MEF2D, RASSF3, SLC24A3, UBASH3B, VASH2

## Sheet: Supplemental Table 6
Functional Category	Enrichment FDR	mRNAs Targets in Pathway	miRNAs Targeting the Pathway
Muscle structure development	7.4e-13	30	mmu-miR-125b-1-3p, mmu-miR-149-5p, mmu-miR-155-5p, mmu-miR-188-5p, mmu-miR-221-5p, mmu-miR-222-3p, mmu-miR-25-5p, mmu-miR-29b-3p, mmu-miR-339-5p, mmu-miR-378a-5p, mmu-miR-450a-5p, mmu-miR-503-5p, mmu-miR-671-5p, mmu-miR-32-5p, mmu-miR-92a-3p, mmu-miR-92b-3p
Muscle system process	1.33e-12	25	mmu-miR-155-5p, mmu-miR-221-5p, mmu-miR-222-3p, mmu-miR-25-5p, mmu-miR-339-5p, mmu-miR-503-5p, mmu-miR-542-3p, mmu-miR-671-5p, mmu-miR-32-5p, mmu-miR-92a-3p, mmu-miR-92b-3p
Circulatory system development	3.22e-11	35	mmu-miR-125b-1-3p, mmu-miR-149-5p, mmu-miR-155-5p, mmu-miR-188-5p, mmu-miR-221-5p, mmu-miR-222-3p, mmu-miR-25-5p, mmu-miR-29b-3p, mmu-miR-339-5p, mmu-miR-362-5p, mmu-miR-378a-5p, mmu-miR-450a-5p, mmu-miR-503-5p, mmu-miR-542-3p, mmu-miR-671-5p, mmu-miR-32-5p, mmu-miR-92a-3p, mmu-miR-92b-3p
Muscle contraction	6.7e-11	21	mmu-miR-155-5p, mmu-miR-221-5p, mmu-miR-25-5p, mmu-miR-339-5p, mmu-miR-503-5p, mmu-miR-542-3p, mmu-miR-671-5p, mmu-miR-32-5p, mmu-miR-92a-3p, mmu-miR-92b-3p
Anatomical structure formation involved in morphogenesis	1.85e-10	35	mmu-miR-125b-1-3p, mmu-miR-155-5p, mmu-miR-188-5p, mmu-miR-221-5p, mmu-miR-222-3p, mmu-miR-25-5p, mmu-miR-29b-3p, mmu-miR-339-5p, mmu-miR-339-5p, mmu-miR-362-5p, mmu-miR-378a-3p, mmu-miR-378a-5p, mmu-miR-450a-5p, mmu-miR-542-3p, mmu-miR-671-5p, mmu-miR-32-5p, mmu-miR-92a-3p, mmu-miR-92b-3p
Muscle organ development	5.11e-09	20	mmu-miR-125b-1-3p, mmu-miR-149-5p, mmu-miR-155-5p, mmu-miR-188-5p, mmu-miR-221-5p, mmu-miR-222-3p, mmu-miR-25-5p, mmu-miR-29b-3p, mmu-miR-339-5p, mmu-miR-378a-5p, mmu-miR-450a-5p, mmu-miR-503-5p, mmu-miR-671-5p, mmu-miR-32-5p, mmu-miR-92a-3p, mmu-miR-92b-3p
Heart development	5.76e-09	23	mmu-miR-149-5p, mmu-miR-155-5p, mmu-miR-188-5p, mmu-miR-221-5p, mmu-miR-222-3p, mmu-miR-25-5p, mmu-miR-29b-3p, mmu-miR-339-5p, mmu-miR-378a-5p, mmu-miR-450a-5p, mmu-miR-503-5p, mmu-miR-671-5p, mmu-miR-32-5p, mmu-miR-92a-3p, mmu-miR-92b-3p
Striated muscle tissue development	1.41e-08	19	mmu-miR-125b-1-3p, mmu-miR-155-5p, mmu-miR-188-5p, mmu-miR-221-5p, mmu-miR-222-3p, mmu-miR-25-5p, mmu-miR-339-5p, mmu-miR-378a-5p, mmu-miR-450a-5p, mmu-miR-503-5p, mmu-miR-671-5p, mmu-miR-32-5p, mmu-miR-92a-3p, mmu-miR-92b-3p
Response to nitrogen compound	1.92e-08	31	mmu-miR-125b-1-3p, mmu-miR-149-5p, mmu-miR-155-5p, mmu-miR-221-5p, mmu-miR-222-3p, mmu-miR-29b-3p, mmu-miR-339-5p, mmu-miR-378a-5p, mmu-miR-450a-5p, mmu-miR-503-5p, mmu-miR-542-3p, mmu-miR-671-5p, mmu-miR-32-5p, mmu-miR-92a-3p, mmu-miR-92b-3p
Cell differentiation	1.92e-08	68	mmu-miR-125b-1-3p, mmu-miR-149-5p, mmu-miR-155-5p, mmu-miR-188-5p, mmu-miR-221-5p, mmu-miR-222-3p, mmu-miR-25-5p, mmu-miR-29b-3p, mmu-miR-339-5p, mmu-miR-378a-5p, mmu-miR-450a-5p, mmu-miR-503-5p, mmu-miR-542-3p, mmu-miR-671-5p, mmu-miR-32-5p, mmu-miR-92a-3p, mmu-miR-92b-3p
Cellular developmental process	1.92e-08	70	mmu-miR-378a-5p, mmu-miR-125b-1-3p, mmu-miR-149-5p, mmu-miR-155-5p, mmu-miR-188-5p, mmu-miR-221-5p, mmu-miR-222-3p, mmu-miR-25-5p, mmu-miR-29b-3p, mmu-miR-339-5p, mmu-miR-450a-5p, mmu-miR-503-5p, mmu-miR-542-3p, mmu-miR-671-5p, mmu-miR-32-5p, mmu-miR-92a-3p, mmu-miR-92b-3p
Muscle tissue development	1.92e-08	19	mmu-miR-125b-1-3p, mmu-miR-155-5p, mmu-miR-188-5p, mmu-miR-221-5p, mmu-miR-222-3p, mmu-miR-25-5p, mmu-miR-339-5p, mmu-miR-378a-5p, mmu-miR-450a-5p, mmu-miR-503-5p, mmu-miR-671-5p, mmu-miR-32-5p, mmu-miR-92a-3p, mmu-miR-92b-3p
Anatomical structure morphogenesis	2.2e-08	51	mmu-miR-125b-1-3p, mmu-miR-149-5p, mmu-miR-155-5p, mmu-miR-188-5p, mmu-miR-221-5p, mmu-miR-222-3p, mmu-miR-25-5p, mmu-miR-29b-3p, mmu-miR-339-5p, mmu-miR-362-5p, mmu-miR-378a-3p, mmu-miR-378a-5p, mmu-miR-450a-5p, mmu-miR-503-5p, mmu-miR-542-3p, mmu-miR-671-5p, mmu-miR-32-5p, mmu-miR-92a-3p, mmu-miR-92b-3p
Muscle cell differentiation	2.27e-08	18	mmu-miR-155-5p, mmu-miR-188-5p, mmu-miR-221-5p, mmu-miR-222-3p, mmu-miR-25-5p, mmu-miR-29b-3p, mmu-miR-339-5p, mmu-miR-378a-5p, mmu-miR-671-5p, mmu-miR-32-5p, mmu-miR-92a-3p, mmu-miR-92b-3p
Response to organonitrogen compound	3.12e-08	29	mmu-miR-125b-1-3p, mmu-miR-149-5p, mmu-miR-155-5p, mmu-miR-221-5p, mmu-miR-222-3p, mmu-miR-29b-3p, mmu-miR-339-5p, mmu-miR-378a-5p, mmu-miR-450a-5p, mmu-miR-503-5p, mmu-miR-542-3p, mmu-miR-671-5p, mmu-miR-32-5p, mmu-miR-92a-3p, mmu-miR-92b-3p
Response to endogenous stimulus	3.5e-08	38	mmu-miR-125b-1-3p, mmu-miR-149-5p, mmu-miR-155-5p, mmu-miR-188-5p, mmu-miR-221-5p, mmu-miR-222-3p, mmu-miR-29b-3p, mmu-miR-339-5p, mmu-miR-378a-5p, mmu-miR-450a-5p, mmu-miR-503-5p, mmu-miR-542-3p, mmu-miR-671-5p, mmu-miR-32-5p, mmu-miR-92a-3p, mmu-miR-92b-3p
Muscle filament sliding	3.5e-08	8	mmu-miR-155-5p, mmu-miR-221-5p, mmu-miR-25-5p, mmu-miR-339-5p, mmu-miR-32-5p, mmu-miR-92a-3p, mmu-miR-92b-3p
Actin-myosin filament sliding	3.5e-08	8	mmu-miR-155-5p, mmu-miR-221-5p, mmu-miR-25-5p, mmu-miR-339-5p, mmu-miR-32-5p, mmu-miR-92a-3p, mmu-miR-92b-3p
Striated muscle cell differentiation	3.5e-08	16	mmu-miR-155-5p, mmu-miR-188-5p, mmu-miR-221-5p, mmu-miR-222-3p, mmu-miR-25-5p, mmu-miR-339-5p, mmu-miR-378a-5p, mmu-miR-671-5p, mmu-miR-32-5p, mmu-miR-92a-3p, mmu-miR-92b-3p
Actin-mediated cell contraction	5.28e-08	11	mmu-miR-155-5p, mmu-miR-221-5p, mmu-miR-25-5p, mmu-miR-339-5p, mmu-miR-671-5p, mmu-miR-32-5p, mmu-miR-92a-3p, mmu-miR-92b-3p
Tube development	5.39e-08	29	mmu-miR-125b-1-3p, mmu-miR-149-5p, mmu-miR-155-5p, mmu-miR-188-5p, mmu-miR-221-5p, mmu-miR-25-5p, mmu-miR-29b-3p, mmu-miR-339-5p, mmu-miR-362-5p, mmu-miR-378a-5p, mmu-miR-450a-5p, mmu-miR-503-5p, mmu-miR-542-3p, mmu-miR-671-5p, mmu-miR-32-5p, mmu-miR-92a-3p, mmu-miR-92b-3p
Regulation of multicellular organismal process	5.39e-08	56	mmu-miR-125b-1-3p, mmu-miR-149-5p, mmu-miR-155-5p, mmu-miR-188-5p, mmu-miR-221-5p, mmu-miR-222-3p, mmu-miR-25-5p, mmu-miR-29b-3p, mmu-miR-339-5p, mmu-miR-362-5p, mmu-miR-378a-5p, mmu-miR-450a-5p, mmu-miR-503-5p, mmu-miR-542-3p, mmu-miR-671-5p, mmu-miR-32-5p, mmu-miR-92a-3p, mmu-miR-92b-3p
Muscle cell development	5.39e-08	13	mmu-miR-155-5p, mmu-miR-221-5p, mmu-miR-222-3p, mmu-miR-25-5p, mmu-miR-339-5p, mmu-miR-671-5p, mmu-miR-32-5p, mmu-miR-92a-3p, mmu-miR-92b-3p
Supramolecular fiber organization	1.54e-07	23	mmu-miR-155-5p, mmu-miR-188-5p, mmu-miR-221-5p, mmu-miR-222-3p, mmu-miR-25-5p, mmu-miR-29b-3p, mmu-miR-339-5p, mmu-miR-362-5p, mmu-miR-378a-5p, mmu-miR-450a-5p, mmu-miR-671-5p, mmu-miR-32-5p, mmu-miR-92a-3p, mmu-miR-92b-3p
Tissue development	1.54e-07	42	mmu-miR-125b-1-3p, mmu-miR-149-5p, mmu-miR-155-5p, mmu-miR-188-5p, mmu-miR-221-5p, mmu-miR-222-3p, mmu-miR-25-5p, mmu-miR-29b-3p, mmu-miR-339-5p, mmu-miR-362-5p, mmu-miR-378a-5p, mmu-miR-450a-5p, mmu-miR-503-5p, mmu-miR-542-3p, mmu-miR-671-5p, mmu-miR-32-5p, mmu-miR-92a-3p, mmu-miR-92b-3p
Myofibril assembly	1.54e-07	9	mmu-miR-155-5p, mmu-miR-221-5p, mmu-miR-222-3p, mmu-miR-25-5p, mmu-miR-339-5p, mmu-miR-671-5p, mmu-miR-32-5p, mmu-miR-92a-3p, mmu-miR-92b-3p
Actin filament-based process	1.61e-07	24	mmu-miR-155-5p, mmu-miR-221-5p, mmu-miR-222-3p, mmu-miR-25-5p, mmu-miR-29b-3p, mmu-miR-339-5p, mmu-miR-378a-5p, mmu-miR-503-5p, mmu-miR-671-5p, mmu-miR-32-5p, mmu-miR-92a-3p, mmu-miR-92b-3p
Striated muscle cell development	2.03e-07	12	mmu-miR-155-5p, mmu-miR-221-5p, mmu-miR-222-3p, mmu-miR-25-5p, mmu-miR-339-5p, mmu-miR-671-5p, mmu-miR-32-5p, mmu-miR-92a-3p, mmu-miR-92b-3p
Tube morphogenesis	2.16e-07	25	mmu-miR-125b-1-3p, mmu-miR-149-5p, mmu-miR-155-5p, mmu-miR-188-5p, mmu-miR-221-5p, mmu-miR-25-5p, mmu-miR-29b-3p, mmu-miR-362-5p, mmu-miR-378a-5p, mmu-miR-450a-5p, mmu-miR-503-5p, mmu-miR-542-3p, mmu-miR-671-5p, mmu-miR-32-5p, mmu-miR-92a-3p, mmu-miR-92b-3p
Regulation of developmental process	2.39e-07	48	mmu-miR-125b-1-3p, mmu-miR-149-5p, mmu-miR-155-5p, mmu-miR-188-5p, mmu-miR-221-5p, mmu-miR-222-3p, mmu-miR-25-5p, mmu-miR-29b-3p, mmu-miR-339-5p, mmu-miR-362-5p, mmu-miR-378a-5p, mmu-miR-450a-5p, mmu-miR-503-5p, mmu-miR-542-3p, mmu-miR-671-5p, mmu-miR-32-5p, mmu-miR-92a-3p, mmu-miR-92b-3p

## Sheet: Supplemental Table 7
	Fetal Human Myoblast Differentiation						C2C12 Differentiation
	Control		DM13		DM15		Day 0 to Day 2		Day 2 to Day 5		Day 0 to Day 5
miRNA	logFC	FDR	logFC	FDR	logFC	FDR	logFC	FDR	logFC	FDR	logFC	FDR
miR-450a-5p	1.33495	0.0170346	2.05393	3.70682e-05	1.09363	0.136629	1.96671	2.04454e-29	0.580867	0.000789942	2.54765	4.61927e-51
miR-542-3p	2.04652	4.52712e-05	2.45478	5.43726e-07	1.22024	0.0988076	2.89076	3.16688e-60	0.203603	0.289773	3.09442	1.12661e-70
miR-503-5p	1.29042	0.0109086	1.80821	8.21356e-05	1.09397	0.0998212	2.37738	1.6797e-39	-0.471848	0.0102519	1.90552	5.56252e-26
miR-221-5p	-2.42638	0.000122699	-2.17859	0.0005075	-0.354533	0.90807	-1.30306	2.20914e-11	-0.0332457	0.9599	-1.33634	9.73234e-13
miR-222-3p	-2.41664	1.41848e-06	-2.35804	1.84786e-06	-1.14403	0.110406	-1.03303	2.32689e-12	-0.778225	3.61054e-07	-1.81127	1.20569e-34

## Sheet: Supplemental Table 8
miRNA	Confidence	mRNA targets
miR-450a-5p	High	MEIS2
	Moderate	FOXC2, P4HA3, TNFSF15, TOPBP1
miR-503-5p	Experimental	CCND1, CHEK1
	High	CCND2, KDSR, PNP
	Moderate	AMOTL2, ASAP1, CA6, EYA1, FAM171A1, FGF7, FOSL1, HELLS, HLX, HMGA1, KCNN4, KLHL26, NID1, POLE, PTPRN, SEMA6D, SMAD7
miR-542-3p	Experimental	PTGS2
	High	BIRC5, CLBA1, SLC48A1
	Moderate	AGPAT2, BCAT1, CA13, EFNA5, GFRA1, OSMR, PRPS2, TAGLN, TNFSF15, TSC22D1
miR-221-5p	High	ANXA11,B4GALT5, C1QTNF6, CAMK2A, CHRNA1, CLDN2, COL4A2, DAPK2, DBNDD1, DPEP1, EGR3, FYCO1, GPRC5C, LDLR, LPCAT3, LYNX1, MYZAP, RASSF7, RGMA, ROGDI, SGTB, SMTNL2, TMEM38A, VASH1, VWA1, ZNF667
	Moderate	ADAMTS14, ADAMTS16, AMIGO1, ANK1, ANKRD23, ARHGEF26, ARHGEF3, ARHGEF37, BMF, CAMK1G, CAPN1, CBX5, CCDC88C, CHRND, CMKLR1, CNR1, COBL, CRIP1, CSDC2, DHCR7, DUSP28, E2F2, EDNRA, ERBB2, FADS2, FNDC5, GPC1, GYS1, HMGCS1, IDI1, IGFBP5, IP6K3, JAM3, JAM3, KCNB1, KCNQ4, KCTD7, KLHL8, KSR1, LZTS1, MMP15, MTFP1, MTSS2, MYL9, NMRK2, NPNT, PAXX, PPP1R14C, PRKAR2A, RAB44, RALGPS2, RBM24, RNF122, RUNDC3A, SCN…
miR-222-3p	Experimental	BMF, ESR1
	High	AMMECR1, CPEB3, MYLIP, SOCS3, TSC22D3, TSPAN13
	Moderate	AMIGO1, ANKRD10, ASPA, ATP1B1, AXIN2, BRWD3, CASZ1, CNR1, FUT9, GABRB2, HES6, ITGA10, KPNA1, LYNX1, LYSMD1, MEGF9, MYOZ2, PBX3, PDE4DIP, RB1, RBM24, RFX3, SC5D, SCD, SEMA3C, TRAM2, VASH1
		abs(LFC)>1.2

## Sheet: Supplemental Table 9
Functional Category	Enrichment FDR	mRNA Targets in Pathway	miRNAs Targeting Pathway
Cell proliferation	3.60678e-05	17	miR-450a-5p, miR-503-5p, miR-542-3p
Positive regulation of cell proliferation	4.68265e-05	12	miR-450a-5p, miR-503-5p, miR-542-3p
Anatomical structure morphogenesis	0.000187	39	miR-221-5p, miR-222-3p
Tube development	0.000187	22	miR-221-5p, miR-222-3p
Regulation of cell proliferation	0.000244646	14	miR-450a-5p, miR-503-5p, miR-542-3p
Regulation of cholesterol metabolic process	0.000378	6	miR-221-5p, miR-222-3p
Regulation of developmental process	0.000378	37	miR-221-5p, miR-222-3p
Regulation of biological quality	0.00038	49	miR-221-5p, miR-222-3p
Positive regulation of cell differentiation	0.000449	20	miR-221-5p, miR-222-3p
Muscle system process	0.000449	13	miR-221-5p, miR-222-3p
Regulation of cell differentiation	0.000498	29	miR-221-5p, miR-222-3p
Regulation of sterol biosynthetic process	0.000653	5	miR-221-5p, miR-222-3p
Regulation of multicellular organismal development	0.000653	30	miR-221-5p, miR-222-3p
Regulation of cholesterol biosynthetic process	0.000653	5	miR-221-5p, miR-222-3p
Cellular developmental process	0.000653	50	miR-221-5p, miR-222-3p
Circulatory system development	0.000653	20	miR-221-5p, miR-222-3p
Muscle contraction	0.000735	11	miR-221-5p, miR-222-3p
Regulation of steroid metabolic process	0.000735	7	miR-221-5p, miR-222-3p
Cell differentiation	0.000735	48	miR-221-5p, miR-222-3p
Positive regulation of developmental process	0.000871	23	miR-221-5p, miR-222-3p
Tube morphogenesis	0.000967	17	miR-221-5p, miR-222-3p
Cell development	0.000967	30	miR-221-5p, miR-222-3p
